# Supplementary material for: Imaging-based organ-specific aging clock predicts human diseases and mortality
Source: Research Square preprint supplement (doi:10.21203/rs.3.rs-7855732/v1), 2025-11-14
Supplement: Supplementary file 1 [file 2376134f99ddb8ed0d9d2199.xlsx]

## Sheet: Content
Table of content
Table1-IDPs of organs
Table2-Demography of participants used for normative models of different organs
Table3-The definition of incident outcomes for survival and predcition analysis
Table4-Demography of participants used for assocation analyis between proteome and age gap of different organs
Table5-Demography of participants used for assocation analyis between blood biomarkers and age gap of different organs
Table6-Definition of the categories of different blood biomarkers
Table7-The statistics for the assocation between organ age gap and incident of diseases and mortalities
Table8-The statistics for the assocation between organ age gap and incident of diseases and mortalities, with additional covariate
Table9-The statistics for the assocation between stratified organ age gap and incident of diseases and mortalities
Table10-Prediction of incident of diseases and mortalities during the entire visits
Table11-Prediction of incident of diseases and mortalities with a time window of 10-year
Table12-The statistics for the assocition between organ age gap and blood biomarkers
Table13-The statistics for the assocition between organ age gap and blood biomarkers, with additonal covaraite
Table14-The statistics for the assocition between organ age gap and plasma proteome
Table15-The statistics for the assocition between organ age gap and plasma proteome, with additonal covaraite
Table16-Statistics for tissue enrichment results
Table17-Statistics for GO biological process enrichment results
Table18-The definition of categories of modifiable factors in PheWAS analysis
Table19-Statistics for PheWAS analysis
Table20-Statistics for PheWAS analysis that included eye
Table21-Drug Target

## Sheet: Table1-IDPs_organs
The IDPs selected for organs
Field ID	Field Name	Organ
25002.2.0	Volume of peripheral cortical grey matter	Brain GM
25006.2.0	Volume of grey matter	Brain GM
25011.2.0	Volume of thalamus (left)	Brain GM
25012.2.0	Volume of thalamus (right)	Brain GM
25013.2.0	Volume of caudate (left)	Brain GM
25014.2.0	Volume of caudate (right)	Brain GM
25015.2.0	Volume of putamen (left)	Brain GM
25016.2.0	Volume of putamen (right)	Brain GM
25017.2.0	Volume of pallidum (left)	Brain GM
25018.2.0	Volume of pallidum (right)	Brain GM
25019.2.0	Volume of hippocampus (left)	Brain GM
25020.2.0	Volume of hippocampus (right)	Brain GM
25021.2.0	Volume of amygdala (left)	Brain GM
25022.2.0	Volume of amygdala (right)	Brain GM
25023.2.0	Volume of accumbens (left)	Brain GM
25024.2.0	Volume of accumbens (right)	Brain GM
25782.2.0	Volume of grey matter in Frontal Pole (left)	Brain GM
25783.2.0	Volume of grey matter in Frontal Pole (right)	Brain GM
25784.2.0	Volume of grey matter in Insular Cortex (left)	Brain GM
25785.2.0	Volume of grey matter in Insular Cortex (right)	Brain GM
25786.2.0	Volume of grey matter in Superior Frontal Gyrus (left)	Brain GM
25787.2.0	Volume of grey matter in Superior Frontal Gyrus (right)	Brain GM
25788.2.0	Volume of grey matter in Middle Frontal Gyrus (left)	Brain GM
25789.2.0	Volume of grey matter in Middle Frontal Gyrus (right)	Brain GM
25790.2.0	Volume of grey matter in Inferior Frontal Gyrus, pars triangularis (left)	Brain GM
25791.2.0	Volume of grey matter in Inferior Frontal Gyrus, pars triangularis (right)	Brain GM
25792.2.0	Volume of grey matter in Inferior Frontal Gyrus, pars opercularis (left)	Brain GM
25793.2.0	Volume of grey matter in Inferior Frontal Gyrus, pars opercularis (right)	Brain GM
25794.2.0	Volume of grey matter in Precentral Gyrus (left)	Brain GM
25795.2.0	Volume of grey matter in Precentral Gyrus (right)	Brain GM
25796.2.0	Volume of grey matter in Temporal Pole (left)	Brain GM
25797.2.0	Volume of grey matter in Temporal Pole (right)	Brain GM
25798.2.0	Volume of grey matter in Superior Temporal Gyrus, anterior division (left)	Brain GM
25799.2.0	Volume of grey matter in Superior Temporal Gyrus, anterior division (right)	Brain GM
25800.2.0	Volume of grey matter in Superior Temporal Gyrus, posterior division (left)	Brain GM
25801.2.0	Volume of grey matter in Superior Temporal Gyrus, posterior division (right)	Brain GM
25802.2.0	Volume of grey matter in Middle Temporal Gyrus, anterior division (left)	Brain GM
25803.2.0	Volume of grey matter in Middle Temporal Gyrus, anterior division (right)	Brain GM
25804.2.0	Volume of grey matter in Middle Temporal Gyrus, posterior division (left)	Brain GM
25805.2.0	Volume of grey matter in Middle Temporal Gyrus, posterior division (right)	Brain GM
25806.2.0	Volume of grey matter in Middle Temporal Gyrus, temporooccipital part (left)	Brain GM
25807.2.0	Volume of grey matter in Middle Temporal Gyrus, temporooccipital part (right)	Brain GM
25808.2.0	Volume of grey matter in Inferior Temporal Gyrus, anterior division (left)	Brain GM
25809.2.0	Volume of grey matter in Inferior Temporal Gyrus, anterior division (right)	Brain GM
25810.2.0	Volume of grey matter in Inferior Temporal Gyrus, posterior division (left)	Brain GM
25811.2.0	Volume of grey matter in Inferior Temporal Gyrus, posterior division (right)	Brain GM
25812.2.0	Volume of grey matter in Inferior Temporal Gyrus, temporooccipital part (left)	Brain GM
25813.2.0	Volume of grey matter in Inferior Temporal Gyrus, temporooccipital part (right)	Brain GM
25814.2.0	Volume of grey matter in Postcentral Gyrus (left)	Brain GM
25815.2.0	Volume of grey matter in Postcentral Gyrus (right)	Brain GM
25816.2.0	Volume of grey matter in Superior Parietal Lobule (left)	Brain GM
25817.2.0	Volume of grey matter in Superior Parietal Lobule (right)	Brain GM
25818.2.0	Volume of grey matter in Supramarginal Gyrus, anterior division (left)	Brain GM
25819.2.0	Volume of grey matter in Supramarginal Gyrus, anterior division (right)	Brain GM
25820.2.0	Volume of grey matter in Supramarginal Gyrus, posterior division (left)	Brain GM
25821.2.0	Volume of grey matter in Supramarginal Gyrus, posterior division (right)	Brain GM
25822.2.0	Volume of grey matter in Angular Gyrus (left)	Brain GM
25823.2.0	Volume of grey matter in Angular Gyrus (right)	Brain GM
25824.2.0	Volume of grey matter in Lateral Occipital Cortex, superior division (left)	Brain GM
25825.2.0	Volume of grey matter in Lateral Occipital Cortex, superior division (right)	Brain GM
25826.2.0	Volume of grey matter in Lateral Occipital Cortex, inferior division (left)	Brain GM
25827.2.0	Volume of grey matter in Lateral Occipital Cortex, inferior division (right)	Brain GM
25828.2.0	Volume of grey matter in Intracalcarine Cortex (left)	Brain GM
25829.2.0	Volume of grey matter in Intracalcarine Cortex (right)	Brain GM
25830.2.0	Volume of grey matter in Frontal Medial Cortex (left)	Brain GM
25831.2.0	Volume of grey matter in Frontal Medial Cortex (right)	Brain GM
25832.2.0	Volume of grey matter in Juxtapositional Lobule Cortex (formerly Supplementary Motor Cortex) (left)	Brain GM
25833.2.0	Volume of grey matter in Juxtapositional Lobule Cortex (formerly Supplementary Motor Cortex) (right)	Brain GM
25834.2.0	Volume of grey matter in Subcallosal Cortex (left)	Brain GM
25835.2.0	Volume of grey matter in Subcallosal Cortex (right)	Brain GM
25836.2.0	Volume of grey matter in Paracingulate Gyrus (left)	Brain GM
25837.2.0	Volume of grey matter in Paracingulate Gyrus (right)	Brain GM
25838.2.0	Volume of grey matter in Cingulate Gyrus, anterior division (left)	Brain GM
25839.2.0	Volume of grey matter in Cingulate Gyrus, anterior division (right)	Brain GM
25840.2.0	Volume of grey matter in Cingulate Gyrus, posterior division (left)	Brain GM
25841.2.0	Volume of grey matter in Cingulate Gyrus, posterior division (right)	Brain GM
25842.2.0	Volume of grey matter in Precuneous Cortex (left)	Brain GM
25843.2.0	Volume of grey matter in Precuneous Cortex (right)	Brain GM
25844.2.0	Volume of grey matter in Cuneal Cortex (left)	Brain GM
25845.2.0	Volume of grey matter in Cuneal Cortex (right)	Brain GM
25846.2.0	Volume of grey matter in Frontal Orbital Cortex (left)	Brain GM
25847.2.0	Volume of grey matter in Frontal Orbital Cortex (right)	Brain GM
25848.2.0	Volume of grey matter in Parahippocampal Gyrus, anterior division (left)	Brain GM
25849.2.0	Volume of grey matter in Parahippocampal Gyrus, anterior division (right)	Brain GM
25850.2.0	Volume of grey matter in Parahippocampal Gyrus, posterior division (left)	Brain GM
25851.2.0	Volume of grey matter in Parahippocampal Gyrus, posterior division (right)	Brain GM
25852.2.0	Volume of grey matter in Lingual Gyrus (left)	Brain GM
25853.2.0	Volume of grey matter in Lingual Gyrus (right)	Brain GM
25854.2.0	Volume of grey matter in Temporal Fusiform Cortex, anterior division (left)	Brain GM
25855.2.0	Volume of grey matter in Temporal Fusiform Cortex, anterior division (right)	Brain GM
25856.2.0	Volume of grey matter in Temporal Fusiform Cortex, posterior division (left)	Brain GM
25857.2.0	Volume of grey matter in Temporal Fusiform Cortex, posterior division (right)	Brain GM
25858.2.0	Volume of grey matter in Temporal Occipital Fusiform Cortex (left)	Brain GM
25859.2.0	Volume of grey matter in Temporal Occipital Fusiform Cortex (right)	Brain GM
25860.2.0	Volume of grey matter in Occipital Fusiform Gyrus (left)	Brain GM
25861.2.0	Volume of grey matter in Occipital Fusiform Gyrus (right)	Brain GM
25862.2.0	Volume of grey matter in Frontal Operculum Cortex (left)	Brain GM
25863.2.0	Volume of grey matter in Frontal Operculum Cortex (right)	Brain GM
25864.2.0	Volume of grey matter in Central Opercular Cortex (left)	Brain GM
25865.2.0	Volume of grey matter in Central Opercular Cortex (right)	Brain GM
25866.2.0	Volume of grey matter in Parietal Operculum Cortex (left)	Brain GM
25867.2.0	Volume of grey matter in Parietal Operculum Cortex (right)	Brain GM
25868.2.0	Volume of grey matter in Planum Polare (left)	Brain GM
25869.2.0	Volume of grey matter in Planum Polare (right)	Brain GM
25870.2.0	Volume of grey matter in Heschls Gyrus (includes H1 and H2) (left),Brain,GM	Brain GM
25871-2.0	Volume of grey matter in Heschls Gyrus (includes H1 and H2) (right)	Brain GM
25872.2.0	Volume of grey matter in Planum Temporale (left)	Brain GM
25873.2.0	Volume of grey matter in Planum Temporale (right)	Brain GM
25874.2.0	Volume of grey matter in Supracalcarine Cortex (left)	Brain GM
25875.2.0	Volume of grey matter in Supracalcarine Cortex (right)	Brain GM
25876.2.0	Volume of grey matter in Occipital Pole (left)	Brain GM
25877.2.0	Volume of grey matter in Occipital Pole (right)	Brain GM
25878.2.0	Volume of grey matter in Thalamus (left)	Brain GM
25879.2.0	Volume of grey matter in Thalamus (right)	Brain GM
25880.2.0	Volume of grey matter in Caudate (left)	Brain GM
25881.2.0	Volume of grey matter in Caudate (right)	Brain GM
25882.2.0	Volume of grey matter in Putamen (left)	Brain GM
25883.2.0	Volume of grey matter in Putamen (right)	Brain GM
25884.2.0	Volume of grey matter in Pallidum (left)	Brain GM
25885.2.0	Volume of grey matter in Pallidum (right)	Brain GM
25886.2.0	Volume of grey matter in Hippocampus (left)	Brain GM
25887.2.0	Volume of grey matter in Hippocampus (right)	Brain GM
25888.2.0	Volume of grey matter in Amygdala (left)	Brain GM
25889.2.0	Volume of grey matter in Amygdala (right)	Brain GM
25890.2.0	Volume of grey matter in Ventral Striatum (left)	Brain GM
25891.2.0	Volume of grey matter in Ventral Striatum (right)	Brain GM
25892.2.0	Volume of grey matter in Brain-Stem	Brain GM
25893.2.0	Volume of grey matter in I-IV Cerebellum (left)	Brain GM
25894.2.0	Volume of grey matter in I-IV Cerebellum (right)	Brain GM
25895.2.0	Volume of grey matter in V Cerebellum (left)	Brain GM
25896.2.0	Volume of grey matter in V Cerebellum (right)	Brain GM
25897.2.0	Volume of grey matter in VI Cerebellum (left)	Brain GM
25898.2.0	Volume of grey matter in VI Cerebellum (vermis)	Brain GM
25899.2.0	Volume of grey matter in VI Cerebellum (right)	Brain GM
25900.2.0	Volume of grey matter in Crus I Cerebellum (left)	Brain GM
25901.2.0	Volume of grey matter in Crus I Cerebellum (vermis)	Brain GM
25902.2.0	Volume of grey matter in Crus I Cerebellum (right)	Brain GM
25903.2.0	Volume of grey matter in Crus II Cerebellum (left)	Brain GM
25904.2.0	Volume of grey matter in Crus II Cerebellum (vermis)	Brain GM
25905.2.0	Volume of grey matter in Crus II Cerebellum (right)	Brain GM
25906.2.0	Volume of grey matter in VIIb Cerebellum (left)	Brain GM
25907.2.0	Volume of grey matter in VIIb Cerebellum (vermis)	Brain GM
25908.2.0	Volume of grey matter in VIIb Cerebellum (right)	Brain GM
25909.2.0	Volume of grey matter in VIIIa Cerebellum (left)	Brain GM
25910.2.0	Volume of grey matter in VIIIa Cerebellum (vermis)	Brain GM
25911.2.0	Volume of grey matter in VIIIa Cerebellum (right)	Brain GM
25912.2.0	Volume of grey matter in VIIIb Cerebellum (left)	Brain GM
25913.2.0	Volume of grey matter in VIIIb Cerebellum (vermis)	Brain GM
25914.2.0	Volume of grey matter in VIIIb Cerebellum (right)	Brain GM
25915.2.0	Volume of grey matter in IX Cerebellum (left)	Brain GM
25916.2.0	Volume of grey matter in IX Cerebellum (vermis)	Brain GM
25917.2.0	Volume of grey matter in IX Cerebellum (right)	Brain GM
25918.2.0	Volume of grey matter in X Cerebellum (left)	Brain GM
25919.2.0	Volume of grey matter in X Cerebellum (vermis)	Brain GM
25920.2.0	Volume of grey matter in X Cerebellum (right)	Brain GM
26517.2.0	Volume of SubCortGray (whole brain)	Brain GM
26518.2.0	Volume of TotalGray (whole brain)	Brain GM
26558.2.0	Volume of Thalamus-Proper (left hemisphere)	Brain GM
26559.2.0	Volume of Caudate (left hemisphere)	Brain GM
26560.2.0	Volume of Putamen (left hemisphere)	Brain GM
26561.2.0	Volume of Pallidum (left hemisphere)	Brain GM
26562.2.0	Volume of Hippocampus (left hemisphere)	Brain GM
26563.2.0	Volume of Amygdala (left hemisphere)	Brain GM
26564.2.0	Volume of Accumbens-area (left hemisphere)	Brain GM
26589.2.0	Volume of Thalamus-Proper (right hemisphere)	Brain GM
26590.2.0	Volume of Caudate (right hemisphere)	Brain GM
26591.2.0	Volume of Putamen (right hemisphere)	Brain GM
26592.2.0	Volume of Pallidum (right hemisphere)	Brain GM
26593.2.0	Volume of Hippocampus (right hemisphere)	Brain GM
26594.2.0	Volume of Amygdala (right hemisphere)	Brain GM
26595.2.0	Volume of Accumbens-area (right hemisphere)	Brain GM
26600.2.0	Volume of Lateral-nucleus (left hemisphere)	Brain GM
26601.2.0	Volume of Basal-nucleus (left hemisphere)	Brain GM
26602.2.0	Volume of Accessory-Basal-nucleus (left hemisphere)	Brain GM
26603.2.0	Volume of Anterior-amygdaloid-area-AAA (left hemisphere)	Brain GM
26604.2.0	Volume of Central-nucleus (left hemisphere)	Brain GM
26605.2.0	Volume of Medial-nucleus (left hemisphere)	Brain GM
26606.2.0	Volume of Cortical-nucleus (left hemisphere)	Brain GM
26607.2.0	Volume of Corticoamygdaloid-transitio (left hemisphere)	Brain GM
26608.2.0	Volume of Paralaminar-nucleus (left hemisphere)	Brain GM
26609.2.0	Volume of Whole-amygdala (left hemisphere)	Brain GM
26610.2.0	Volume of Lateral-nucleus (right hemisphere)	Brain GM
26611.2.0	Volume of Basal-nucleus (right hemisphere)	Brain GM
26612.2.0	Volume of Accessory-Basal-nucleus (right hemisphere)	Brain GM
26613.2.0	Volume of Anterior-amygdaloid-area-AAA (right hemisphere)	Brain GM
26614.2.0	Volume of Central-nucleus (right hemisphere)	Brain GM
26615.2.0	Volume of Medial-nucleus (right hemisphere)	Brain GM
26616.2.0	Volume of Cortical-nucleus (right hemisphere)	Brain GM
26617.2.0	Volume of Corticoamygdaloid-transitio (right hemisphere)	Brain GM
26618.2.0	Volume of Paralaminar-nucleus (right hemisphere)	Brain GM
26619.2.0	Volume of Whole-amygdala (right hemisphere)	Brain GM
26620.2.0	Volume of Hippocampal-tail (left hemisphere)	Brain GM
26621.2.0	Volume of subiculum-body (left hemisphere)	Brain GM
26622.2.0	Volume of CA1-body (left hemisphere)	Brain GM
26623.2.0	Volume of subiculum-head (left hemisphere)	Brain GM
26624.2.0	Volume of hippocampal-fissure (left hemisphere)	Brain GM
26625.2.0	Volume of presubiculum-head (left hemisphere)	Brain GM
26626.2.0	Volume of CA1-head (left hemisphere)	Brain GM
26627.2.0	Volume of presubiculum-body (left hemisphere)	Brain GM
26628.2.0	Volume of parasubiculum (left hemisphere)	Brain GM
26629.2.0	Volume of molecular-layer-HP-head (left hemisphere)	Brain GM
26630.2.0	Volume of molecular-layer-HP-body (left hemisphere)	Brain GM
26631.2.0	Volume of GC-ML-DG-head (left hemisphere)	Brain GM
26632.2.0	Volume of CA3-body (left hemisphere)	Brain GM
26633.2.0	Volume of GC-ML-DG-body (left hemisphere)	Brain GM
26634.2.0	Volume of CA4-head (left hemisphere)	Brain GM
26635.2.0	Volume of CA4-body (left hemisphere)	Brain GM
26636.2.0	Volume of fimbria (left hemisphere)	Brain GM
26637.2.0	Volume of CA3-head (left hemisphere)	Brain GM
26638.2.0	Volume of HATA (left hemisphere)	Brain GM
26639.2.0	Volume of Whole-hippocampal-body (left hemisphere)	Brain GM
26640.2.0	Volume of Whole-hippocampal-head (left hemisphere)	Brain GM
26641.2.0	Volume of Whole-hippocampus (left hemisphere)	Brain GM
26642.2.0	Volume of Hippocampal-tail (right hemisphere)	Brain GM
26643.2.0	Volume of subiculum-body (right hemisphere)	Brain GM
26644.2.0	Volume of CA1-body (right hemisphere)	Brain GM
26645.2.0	Volume of subiculum-head (right hemisphere)	Brain GM
26646.2.0	Volume of hippocampal-fissure (right hemisphere)	Brain GM
26647.2.0	Volume of presubiculum-head (right hemisphere)	Brain GM
26648.2.0	Volume of CA1-head (right hemisphere)	Brain GM
26649.2.0	Volume of presubiculum-body (right hemisphere)	Brain GM
26650.2.0	Volume of parasubiculum (right hemisphere)	Brain GM
26651.2.0	Volume of molecular-layer-HP-head (right hemisphere)	Brain GM
26652.2.0	Volume of molecular-layer-HP-body (right hemisphere)	Brain GM
26653.2.0	Volume of GC-ML-DG-head (right hemisphere)	Brain GM
26654.2.0	Volume of CA3-body (right hemisphere)	Brain GM
26655.2.0	Volume of GC-ML-DG-body (right hemisphere)	Brain GM
26656.2.0	Volume of CA4-head (right hemisphere)	Brain GM
26657.2.0	Volume of CA4-body (right hemisphere)	Brain GM
26658.2.0	Volume of fimbria (right hemisphere)	Brain GM
26659.2.0	Volume of CA3-head (right hemisphere)	Brain GM
26660.2.0	Volume of HATA (right hemisphere)	Brain GM
26661.2.0	Volume of Whole-hippocampal-body (right hemisphere)	Brain GM
26662.2.0	Volume of Whole-hippocampal-head (right hemisphere)	Brain GM
26663.2.0	Volume of Whole-hippocampus (right hemisphere)	Brain GM
26664.2.0	Volume of MGN (left hemisphere)	Brain GM
26665.2.0	Volume of LGN (left hemisphere)	Brain GM
26666.2.0	Volume of PuI (left hemisphere)	Brain GM
26667.2.0	Volume of PuM (left hemisphere)	Brain GM
26668.2.0	Volume of L-Sg (left hemisphere)	Brain GM
26669.2.0	Volume of VPL (left hemisphere)	Brain GM
26670.2.0	Volume of CM (left hemisphere)	Brain GM
26671.2.0	Volume of VLa (left hemisphere)	Brain GM
26672.2.0	Volume of PuA (left hemisphere)	Brain GM
26673.2.0	Volume of MDm (left hemisphere)	Brain GM
26674.2.0	Volume of Pf (left hemisphere)	Brain GM
26675.2.0	Volume of VAmc (left hemisphere)	Brain GM
26676.2.0	Volume of MDl (left hemisphere)	Brain GM
26677.2.0	Volume of CeM (left hemisphere)	Brain GM
26678.2.0	Volume of VA (left hemisphere)	Brain GM
26679.2.0	Volume of MV(Re) (left hemisphere)	Brain GM
26680.2.0	Volume of VM (left hemisphere)	Brain GM
26681.2.0	Volume of CL (left hemisphere)	Brain GM
26682.2.0	Volume of PuL (left hemisphere)	Brain GM
26683.2.0	Volume of Pt (left hemisphere)	Brain GM
26684.2.0	Volume of AV (left hemisphere)	Brain GM
26685.2.0	Volume of Pc (left hemisphere)	Brain GM
26686.2.0	Volume of VLp (left hemisphere)	Brain GM
26687.2.0	Volume of LP (left hemisphere)	Brain GM
26688.2.0	Volume of LGN (right hemisphere)	Brain GM
26689.2.0	Volume of MGN (right hemisphere)	Brain GM
26690.2.0	Volume of PuI (right hemisphere)	Brain GM
26691.2.0	Volume of PuM (right hemisphere)	Brain GM
26692.2.0	Volume of L-Sg (right hemisphere)	Brain GM
26693.2.0	Volume of VPL (right hemisphere)	Brain GM
26694.2.0	Volume of CM (right hemisphere)	Brain GM
26695.2.0	Volume of VLa (right hemisphere)	Brain GM
26696.2.0	Volume of PuA (right hemisphere)	Brain GM
26697.2.0	Volume of MDm (right hemisphere)	Brain GM
26698.2.0	Volume of Pf (right hemisphere)	Brain GM
26699.2.0	Volume of VAmc (right hemisphere)	Brain GM
26700.2.0	Volume of MDl (right hemisphere)	Brain GM
26701.2.0	Volume of VA (right hemisphere)	Brain GM
26702.2.0	Volume of MV(Re) (right hemisphere)	Brain GM
26703.2.0	Volume of CeM (right hemisphere)	Brain GM
26704.2.0	Volume of VM (right hemisphere)	Brain GM
26705.2.0	Volume of PuL (right hemisphere)	Brain GM
26706.2.0	Volume of CL (right hemisphere)	Brain GM
26707.2.0	Volume of VLp (right hemisphere)	Brain GM
26708.2.0	Volume of Pc (right hemisphere)	Brain GM
26709.2.0	Volume of Pt (right hemisphere)	Brain GM
26710.2.0	Volume of AV (right hemisphere)	Brain GM
26711.2.0	Volume of LP (right hemisphere)	Brain GM
26712.2.0	Volume of LD (left hemisphere)	Brain GM
26713.2.0	Volume of LD (right hemisphere)	Brain GM
26714.2.0	Volume of Whole-thalamus (left hemisphere)	Brain GM
26715.2.0	Volume of Whole-thalamus (right hemisphere)	Brain GM
26721.2.0	Area of TotalSurface (left hemisphere)	Brain GM
26722.2.0	Area of bankssts (left hemisphere)	Brain GM
26723.2.0	Area of caudalanteriorcingulate (left hemisphere)	Brain GM
26724.2.0	Area of caudalmiddlefrontal (left hemisphere)	Brain GM
26725.2.0	Area of cuneus (left hemisphere)	Brain GM
26726.2.0	Area of entorhinal (left hemisphere)	Brain GM
26727.2.0	Area of fusiform (left hemisphere)	Brain GM
26728.2.0	Area of inferiorparietal (left hemisphere)	Brain GM
26729.2.0	Area of inferiortemporal (left hemisphere)	Brain GM
26730.2.0	Area of isthmuscingulate (left hemisphere)	Brain GM
26731.2.0	Area of lateraloccipital (left hemisphere)	Brain GM
26732.2.0	Area of lateralorbitofrontal (left hemisphere)	Brain GM
26733.2.0	Area of lingual (left hemisphere)	Brain GM
26734.2.0	Area of medialorbitofrontal (left hemisphere)	Brain GM
26735.2.0	Area of middletemporal (left hemisphere)	Brain GM
26736.2.0	Area of parahippocampal (left hemisphere)	Brain GM
26737.2.0	Area of paracentral (left hemisphere)	Brain GM
26738.2.0	Area of parsopercularis (left hemisphere)	Brain GM
26739.2.0	Area of parsorbitalis (left hemisphere)	Brain GM
26740.2.0	Area of parstriangularis (left hemisphere)	Brain GM
26741.2.0	Area of pericalcarine (left hemisphere)	Brain GM
26742.2.0	Area of postcentral (left hemisphere)	Brain GM
26743.2.0	Area of posteriorcingulate (left hemisphere)	Brain GM
26744.2.0	Area of precentral (left hemisphere)	Brain GM
26745.2.0	Area of precuneus (left hemisphere)	Brain GM
26746.2.0	Area of rostralanteriorcingulate (left hemisphere)	Brain GM
26747.2.0	Area of rostralmiddlefrontal (left hemisphere)	Brain GM
26748.2.0	Area of superiorfrontal (left hemisphere)	Brain GM
26749.2.0	Area of superiorparietal (left hemisphere)	Brain GM
26750.2.0	Area of superiortemporal (left hemisphere)	Brain GM
26751.2.0	Area of supramarginal (left hemisphere)	Brain GM
26752.2.0	Area of frontalpole (left hemisphere)	Brain GM
26753.2.0	Area of transversetemporal (left hemisphere)	Brain GM
26754.2.0	Area of insula (left hemisphere)	Brain GM
26755.2.0	Mean thickness of GlobalMeanMean thickness (left hemisphere)	Brain GM
26756.2.0	Mean thickness of bankssts (left hemisphere)	Brain GM
26757.2.0	Mean thickness of caudalanteriorcingulate (left hemisphere)	Brain GM
26758.2.0	Mean thickness of caudalmiddlefrontal (left hemisphere)	Brain GM
26759.2.0	Mean thickness of cuneus (left hemisphere)	Brain GM
26760.2.0	Mean thickness of entorhinal (left hemisphere)	Brain GM
26761.2.0	Mean thickness of fusiform (left hemisphere)	Brain GM
26762.2.0	Mean thickness of inferiorparietal (left hemisphere)	Brain GM
26763.2.0	Mean thickness of inferiortemporal (left hemisphere)	Brain GM
26764.2.0	Mean thickness of isthmuscingulate (left hemisphere)	Brain GM
26765.2.0	Mean thickness of lateraloccipital (left hemisphere)	Brain GM
26766.2.0	Mean thickness of lateralorbitofrontal (left hemisphere)	Brain GM
26767.2.0	Mean thickness of lingual (left hemisphere)	Brain GM
26768.2.0	Mean thickness of medialorbitofrontal (left hemisphere)	Brain GM
26769.2.0	Mean thickness of middletemporal (left hemisphere)	Brain GM
26770.2.0	Mean thickness of parahippocampal (left hemisphere)	Brain GM
26771.2.0	Mean thickness of paracentral (left hemisphere)	Brain GM
26772.2.0	Mean thickness of parsopercularis (left hemisphere)	Brain GM
26773.2.0	Mean thickness of parsorbitalis (left hemisphere)	Brain GM
26774.2.0	Mean thickness of parstriangularis (left hemisphere)	Brain GM
26775.2.0	Mean thickness of pericalcarine (left hemisphere)	Brain GM
26776.2.0	Mean thickness of postcentral (left hemisphere)	Brain GM
26777.2.0	Mean thickness of posteriorcingulate (left hemisphere)	Brain GM
26778.2.0	Mean thickness of precentral (left hemisphere)	Brain GM
26779.2.0	Mean thickness of precuneus (left hemisphere)	Brain GM
26780.2.0	Mean thickness of rostralanteriorcingulate (left hemisphere)	Brain GM
26781.2.0	Mean thickness of rostralmiddlefrontal (left hemisphere)	Brain GM
26782.2.0	Mean thickness of superiorfrontal (left hemisphere)	Brain GM
26783.2.0	Mean thickness of superiorparietal (left hemisphere)	Brain GM
26784.2.0	Mean thickness of superiortemporal (left hemisphere)	Brain GM
26785.2.0	Mean thickness of supramarginal (left hemisphere)	Brain GM
26786.2.0	Mean thickness of frontalpole (left hemisphere)	Brain GM
26787.2.0	Mean thickness of transversetemporal (left hemisphere)	Brain GM
26788.2.0	Mean thickness of insula (left hemisphere)	Brain GM
26789.2.0	Volume of bankssts (left hemisphere)	Brain GM
26790.2.0	Volume of caudalanteriorcingulate (left hemisphere)	Brain GM
26791.2.0	Volume of caudalmiddlefrontal (left hemisphere)	Brain GM
26792.2.0	Volume of cuneus (left hemisphere)	Brain GM
26793.2.0	Volume of entorhinal (left hemisphere)	Brain GM
26794.2.0	Volume of fusiform (left hemisphere)	Brain GM
26795.2.0	Volume of inferiorparietal (left hemisphere)	Brain GM
26796.2.0	Volume of inferiortemporal (left hemisphere)	Brain GM
26797.2.0	Volume of isthmuscingulate (left hemisphere)	Brain GM
26798.2.0	Volume of lateraloccipital (left hemisphere)	Brain GM
26799.2.0	Volume of lateralorbitofrontal (left hemisphere)	Brain GM
26800.2.0	Volume of lingual (left hemisphere)	Brain GM
26801.2.0	Volume of medialorbitofrontal (left hemisphere)	Brain GM
26802.2.0	Volume of middletemporal (left hemisphere)	Brain GM
26803.2.0	Volume of parahippocampal (left hemisphere)	Brain GM
26804.2.0	Volume of paracentral (left hemisphere)	Brain GM
26805.2.0	Volume of parsopercularis (left hemisphere)	Brain GM
26806.2.0	Volume of parsorbitalis (left hemisphere)	Brain GM
26807.2.0	Volume of parstriangularis (left hemisphere)	Brain GM
26808.2.0	Volume of pericalcarine (left hemisphere)	Brain GM
26809.2.0	Volume of postcentral (left hemisphere)	Brain GM
26810.2.0	Volume of posteriorcingulate (left hemisphere)	Brain GM
26811.2.0	Volume of precentral (left hemisphere)	Brain GM
26812.2.0	Volume of precuneus (left hemisphere)	Brain GM
26813.2.0	Volume of rostralanteriorcingulate (left hemisphere)	Brain GM
26814.2.0	Volume of rostralmiddlefrontal (left hemisphere)	Brain GM
26815.2.0	Volume of superiorfrontal (left hemisphere)	Brain GM
26816.2.0	Volume of superiorparietal (left hemisphere)	Brain GM
26817.2.0	Volume of superiortemporal (left hemisphere)	Brain GM
26818.2.0	Volume of supramarginal (left hemisphere)	Brain GM
26819.2.0	Volume of frontalpole (left hemisphere)	Brain GM
26820.2.0	Volume of transversetemporal (left hemisphere)	Brain GM
26821.2.0	Volume of insula (left hemisphere)	Brain GM
26822.2.0	Area of TotalSurface (right hemisphere)	Brain GM
26823.2.0	Area of bankssts (right hemisphere)	Brain GM
26824.2.0	Area of caudalanteriorcingulate (right hemisphere)	Brain GM
26825.2.0	Area of caudalmiddlefrontal (right hemisphere)	Brain GM
26826.2.0	Area of cuneus (right hemisphere)	Brain GM
26827.2.0	Area of entorhinal (right hemisphere)	Brain GM
26828.2.0	Area of fusiform (right hemisphere)	Brain GM
26829.2.0	Area of inferiorparietal (right hemisphere)	Brain GM
26830.2.0	Area of inferiortemporal (right hemisphere)	Brain GM
26831.2.0	Area of isthmuscingulate (right hemisphere)	Brain GM
26832.2.0	Area of lateraloccipital (right hemisphere)	Brain GM
26833.2.0	Area of lateralorbitofrontal (right hemisphere)	Brain GM
26834.2.0	Area of lingual (right hemisphere)	Brain GM
26835.2.0	Area of medialorbitofrontal (right hemisphere)	Brain GM
26836.2.0	Area of middletemporal (right hemisphere)	Brain GM
26837.2.0	Area of parahippocampal (right hemisphere)	Brain GM
26838.2.0	Area of paracentral (right hemisphere)	Brain GM
26839.2.0	Area of parsopercularis (right hemisphere)	Brain GM
26840.2.0	Area of parsorbitalis (right hemisphere)	Brain GM
26841.2.0	Area of parstriangularis (right hemisphere)	Brain GM
26842.2.0	Area of pericalcarine (right hemisphere)	Brain GM
26843.2.0	Area of postcentral (right hemisphere)	Brain GM
26844.2.0	Area of posteriorcingulate (right hemisphere)	Brain GM
26845.2.0	Area of precentral (right hemisphere)	Brain GM
26846.2.0	Area of precuneus (right hemisphere)	Brain GM
26847.2.0	Area of rostralanteriorcingulate (right hemisphere)	Brain GM
26848.2.0	Area of rostralmiddlefrontal (right hemisphere)	Brain GM
26849.2.0	Area of superiorfrontal (right hemisphere)	Brain GM
26850.2.0	Area of superiorparietal (right hemisphere)	Brain GM
26851.2.0	Area of superiortemporal (right hemisphere)	Brain GM
26852.2.0	Area of supramarginal (right hemisphere)	Brain GM
26853.2.0	Area of frontalpole (right hemisphere)	Brain GM
26854.2.0	Area of transversetemporal (right hemisphere)	Brain GM
26855.2.0	Area of insula (right hemisphere)	Brain GM
26856.2.0	Mean thickness of GlobalMeanMean thickness (right hemisphere)	Brain GM
26857.2.0	Mean thickness of bankssts (right hemisphere)	Brain GM
26858.2.0	Mean thickness of caudalanteriorcingulate (right hemisphere)	Brain GM
26859.2.0	Mean thickness of caudalmiddlefrontal (right hemisphere)	Brain GM
26860.2.0	Mean thickness of cuneus (right hemisphere)	Brain GM
26861.2.0	Mean thickness of entorhinal (right hemisphere)	Brain GM
26862.2.0	Mean thickness of fusiform (right hemisphere)	Brain GM
26863.2.0	Mean thickness of inferiorparietal (right hemisphere)	Brain GM
26864.2.0	Mean thickness of inferiortemporal (right hemisphere)	Brain GM
26865.2.0	Mean thickness of isthmuscingulate (right hemisphere)	Brain GM
26866.2.0	Mean thickness of lateraloccipital (right hemisphere)	Brain GM
26867.2.0	Mean thickness of lateralorbitofrontal (right hemisphere)	Brain GM
26868.2.0	Mean thickness of lingual (right hemisphere)	Brain GM
26869.2.0	Mean thickness of medialorbitofrontal (right hemisphere)	Brain GM
26870.2.0	Mean thickness of middletemporal (right hemisphere)	Brain GM
26871.2.0	Mean thickness of parahippocampal (right hemisphere)	Brain GM
26872.2.0	Mean thickness of paracentral (right hemisphere)	Brain GM
26873.2.0	Mean thickness of parsopercularis (right hemisphere)	Brain GM
26874.2.0	Mean thickness of parsorbitalis (right hemisphere)	Brain GM
26875.2.0	Mean thickness of parstriangularis (right hemisphere)	Brain GM
26876.2.0	Mean thickness of pericalcarine (right hemisphere)	Brain GM
26877.2.0	Mean thickness of postcentral (right hemisphere)	Brain GM
26878.2.0	Mean thickness of posteriorcingulate (right hemisphere)	Brain GM
26879.2.0	Mean thickness of precentral (right hemisphere)	Brain GM
26880.2.0	Mean thickness of precuneus (right hemisphere)	Brain GM
26881.2.0	Mean thickness of rostralanteriorcingulate (right hemisphere)	Brain GM
26882.2.0	Mean thickness of rostralmiddlefrontal (right hemisphere)	Brain GM
26883.2.0	Mean thickness of superiorfrontal (right hemisphere)	Brain GM
26884.2.0	Mean thickness of superiorparietal (right hemisphere)	Brain GM
26885.2.0	Mean thickness of superiortemporal (right hemisphere)	Brain GM
26886.2.0	Mean thickness of supramarginal (right hemisphere)	Brain GM
26887.2.0	Mean thickness of frontalpole (right hemisphere)	Brain GM
26888.2.0	Mean thickness of transversetemporal (right hemisphere)	Brain GM
26889.2.0	Mean thickness of insula (right hemisphere)	Brain GM
26890.2.0	Volume of bankssts (right hemisphere)	Brain GM
26891.2.0	Volume of caudalanteriorcingulate (right hemisphere)	Brain GM
26892.2.0	Volume of caudalmiddlefrontal (right hemisphere)	Brain GM
26893.2.0	Volume of cuneus (right hemisphere)	Brain GM
26894.2.0	Volume of entorhinal (right hemisphere)	Brain GM
26895.2.0	Volume of fusiform (right hemisphere)	Brain GM
26896.2.0	Volume of inferiorparietal (right hemisphere)	Brain GM
26897.2.0	Volume of inferiortemporal (right hemisphere)	Brain GM
26898.2.0	Volume of isthmuscingulate (right hemisphere)	Brain GM
26899.2.0	Volume of lateraloccipital (right hemisphere)	Brain GM
26900.2.0	Volume of lateralorbitofrontal (right hemisphere)	Brain GM
26901.2.0	Volume of lingual (right hemisphere)	Brain GM
26902.2.0	Volume of medialorbitofrontal (right hemisphere)	Brain GM
26903.2.0	Volume of middletemporal (right hemisphere)	Brain GM
26904.2.0	Volume of parahippocampal (right hemisphere)	Brain GM
26905.2.0	Volume of paracentral (right hemisphere)	Brain GM
26906.2.0	Volume of parsopercularis (right hemisphere)	Brain GM
26907.2.0	Volume of parsorbitalis (right hemisphere)	Brain GM
26908.2.0	Volume of parstriangularis (right hemisphere)	Brain GM
26909.2.0	Volume of pericalcarine (right hemisphere)	Brain GM
26910.2.0	Volume of postcentral (right hemisphere)	Brain GM
26911.2.0	Volume of posteriorcingulate (right hemisphere)	Brain GM
26912.2.0	Volume of precentral (right hemisphere)	Brain GM
26913.2.0	Volume of precuneus (right hemisphere)	Brain GM
26914.2.0	Volume of rostralanteriorcingulate (right hemisphere)	Brain GM
26915.2.0	Volume of rostralmiddlefrontal (right hemisphere)	Brain GM
26916.2.0	Volume of superiorfrontal (right hemisphere)	Brain GM
26917.2.0	Volume of superiorparietal (right hemisphere)	Brain GM
26918.2.0	Volume of superiortemporal (right hemisphere)	Brain GM
26919.2.0	Volume of supramarginal (right hemisphere)	Brain GM
26920.2.0	Volume of frontalpole (right hemisphere)	Brain GM
26921.2.0	Volume of transversetemporal (right hemisphere)	Brain GM
26922.2.0	Volume of insula (right hemisphere)	Brain GM
27059.2.0	Area of BA1 (left hemisphere)	Brain GM
27060.2.0	Area of BA2 (left hemisphere)	Brain GM
27061.2.0	Area of BA3a (left hemisphere)	Brain GM
27062.2.0	Area of BA3b (left hemisphere)	Brain GM
27063.2.0	Area of BA4a (left hemisphere)	Brain GM
27064.2.0	Area of BA4p (left hemisphere)	Brain GM
27065.2.0	Area of BA6 (left hemisphere)	Brain GM
27066.2.0	Area of BA44 (left hemisphere)	Brain GM
27067.2.0	Area of BA45 (left hemisphere)	Brain GM
27068.2.0	Area of V1 (left hemisphere)	Brain GM
27069.2.0	Area of V2 (left hemisphere)	Brain GM
27070.2.0	Area of MT (left hemisphere)	Brain GM
27071.2.0	Area of perirhinal (left hemisphere)	Brain GM
27073.2.0	Mean thickness of BA1 (left hemisphere)	Brain GM
27074.2.0	Mean thickness of BA2 (left hemisphere)	Brain GM
27075.2.0	Mean thickness of BA3a (left hemisphere)	Brain GM
27076.2.0	Mean thickness of BA3b (left hemisphere)	Brain GM
27077.2.0	Mean thickness of BA4a (left hemisphere)	Brain GM
27078.2.0	Mean thickness of BA4p (left hemisphere)	Brain GM
27079.2.0	Mean thickness of BA6 (left hemisphere)	Brain GM
27080.2.0	Mean thickness of BA44 (left hemisphere)	Brain GM
27081.2.0	Mean thickness of BA45 (left hemisphere)	Brain GM
27082.2.0	Mean thickness of V1 (left hemisphere)	Brain GM
27083.2.0	Mean thickness of V2 (left hemisphere)	Brain GM
27084.2.0	Mean thickness of MT (left hemisphere)	Brain GM
27085.2.0	Mean thickness of perirhinal (left hemisphere)	Brain GM
27087.2.0	Volume of BA1 (left hemisphere)	Brain GM
27088.2.0	Volume of BA2 (left hemisphere)	Brain GM
27089.2.0	Volume of BA3a (left hemisphere)	Brain GM
27090.2.0	Volume of BA3b (left hemisphere)	Brain GM
27091.2.0	Volume of BA4a (left hemisphere)	Brain GM
27092.2.0	Volume of BA4p (left hemisphere)	Brain GM
27093.2.0	Volume of BA6 (left hemisphere)	Brain GM
27094.2.0	Volume of BA44 (left hemisphere)	Brain GM
27095.2.0	Volume of BA45 (left hemisphere)	Brain GM
27096.2.0	Volume of V1 (left hemisphere)	Brain GM
27097.2.0	Volume of V2 (left hemisphere)	Brain GM
27098.2.0	Volume of MT (left hemisphere)	Brain GM
27099.2.0	Volume of perirhinal (left hemisphere)	Brain GM
27101.2.0	Area of BA1 (right hemisphere)	Brain GM
27102.2.0	Area of BA2 (right hemisphere)	Brain GM
27103.2.0	Area of BA3a (right hemisphere)	Brain GM
27104.2.0	Area of BA3b (right hemisphere)	Brain GM
27105.2.0	Area of BA4a (right hemisphere)	Brain GM
27106.2.0	Area of BA4p (right hemisphere)	Brain GM
27107.2.0	Area of BA6 (right hemisphere)	Brain GM
27108.2.0	Area of BA44 (right hemisphere)	Brain GM
27109.2.0	Area of BA45 (right hemisphere)	Brain GM
27110.2.0	Area of V1 (right hemisphere)	Brain GM
27111.2.0	Area of V2 (right hemisphere)	Brain GM
27112.2.0	Area of MT (right hemisphere)	Brain GM
27113.2.0	Area of perirhinal (right hemisphere)	Brain GM
27115.2.0	Mean thickness of BA1 (right hemisphere)	Brain GM
27116.2.0	Mean thickness of BA2 (right hemisphere)	Brain GM
27117.2.0	Mean thickness of BA3a (right hemisphere)	Brain GM
27118.2.0	Mean thickness of BA3b (right hemisphere)	Brain GM
27119.2.0	Mean thickness of BA4a (right hemisphere)	Brain GM
27120.2.0	Mean thickness of BA4p (right hemisphere)	Brain GM
27121.2.0	Mean thickness of BA6 (right hemisphere)	Brain GM
27122.2.0	Mean thickness of BA44 (right hemisphere)	Brain GM
27123.2.0	Mean thickness of BA45 (right hemisphere)	Brain GM
27124.2.0	Mean thickness of V1 (right hemisphere)	Brain GM
27125.2.0	Mean thickness of V2 (right hemisphere)	Brain GM
27126.2.0	Mean thickness of MT (right hemisphere)	Brain GM
27127.2.0	Mean thickness of perirhinal (right hemisphere)	Brain GM
27129.2.0	Volume of BA1 (right hemisphere)	Brain GM
27130.2.0	Volume of BA2 (right hemisphere)	Brain GM
27131.2.0	Volume of BA3a (right hemisphere)	Brain GM
27132.2.0	Volume of BA3b (right hemisphere)	Brain GM
27133.2.0	Volume of BA4a (right hemisphere)	Brain GM
27134.2.0	Volume of BA4p (right hemisphere)	Brain GM
27135.2.0	Volume of BA6 (right hemisphere)	Brain GM
27136.2.0	Volume of BA44 (right hemisphere)	Brain GM
27137.2.0	Volume of BA45 (right hemisphere)	Brain GM
27138.2.0	Volume of V1 (right hemisphere)	Brain GM
27139.2.0	Volume of V2 (right hemisphere)	Brain GM
27140.2.0	Volume of MT (right hemisphere)	Brain GM
27141.2.0	Volume of perirhinal (right hemisphere)	Brain GM
27329.2.0	Area of G+S-frontomargin (left hemisphere)	Brain GM
27330.2.0	Area of G+S-occipital-inf (left hemisphere)	Brain GM
27331.2.0	Area of G+S-paracentral (left hemisphere)	Brain GM
27332.2.0	Area of G+S-subcentral (left hemisphere)	Brain GM
27333.2.0	Area of G+S-transv-frontopol (left hemisphere)	Brain GM
27334.2.0	Area of G+S-cingul-Ant (left hemisphere)	Brain GM
27335.2.0	Area of G+S-cingul-Mid-Ant (left hemisphere)	Brain GM
27336.2.0	Area of G+S-cingul-Mid-Post (left hemisphere)	Brain GM
27337.2.0	Area of G-cingul-Post-dorsal (left hemisphere)	Brain GM
27338.2.0	Area of G-cingul-Post-ventral (left hemisphere)	Brain GM
27339.2.0	Area of G-cuneus (left hemisphere)	Brain GM
27340.2.0	Area of G-front-inf-Opercular (left hemisphere)	Brain GM
27341.2.0	Area of G-front-inf-Orbital (left hemisphere)	Brain GM
27342.2.0	Area of G-front-inf-Triangul (left hemisphere)	Brain GM
27343.2.0	Area of G-front-middle (left hemisphere)	Brain GM
27344.2.0	Area of G-front-sup (left hemisphere)	Brain GM
27345.2.0	Area of G-Ins-lg+S-cent-ins (left hemisphere)	Brain GM
27346.2.0	Area of G-insular-short (left hemisphere)	Brain GM
27347.2.0	Area of G-occipital-middle (left hemisphere)	Brain GM
27348.2.0	Area of G-occipital-sup (left hemisphere)	Brain GM
27349.2.0	Area of G-oc-temp-lat-fusifor (left hemisphere)	Brain GM
27350.2.0	Area of G-oc-temp-med-Lingual (left hemisphere)	Brain GM
27351.2.0	Area of G-oc-temp-med-Parahip (left hemisphere)	Brain GM
27352.2.0	Area of G-orbital (left hemisphere)	Brain GM
27353.2.0	Area of G-pariet-inf-Angular (left hemisphere)	Brain GM
27354.2.0	Area of G-pariet-inf-Supramar (left hemisphere)	Brain GM
27355.2.0	Area of G-parietal-sup (left hemisphere)	Brain GM
27356.2.0	Area of G-postcentral (left hemisphere)	Brain GM
27357.2.0	Area of G-precentral (left hemisphere)	Brain GM
27358.2.0	Area of G-precuneus (left hemisphere)	Brain GM
27359.2.0	Area of G-rectus (left hemisphere)	Brain GM
27360.2.0	Area of G-subcallosal (left hemisphere)	Brain GM
27361.2.0	Area of G-temp-sup-G-T-transv (left hemisphere)	Brain GM
27362.2.0	Area of G-temp-sup-Lateral (left hemisphere)	Brain GM
27363.2.0	Area of G-temp-sup-Plan-polar (left hemisphere)	Brain GM
27364.2.0	Area of G-temp-sup-Plan-tempo (left hemisphere)	Brain GM
27365.2.0	Area of G-temporal-inf (left hemisphere)	Brain GM
27366.2.0	Area of G-temporal-middle (left hemisphere)	Brain GM
27367.2.0	Area of Lat-Fis-ant-Horizont (left hemisphere)	Brain GM
27368.2.0	Area of Lat-Fis-ant-Vertical (left hemisphere)	Brain GM
27369.2.0	Area of Lat-Fis-post (left hemisphere)	Brain GM
27370.2.0	Area of Pole-occipital (left hemisphere)	Brain GM
27371.2.0	Area of Pole-temporal (left hemisphere)	Brain GM
27372.2.0	Area of S-calcarine (left hemisphere)	Brain GM
27373.2.0	Area of S-central (left hemisphere)	Brain GM
27374.2.0	Area of S-cingul-Marginalis (left hemisphere)	Brain GM
27375.2.0	Area of S-circular-insula-ant (left hemisphere)	Brain GM
27376.2.0	Area of S-circular-insula-inf (left hemisphere)	Brain GM
27377.2.0	Area of S-circular-insula-sup (left hemisphere)	Brain GM
27378.2.0	Area of S-collat-transv-ant (left hemisphere)	Brain GM
27379.2.0	Area of S-collat-transv-post (left hemisphere)	Brain GM
27380.2.0	Area of S-front-inf (left hemisphere)	Brain GM
27381.2.0	Area of S-front-middle (left hemisphere)	Brain GM
27382.2.0	Area of S-front-sup (left hemisphere)	Brain GM
27383.2.0	Area of S-interm-prim-Jensen (left hemisphere)	Brain GM
27384.2.0	Area of S-intrapariet+P-trans (left hemisphere)	Brain GM
27385.2.0	Area of S-oc-middle+Lunatus (left hemisphere)	Brain GM
27386.2.0	Area of S-oc-sup+transversal (left hemisphere)	Brain GM
27387.2.0	Area of S-occipital-ant (left hemisphere)	Brain GM
27388.2.0	Area of S-oc-temp-lat (left hemisphere)	Brain GM
27389.2.0	Area of S-oc-temp-med+Lingual (left hemisphere)	Brain GM
27390.2.0	Area of S-orbital-lateral (left hemisphere)	Brain GM
27391.2.0	Area of S-orbital-med-olfact (left hemisphere)	Brain GM
27392.2.0	Area of S-orbital-H-Shaped (left hemisphere)	Brain GM
27393.2.0	Area of S-parieto-occipital (left hemisphere)	Brain GM
27394.2.0	Area of S-pericallosal (left hemisphere)	Brain GM
27395.2.0	Area of S-postcentral (left hemisphere)	Brain GM
27396.2.0	Area of S-precentral-inf-part (left hemisphere)	Brain GM
27397.2.0	Area of S-precentral-sup-part (left hemisphere)	Brain GM
27398.2.0	Area of S-suborbital (left hemisphere)	Brain GM
27399.2.0	Area of S-subparietal (left hemisphere)	Brain GM
27400.2.0	Area of S-temporal-inf (left hemisphere)	Brain GM
27401.2.0	Area of S-temporal-sup (left hemisphere)	Brain GM
27402.2.0	Area of S-temporal-transverse (left hemisphere)	Brain GM
27403.2.0	Mean thickness of G+S-frontomargin (left hemisphere)	Brain GM
27404.2.0	Mean thickness of G+S-occipital-inf (left hemisphere)	Brain GM
27405.2.0	Mean thickness of G+S-paracentral (left hemisphere)	Brain GM
27406.2.0	Mean thickness of G+S-subcentral (left hemisphere)	Brain GM
27407.2.0	Mean thickness of G+S-transv-frontopol (left hemisphere)	Brain GM
27408.2.0	Mean thickness of G+S-cingul-Ant (left hemisphere)	Brain GM
27409.2.0	Mean thickness of G+S-cingul-Mid-Ant (left hemisphere)	Brain GM
27410.2.0	Mean thickness of G+S-cingul-Mid-Post (left hemisphere)	Brain GM
27411.2.0	Mean thickness of G-cingul-Post-dorsal (left hemisphere)	Brain GM
27412.2.0	Mean thickness of G-cingul-Post-ventral (left hemisphere)	Brain GM
27413.2.0	Mean thickness of G-cuneus (left hemisphere)	Brain GM
27414.2.0	Mean thickness of G-front-inf-Opercular (left hemisphere)	Brain GM
27415.2.0	Mean thickness of G-front-inf-Orbital (left hemisphere)	Brain GM
27416.2.0	Mean thickness of G-front-inf-Triangul (left hemisphere)	Brain GM
27417.2.0	Mean thickness of G-front-middle (left hemisphere)	Brain GM
27418.2.0	Mean thickness of G-front-sup (left hemisphere)	Brain GM
27419.2.0	Mean thickness of G-Ins-lg+S-cent-ins (left hemisphere)	Brain GM
27420.2.0	Mean thickness of G-insular-short (left hemisphere)	Brain GM
27421.2.0	Mean thickness of G-occipital-middle (left hemisphere)	Brain GM
27422.2.0	Mean thickness of G-occipital-sup (left hemisphere)	Brain GM
27423.2.0	Mean thickness of G-oc-temp-lat-fusifor (left hemisphere)	Brain GM
27424.2.0	Mean thickness of G-oc-temp-med-Lingual (left hemisphere)	Brain GM
27425.2.0	Mean thickness of G-oc-temp-med-Parahip (left hemisphere)	Brain GM
27426.2.0	Mean thickness of G-orbital (left hemisphere)	Brain GM
27427.2.0	Mean thickness of G-pariet-inf-Angular (left hemisphere)	Brain GM
27428.2.0	Mean thickness of G-pariet-inf-Supramar (left hemisphere)	Brain GM
27429.2.0	Mean thickness of G-parietal-sup (left hemisphere)	Brain GM
27430.2.0	Mean thickness of G-postcentral (left hemisphere)	Brain GM
27431.2.0	Mean thickness of G-precentral (left hemisphere)	Brain GM
27432.2.0	Mean thickness of G-precuneus (left hemisphere)	Brain GM
27433.2.0	Mean thickness of G-rectus (left hemisphere)	Brain GM
27434.2.0	Mean thickness of G-subcallosal (left hemisphere)	Brain GM
27435.2.0	Mean thickness of G-temp-sup-G-T-transv (left hemisphere)	Brain GM
27436.2.0	Mean thickness of G-temp-sup-Lateral (left hemisphere)	Brain GM
27437.2.0	Mean thickness of G-temp-sup-Plan-polar (left hemisphere)	Brain GM
27438.2.0	Mean thickness of G-temp-sup-Plan-tempo (left hemisphere)	Brain GM
27439.2.0	Mean thickness of G-temporal-inf (left hemisphere)	Brain GM
27440.2.0	Mean thickness of G-temporal-middle (left hemisphere)	Brain GM
27441.2.0	Mean thickness of Lat-Fis-ant-Horizont (left hemisphere)	Brain GM
27442.2.0	Mean thickness of Lat-Fis-ant-Vertical (left hemisphere)	Brain GM
27443.2.0	Mean thickness of Lat-Fis-post (left hemisphere)	Brain GM
27444.2.0	Mean thickness of Pole-occipital (left hemisphere)	Brain GM
27445.2.0	Mean thickness of Pole-temporal (left hemisphere)	Brain GM
27446.2.0	Mean thickness of S-calcarine (left hemisphere)	Brain GM
27447.2.0	Mean thickness of S-central (left hemisphere)	Brain GM
27448.2.0	Mean thickness of S-cingul-Marginalis (left hemisphere)	Brain GM
27449.2.0	Mean thickness of S-circular-insula-ant (left hemisphere)	Brain GM
27450.2.0	Mean thickness of S-circular-insula-inf (left hemisphere)	Brain GM
27451.2.0	Mean thickness of S-circular-insula-sup (left hemisphere)	Brain GM
27452.2.0	Mean thickness of S-collat-transv-ant (left hemisphere)	Brain GM
27453.2.0	Mean thickness of S-collat-transv-post (left hemisphere)	Brain GM
27454.2.0	Mean thickness of S-front-inf (left hemisphere)	Brain GM
27455.2.0	Mean thickness of S-front-middle (left hemisphere)	Brain GM
27456.2.0	Mean thickness of S-front-sup (left hemisphere)	Brain GM
27457.2.0	Mean thickness of S-interm-prim-Jensen (left hemisphere)	Brain GM
27458.2.0	Mean thickness of S-intrapariet+P-trans (left hemisphere)	Brain GM
27459.2.0	Mean thickness of S-oc-middle+Lunatus (left hemisphere)	Brain GM
27460.2.0	Mean thickness of S-oc-sup+transversal (left hemisphere)	Brain GM
27461.2.0	Mean thickness of S-occipital-ant (left hemisphere)	Brain GM
27462.2.0	Mean thickness of S-oc-temp-lat (left hemisphere)	Brain GM
27463.2.0	Mean thickness of S-oc-temp-med+Lingual (left hemisphere)	Brain GM
27464.2.0	Mean thickness of S-orbital-lateral (left hemisphere)	Brain GM
27465.2.0	Mean thickness of S-orbital-med-olfact (left hemisphere)	Brain GM
27466.2.0	Mean thickness of S-orbital-H-Shaped (left hemisphere)	Brain GM
27467.2.0	Mean thickness of S-parieto-occipital (left hemisphere)	Brain GM
27468.2.0	Mean thickness of S-pericallosal (left hemisphere)	Brain GM
27469.2.0	Mean thickness of S-postcentral (left hemisphere)	Brain GM
27470.2.0	Mean thickness of S-precentral-inf-part (left hemisphere)	Brain GM
27471.2.0	Mean thickness of S-precentral-sup-part (left hemisphere)	Brain GM
27472.2.0	Mean thickness of S-suborbital (left hemisphere)	Brain GM
27473.2.0	Mean thickness of S-subparietal (left hemisphere)	Brain GM
27474.2.0	Mean thickness of S-temporal-inf (left hemisphere)	Brain GM
27475.2.0	Mean thickness of S-temporal-sup (left hemisphere)	Brain GM
27476.2.0	Mean thickness of S-temporal-transverse (left hemisphere)	Brain GM
27477.2.0	Volume of G+S-frontomargin (left hemisphere)	Brain GM
27478.2.0	Volume of G+S-occipital-inf (left hemisphere)	Brain GM
27479.2.0	Volume of G+S-paracentral (left hemisphere)	Brain GM
27480.2.0	Volume of G+S-subcentral (left hemisphere)	Brain GM
27481.2.0	Volume of G+S-transv-frontopol (left hemisphere)	Brain GM
27482.2.0	Volume of G+S-cingul-Ant (left hemisphere)	Brain GM
27483.2.0	Volume of G+S-cingul-Mid-Ant (left hemisphere)	Brain GM
27484.2.0	Volume of G+S-cingul-Mid-Post (left hemisphere)	Brain GM
27485.2.0	Volume of G-cingul-Post-dorsal (left hemisphere)	Brain GM
27486.2.0	Volume of G-cingul-Post-ventral (left hemisphere)	Brain GM
27487.2.0	Volume of G-cuneus (left hemisphere)	Brain GM
27488.2.0	Volume of G-front-inf-Opercular (left hemisphere)	Brain GM
27489.2.0	Volume of G-front-inf-Orbital (left hemisphere)	Brain GM
27490.2.0	Volume of G-front-inf-Triangul (left hemisphere)	Brain GM
27491.2.0	Volume of G-front-middle (left hemisphere)	Brain GM
27492.2.0	Volume of G-front-sup (left hemisphere)	Brain GM
27493.2.0	Volume of G-Ins-lg+S-cent-ins (left hemisphere)	Brain GM
27494.2.0	Volume of G-insular-short (left hemisphere)	Brain GM
27495.2.0	Volume of G-occipital-middle (left hemisphere)	Brain GM
27496.2.0	Volume of G-occipital-sup (left hemisphere)	Brain GM
27497.2.0	Volume of G-oc-temp-lat-fusifor (left hemisphere)	Brain GM
27498.2.0	Volume of G-oc-temp-med-Lingual (left hemisphere)	Brain GM
27499.2.0	Volume of G-oc-temp-med-Parahip (left hemisphere)	Brain GM
27500.2.0	Volume of G-orbital (left hemisphere)	Brain GM
27501.2.0	Volume of G-pariet-inf-Angular (left hemisphere)	Brain GM
27502.2.0	Volume of G-pariet-inf-Supramar (left hemisphere)	Brain GM
27503.2.0	Volume of G-parietal-sup (left hemisphere)	Brain GM
27504.2.0	Volume of G-postcentral (left hemisphere)	Brain GM
27505.2.0	Volume of G-precentral (left hemisphere)	Brain GM
27506.2.0	Volume of G-precuneus (left hemisphere)	Brain GM
27507.2.0	Volume of G-rectus (left hemisphere)	Brain GM
27508.2.0	Volume of G-subcallosal (left hemisphere)	Brain GM
27509.2.0	Volume of G-temp-sup-G-T-transv (left hemisphere)	Brain GM
27510.2.0	Volume of G-temp-sup-Lateral (left hemisphere)	Brain GM
27511.2.0	Volume of G-temp-sup-Plan-polar (left hemisphere)	Brain GM
27512.2.0	Volume of G-temp-sup-Plan-tempo (left hemisphere)	Brain GM
27513.2.0	Volume of G-temporal-inf (left hemisphere)	Brain GM
27514.2.0	Volume of G-temporal-middle (left hemisphere)	Brain GM
27515.2.0	Volume of Lat-Fis-ant-Horizont (left hemisphere)	Brain GM
27516.2.0	Volume of Lat-Fis-ant-Vertical (left hemisphere)	Brain GM
27517.2.0	Volume of Lat-Fis-post (left hemisphere)	Brain GM
27518.2.0	Volume of Pole-occipital (left hemisphere)	Brain GM
27519.2.0	Volume of Pole-temporal (left hemisphere)	Brain GM
27520.2.0	Volume of S-calcarine (left hemisphere)	Brain GM
27521.2.0	Volume of S-central (left hemisphere)	Brain GM
27522.2.0	Volume of S-cingul-Marginalis (left hemisphere)	Brain GM
27523.2.0	Volume of S-circular-insula-ant (left hemisphere)	Brain GM
27524.2.0	Volume of S-circular-insula-inf (left hemisphere)	Brain GM
27525.2.0	Volume of S-circular-insula-sup (left hemisphere)	Brain GM
27526.2.0	Volume of S-collat-transv-ant (left hemisphere)	Brain GM
27527.2.0	Volume of S-collat-transv-post (left hemisphere)	Brain GM
27528.2.0	Volume of S-front-inf (left hemisphere)	Brain GM
27529.2.0	Volume of S-front-middle (left hemisphere)	Brain GM
27530.2.0	Volume of S-front-sup (left hemisphere)	Brain GM
27531.2.0	Volume of S-interm-prim-Jensen (left hemisphere)	Brain GM
27532.2.0	Volume of S-intrapariet+P-trans (left hemisphere)	Brain GM
27533.2.0	Volume of S-oc-middle+Lunatus (left hemisphere)	Brain GM
27534.2.0	Volume of S-oc-sup+transversal (left hemisphere)	Brain GM
27535.2.0	Volume of S-occipital-ant (left hemisphere)	Brain GM
27536.2.0	Volume of S-oc-temp-lat (left hemisphere)	Brain GM
27537.2.0	Volume of S-oc-temp-med+Lingual (left hemisphere)	Brain GM
27538.2.0	Volume of S-orbital-lateral (left hemisphere)	Brain GM
27539.2.0	Volume of S-orbital-med-olfact (left hemisphere)	Brain GM
27540.2.0	Volume of S-orbital-H-Shaped (left hemisphere)	Brain GM
27541.2.0	Volume of S-parieto-occipital (left hemisphere)	Brain GM
27542.2.0	Volume of S-pericallosal (left hemisphere)	Brain GM
27543.2.0	Volume of S-postcentral (left hemisphere)	Brain GM
27544.2.0	Volume of S-precentral-inf-part (left hemisphere)	Brain GM
27545.2.0	Volume of S-precentral-sup-part (left hemisphere)	Brain GM
27546.2.0	Volume of S-suborbital (left hemisphere)	Brain GM
27547.2.0	Volume of S-subparietal (left hemisphere)	Brain GM
27548.2.0	Volume of S-temporal-inf (left hemisphere)	Brain GM
27549.2.0	Volume of S-temporal-sup (left hemisphere)	Brain GM
27550.2.0	Volume of S-temporal-transverse (left hemisphere)	Brain GM
27551.2.0	Area of G+S-frontomargin (right hemisphere)	Brain GM
27552.2.0	Area of G+S-occipital-inf (right hemisphere)	Brain GM
27553.2.0	Area of G+S-paracentral (right hemisphere)	Brain GM
27554.2.0	Area of G+S-subcentral (right hemisphere)	Brain GM
27555.2.0	Area of G+S-transv-frontopol (right hemisphere)	Brain GM
27556.2.0	Area of G+S-cingul-Ant (right hemisphere)	Brain GM
27557.2.0	Area of G+S-cingul-Mid-Ant (right hemisphere)	Brain GM
27558.2.0	Area of G+S-cingul-Mid-Post (right hemisphere)	Brain GM
27559.2.0	Area of G-cingul-Post-dorsal (right hemisphere)	Brain GM
27560.2.0	Area of G-cingul-Post-ventral (right hemisphere)	Brain GM
27561.2.0	Area of G-cuneus (right hemisphere)	Brain GM
27562.2.0	Area of G-front-inf-Opercular (right hemisphere)	Brain GM
27563.2.0	Area of G-front-inf-Orbital (right hemisphere)	Brain GM
27564.2.0	Area of G-front-inf-Triangul (right hemisphere)	Brain GM
27565.2.0	Area of G-front-middle (right hemisphere)	Brain GM
27566.2.0	Area of G-front-sup (right hemisphere)	Brain GM
27567.2.0	Area of G-Ins-lg+S-cent-ins (right hemisphere)	Brain GM
27568.2.0	Area of G-insular-short (right hemisphere)	Brain GM
27569.2.0	Area of G-occipital-middle (right hemisphere)	Brain GM
27570.2.0	Area of G-occipital-sup (right hemisphere)	Brain GM
27571.2.0	Area of G-oc-temp-lat-fusifor (right hemisphere)	Brain GM
27572.2.0	Area of G-oc-temp-med-Lingual (right hemisphere)	Brain GM
27573.2.0	Area of G-oc-temp-med-Parahip (right hemisphere)	Brain GM
27574.2.0	Area of G-orbital (right hemisphere)	Brain GM
27575.2.0	Area of G-pariet-inf-Angular (right hemisphere)	Brain GM
27576.2.0	Area of G-pariet-inf-Supramar (right hemisphere)	Brain GM
27577.2.0	Area of G-parietal-sup (right hemisphere)	Brain GM
27578.2.0	Area of G-postcentral (right hemisphere)	Brain GM
27579.2.0	Area of G-precentral (right hemisphere)	Brain GM
27580.2.0	Area of G-precuneus (right hemisphere)	Brain GM
27581.2.0	Area of G-rectus (right hemisphere)	Brain GM
27582.2.0	Area of G-subcallosal (right hemisphere)	Brain GM
27583.2.0	Area of G-temp-sup-G-T-transv (right hemisphere)	Brain GM
27584.2.0	Area of G-temp-sup-Lateral (right hemisphere)	Brain GM
27585.2.0	Area of G-temp-sup-Plan-polar (right hemisphere)	Brain GM
27586.2.0	Area of G-temp-sup-Plan-tempo (right hemisphere)	Brain GM
27587.2.0	Area of G-temporal-inf (right hemisphere)	Brain GM
27588.2.0	Area of G-temporal-middle (right hemisphere)	Brain GM
27589.2.0	Area of Lat-Fis-ant-Horizont (right hemisphere)	Brain GM
27590.2.0	Area of Lat-Fis-ant-Vertical (right hemisphere)	Brain GM
27591.2.0	Area of Lat-Fis-post (right hemisphere)	Brain GM
27592.2.0	Area of Pole-occipital (right hemisphere)	Brain GM
27593.2.0	Area of Pole-temporal (right hemisphere)	Brain GM
27594.2.0	Area of S-calcarine (right hemisphere)	Brain GM
27595.2.0	Area of S-central (right hemisphere)	Brain GM
27596.2.0	Area of S-cingul-Marginalis (right hemisphere)	Brain GM
27597.2.0	Area of S-circular-insula-ant (right hemisphere)	Brain GM
27598.2.0	Area of S-circular-insula-inf (right hemisphere)	Brain GM
27599.2.0	Area of S-circular-insula-sup (right hemisphere)	Brain GM
27600.2.0	Area of S-collat-transv-ant (right hemisphere)	Brain GM
27601.2.0	Area of S-collat-transv-post (right hemisphere)	Brain GM
27602.2.0	Area of S-front-inf (right hemisphere)	Brain GM
27603.2.0	Area of S-front-middle (right hemisphere)	Brain GM
27604.2.0	Area of S-front-sup (right hemisphere)	Brain GM
27605.2.0	Area of S-interm-prim-Jensen (right hemisphere)	Brain GM
27606.2.0	Area of S-intrapariet+P-trans (right hemisphere)	Brain GM
27607.2.0	Area of S-oc-middle+Lunatus (right hemisphere)	Brain GM
27608.2.0	Area of S-oc-sup+transversal (right hemisphere)	Brain GM
27609.2.0	Area of S-occipital-ant (right hemisphere)	Brain GM
27610.2.0	Area of S-oc-temp-lat (right hemisphere)	Brain GM
27611.2.0	Area of S-oc-temp-med+Lingual (right hemisphere)	Brain GM
27612.2.0	Area of S-orbital-lateral (right hemisphere)	Brain GM
27613.2.0	Area of S-orbital-med-olfact (right hemisphere)	Brain GM
27614.2.0	Area of S-orbital-H-Shaped (right hemisphere)	Brain GM
27615.2.0	Area of S-parieto-occipital (right hemisphere)	Brain GM
27616.2.0	Area of S-pericallosal (right hemisphere)	Brain GM
27617.2.0	Area of S-postcentral (right hemisphere)	Brain GM
27618.2.0	Area of S-precentral-inf-part (right hemisphere)	Brain GM
27619.2.0	Area of S-precentral-sup-part (right hemisphere)	Brain GM
27620.2.0	Area of S-suborbital (right hemisphere)	Brain GM
27621.2.0	Area of S-subparietal (right hemisphere)	Brain GM
27622.2.0	Area of S-temporal-inf (right hemisphere)	Brain GM
27623.2.0	Area of S-temporal-sup (right hemisphere)	Brain GM
27624.2.0	Area of S-temporal-transverse (right hemisphere)	Brain GM
27625.2.0	Mean thickness of G+S-frontomargin (right hemisphere)	Brain GM
27626.2.0	Mean thickness of G+S-occipital-inf (right hemisphere)	Brain GM
27627.2.0	Mean thickness of G+S-paracentral (right hemisphere)	Brain GM
27628.2.0	Mean thickness of G+S-subcentral (right hemisphere)	Brain GM
27629.2.0	Mean thickness of G+S-transv-frontopol (right hemisphere)	Brain GM
27630.2.0	Mean thickness of G+S-cingul-Ant (right hemisphere)	Brain GM
27631.2.0	Mean thickness of G+S-cingul-Mid-Ant (right hemisphere)	Brain GM
27632.2.0	Mean thickness of G+S-cingul-Mid-Post (right hemisphere)	Brain GM
27633.2.0	Mean thickness of G-cingul-Post-dorsal (right hemisphere)	Brain GM
27634.2.0	Mean thickness of G-cingul-Post-ventral (right hemisphere)	Brain GM
27635.2.0	Mean thickness of G-cuneus (right hemisphere)	Brain GM
27636.2.0	Mean thickness of G-front-inf-Opercular (right hemisphere)	Brain GM
27637.2.0	Mean thickness of G-front-inf-Orbital (right hemisphere)	Brain GM
27638.2.0	Mean thickness of G-front-inf-Triangul (right hemisphere)	Brain GM
27639.2.0	Mean thickness of G-front-middle (right hemisphere)	Brain GM
27640.2.0	Mean thickness of G-front-sup (right hemisphere)	Brain GM
27641.2.0	Mean thickness of G-Ins-lg+S-cent-ins (right hemisphere)	Brain GM
27642.2.0	Mean thickness of G-insular-short (right hemisphere)	Brain GM
27643.2.0	Mean thickness of G-occipital-middle (right hemisphere)	Brain GM
27644.2.0	Mean thickness of G-occipital-sup (right hemisphere)	Brain GM
27645.2.0	Mean thickness of G-oc-temp-lat-fusifor (right hemisphere)	Brain GM
27646.2.0	Mean thickness of G-oc-temp-med-Lingual (right hemisphere)	Brain GM
27647.2.0	Mean thickness of G-oc-temp-med-Parahip (right hemisphere)	Brain GM
27648.2.0	Mean thickness of G-orbital (right hemisphere)	Brain GM
27649.2.0	Mean thickness of G-pariet-inf-Angular (right hemisphere)	Brain GM
27650.2.0	Mean thickness of G-pariet-inf-Supramar (right hemisphere)	Brain GM
27651.2.0	Mean thickness of G-parietal-sup (right hemisphere)	Brain GM
27652.2.0	Mean thickness of G-postcentral (right hemisphere)	Brain GM
27653.2.0	Mean thickness of G-precentral (right hemisphere)	Brain GM
27654.2.0	Mean thickness of G-precuneus (right hemisphere)	Brain GM
27655.2.0	Mean thickness of G-rectus (right hemisphere)	Brain GM
27656.2.0	Mean thickness of G-subcallosal (right hemisphere)	Brain GM
27657.2.0	Mean thickness of G-temp-sup-G-T-transv (right hemisphere)	Brain GM
27658.2.0	Mean thickness of G-temp-sup-Lateral (right hemisphere)	Brain GM
27659.2.0	Mean thickness of G-temp-sup-Plan-polar (right hemisphere)	Brain GM
27660.2.0	Mean thickness of G-temp-sup-Plan-tempo (right hemisphere)	Brain GM
27661.2.0	Mean thickness of G-temporal-inf (right hemisphere)	Brain GM
27662.2.0	Mean thickness of G-temporal-middle (right hemisphere)	Brain GM
27663.2.0	Mean thickness of Lat-Fis-ant-Horizont (right hemisphere)	Brain GM
27664.2.0	Mean thickness of Lat-Fis-ant-Vertical (right hemisphere)	Brain GM
27665.2.0	Mean thickness of Lat-Fis-post (right hemisphere)	Brain GM
27666.2.0	Mean thickness of Pole-occipital (right hemisphere)	Brain GM
27667.2.0	Mean thickness of Pole-temporal (right hemisphere)	Brain GM
27668.2.0	Mean thickness of S-calcarine (right hemisphere)	Brain GM
27669.2.0	Mean thickness of S-central (right hemisphere)	Brain GM
27670.2.0	Mean thickness of S-cingul-Marginalis (right hemisphere)	Brain GM
27671.2.0	Mean thickness of S-circular-insula-ant (right hemisphere)	Brain GM
27672.2.0	Mean thickness of S-circular-insula-inf (right hemisphere)	Brain GM
27673.2.0	Mean thickness of S-circular-insula-sup (right hemisphere)	Brain GM
27674.2.0	Mean thickness of S-collat-transv-ant (right hemisphere)	Brain GM
27675.2.0	Mean thickness of S-collat-transv-post (right hemisphere)	Brain GM
27676.2.0	Mean thickness of S-front-inf (right hemisphere)	Brain GM
27677.2.0	Mean thickness of S-front-middle (right hemisphere)	Brain GM
27678.2.0	Mean thickness of S-front-sup (right hemisphere)	Brain GM
27679.2.0	Mean thickness of S-interm-prim-Jensen (right hemisphere)	Brain GM
27680.2.0	Mean thickness of S-intrapariet+P-trans (right hemisphere)	Brain GM
27681.2.0	Mean thickness of S-oc-middle+Lunatus (right hemisphere)	Brain GM
27682.2.0	Mean thickness of S-oc-sup+transversal (right hemisphere)	Brain GM
27683.2.0	Mean thickness of S-occipital-ant (right hemisphere)	Brain GM
27684.2.0	Mean thickness of S-oc-temp-lat (right hemisphere)	Brain GM
27685.2.0	Mean thickness of S-oc-temp-med+Lingual (right hemisphere)	Brain GM
27686.2.0	Mean thickness of S-orbital-lateral (right hemisphere)	Brain GM
27687.2.0	Mean thickness of S-orbital-med-olfact (right hemisphere)	Brain GM
27688.2.0	Mean thickness of S-orbital-H-Shaped (right hemisphere)	Brain GM
27689.2.0	Mean thickness of S-parieto-occipital (right hemisphere)	Brain GM
27690.2.0	Mean thickness of S-pericallosal (right hemisphere)	Brain GM
27691.2.0	Mean thickness of S-postcentral (right hemisphere)	Brain GM
27692.2.0	Mean thickness of S-precentral-inf-part (right hemisphere)	Brain GM
27693.2.0	Mean thickness of S-precentral-sup-part (right hemisphere)	Brain GM
27694.2.0	Mean thickness of S-suborbital (right hemisphere)	Brain GM
27695.2.0	Mean thickness of S-subparietal (right hemisphere)	Brain GM
27696.2.0	Mean thickness of S-temporal-inf (right hemisphere)	Brain GM
27697.2.0	Mean thickness of S-temporal-sup (right hemisphere)	Brain GM
27698.2.0	Mean thickness of S-temporal-transverse (right hemisphere)	Brain GM
27699.2.0	Volume of G+S-frontomargin (right hemisphere)	Brain GM
27700.2.0	Volume of G+S-occipital-inf (right hemisphere)	Brain GM
27701.2.0	Volume of G+S-paracentral (right hemisphere)	Brain GM
27702.2.0	Volume of G+S-subcentral (right hemisphere)	Brain GM
27703.2.0	Volume of G+S-transv-frontopol (right hemisphere)	Brain GM
27704.2.0	Volume of G+S-cingul-Ant (right hemisphere)	Brain GM
27705.2.0	Volume of G+S-cingul-Mid-Ant (right hemisphere)	Brain GM
27706.2.0	Volume of G+S-cingul-Mid-Post (right hemisphere)	Brain GM
27707.2.0	Volume of G-cingul-Post-dorsal (right hemisphere)	Brain GM
27708.2.0	Volume of G-cingul-Post-ventral (right hemisphere)	Brain GM
27709.2.0	Volume of G-cuneus (right hemisphere)	Brain GM
27710.2.0	Volume of G-front-inf-Opercular (right hemisphere)	Brain GM
27711.2.0	Volume of G-front-inf-Orbital (right hemisphere)	Brain GM
27712.2.0	Volume of G-front-inf-Triangul (right hemisphere)	Brain GM
27713.2.0	Volume of G-front-middle (right hemisphere)	Brain GM
27714.2.0	Volume of G-front-sup (right hemisphere)	Brain GM
27715.2.0	Volume of G-Ins-lg+S-cent-ins (right hemisphere)	Brain GM
27716.2.0	Volume of G-insular-short (right hemisphere)	Brain GM
27717.2.0	Volume of G-occipital-middle (right hemisphere)	Brain GM
27718.2.0	Volume of G-occipital-sup (right hemisphere)	Brain GM
27719.2.0	Volume of G-oc-temp-lat-fusifor (right hemisphere)	Brain GM
27720.2.0	Volume of G-oc-temp-med-Lingual (right hemisphere)	Brain GM
27721.2.0	Volume of G-oc-temp-med-Parahip (right hemisphere)	Brain GM
27722.2.0	Volume of G-orbital (right hemisphere)	Brain GM
27723.2.0	Volume of G-pariet-inf-Angular (right hemisphere)	Brain GM
27724.2.0	Volume of G-pariet-inf-Supramar (right hemisphere)	Brain GM
27725.2.0	Volume of G-parietal-sup (right hemisphere)	Brain GM
27726.2.0	Volume of G-postcentral (right hemisphere)	Brain GM
27727.2.0	Volume of G-precentral (right hemisphere)	Brain GM
27728.2.0	Volume of G-precuneus (right hemisphere)	Brain GM
27729.2.0	Volume of G-rectus (right hemisphere)	Brain GM
27730.2.0	Volume of G-subcallosal (right hemisphere)	Brain GM
27731.2.0	Volume of G-temp-sup-G-T-transv (right hemisphere)	Brain GM
27732.2.0	Volume of G-temp-sup-Lateral (right hemisphere)	Brain GM
27733.2.0	Volume of G-temp-sup-Plan-polar (right hemisphere)	Brain GM
27734.2.0	Volume of G-temp-sup-Plan-tempo (right hemisphere)	Brain GM
27735.2.0	Volume of G-temporal-inf (right hemisphere)	Brain GM
27736.2.0	Volume of G-temporal-middle (right hemisphere)	Brain GM
27737.2.0	Volume of Lat-Fis-ant-Horizont (right hemisphere)	Brain GM
27738.2.0	Volume of Lat-Fis-ant-Vertical (right hemisphere)	Brain GM
27739.2.0	Volume of Lat-Fis-post (right hemisphere)	Brain GM
27740.2.0	Volume of Pole-occipital (right hemisphere)	Brain GM
27741.2.0	Volume of Pole-temporal (right hemisphere)	Brain GM
27742.2.0	Volume of S-calcarine (right hemisphere)	Brain GM
27743.2.0	Volume of S-central (right hemisphere)	Brain GM
27744.2.0	Volume of S-cingul-Marginalis (right hemisphere)	Brain GM
27745.2.0	Volume of S-circular-insula-ant (right hemisphere)	Brain GM
27746.2.0	Volume of S-circular-insula-inf (right hemisphere)	Brain GM
27747.2.0	Volume of S-circular-insula-sup (right hemisphere)	Brain GM
27748.2.0	Volume of S-collat-transv-ant (right hemisphere)	Brain GM
27749.2.0	Volume of S-collat-transv-post (right hemisphere)	Brain GM
27750.2.0	Volume of S-front-inf (right hemisphere)	Brain GM
27751.2.0	Volume of S-front-middle (right hemisphere)	Brain GM
27752.2.0	Volume of S-front-sup (right hemisphere)	Brain GM
27753.2.0	Volume of S-interm-prim-Jensen (right hemisphere)	Brain GM
27754.2.0	Volume of S-intrapariet+P-trans (right hemisphere)	Brain GM
27755.2.0	Volume of S-oc-middle+Lunatus (right hemisphere)	Brain GM
27756.2.0	Volume of S-oc-sup+transversal (right hemisphere)	Brain GM
27757.2.0	Volume of S-occipital-ant (right hemisphere)	Brain GM
27758.2.0	Volume of S-oc-temp-lat (right hemisphere)	Brain GM
27759.2.0	Volume of S-oc-temp-med+Lingual (right hemisphere)	Brain GM
27760.2.0	Volume of S-orbital-lateral (right hemisphere)	Brain GM
27761.2.0	Volume of S-orbital-med-olfact (right hemisphere)	Brain GM
27762.2.0	Volume of S-orbital-H-Shaped (right hemisphere)	Brain GM
27763.2.0	Volume of S-parieto-occipital (right hemisphere)	Brain GM
27764.2.0	Volume of S-pericallosal (right hemisphere)	Brain GM
27765.2.0	Volume of S-postcentral (right hemisphere)	Brain GM
27766.2.0	Volume of S-precentral-inf-part (right hemisphere)	Brain GM
27767.2.0	Volume of S-precentral-sup-part (right hemisphere)	Brain GM
27768.2.0	Volume of S-suborbital (right hemisphere)	Brain GM
27769.2.0	Volume of S-subparietal (right hemisphere)	Brain GM
27770.2.0	Volume of S-temporal-inf (right hemisphere)	Brain GM
27771.2.0	Volume of S-temporal-sup (right hemisphere)	Brain GM
27772.2.0	Volume of S-temporal-transverse (right hemisphere)	Brain GM
X25008.2.0	Volume of white matter	Brain WM
X25056.2.0	Mean FA in middle cerebellar peduncle on FA skeleton	Brain WM
X25057.2.0	Mean FA in pontine crossing tract on FA skeleton	Brain WM
X25058.2.0	Mean FA in genu of corpus callosum on FA skeleton	Brain WM
X25059.2.0	Mean FA in body of corpus callosum on FA skeleton	Brain WM
X25060.2.0	Mean FA in splenium of corpus callosum on FA skeleton	Brain WM
X25061.2.0	Mean FA in fornix on FA skeleton	Brain WM
X25062.2.0	Mean FA in corticospinal tract on FA skeleton (right)	Brain WM
X25063.2.0	Mean FA in corticospinal tract on FA skeleton (left)	Brain WM
X25064.2.0	Mean FA in medial lemniscus on FA skeleton (right)	Brain WM
X25065.2.0	Mean FA in medial lemniscus on FA skeleton (left)	Brain WM
X25066.2.0	Mean FA in inferior cerebellar peduncle on FA skeleton (right)	Brain WM
X25067.2.0	Mean FA in inferior cerebellar peduncle on FA skeleton (left)	Brain WM
X25068.2.0	Mean FA in superior cerebellar peduncle on FA skeleton (right)	Brain WM
X25069.2.0	Mean FA in superior cerebellar peduncle on FA skeleton (left)	Brain WM
X25070.2.0	Mean FA in cerebral peduncle on FA skeleton (right)	Brain WM
X25071.2.0	Mean FA in cerebral peduncle on FA skeleton (left)	Brain WM
X25072.2.0	Mean FA in anterior limb of internal capsule on FA skeleton (right)	Brain WM
X25073.2.0	Mean FA in anterior limb of internal capsule on FA skeleton (left)	Brain WM
X25074.2.0	Mean FA in posterior limb of internal capsule on FA skeleton (right)	Brain WM
X25075.2.0	Mean FA in posterior limb of internal capsule on FA skeleton (left)	Brain WM
X25076.2.0	Mean FA in retrolenticular part of internal capsule on FA skeleton (right)	Brain WM
X25077.2.0	Mean FA in retrolenticular part of internal capsule on FA skeleton (left)	Brain WM
X25078.2.0	Mean FA in anterior corona radiata on FA skeleton (right)	Brain WM
X25079.2.0	Mean FA in anterior corona radiata on FA skeleton (left)	Brain WM
X25080.2.0	Mean FA in superior corona radiata on FA skeleton (right)	Brain WM
X25081.2.0	Mean FA in superior corona radiata on FA skeleton (left)	Brain WM
X25082.2.0	Mean FA in posterior corona radiata on FA skeleton (right)	Brain WM
X25083.2.0	Mean FA in posterior corona radiata on FA skeleton (left)	Brain WM
X25084.2.0	Mean FA in posterior thalamic radiation on FA skeleton (right)	Brain WM
X25085.2.0	Mean FA in posterior thalamic radiation on FA skeleton (left)	Brain WM
X25086.2.0	Mean FA in sagittal stratum on FA skeleton (right)	Brain WM
X25087.2.0	Mean FA in sagittal stratum on FA skeleton (left)	Brain WM
X25088.2.0	Mean FA in external capsule on FA skeleton (right)	Brain WM
X25089.2.0	Mean FA in external capsule on FA skeleton (left)	Brain WM
X25090.2.0	Mean FA in cingulum cingulate gyrus on FA skeleton (right)	Brain WM
X25091.2.0	Mean FA in cingulum cingulate gyrus on FA skeleton (left)	Brain WM
X25092.2.0	Mean FA in cingulum hippocampus on FA skeleton (right)	Brain WM
X25093.2.0	Mean FA in cingulum hippocampus on FA skeleton (left)	Brain WM
X25094.2.0	Mean FA in fornix cres+stria terminalis on FA skeleton (right)	Brain WM
X25095.2.0	Mean FA in fornix cres+stria terminalis on FA skeleton (left)	Brain WM
X25096.2.0	Mean FA in superior longitudinal fasciculus on FA skeleton (right)	Brain WM
X25097.2.0	Mean FA in superior longitudinal fasciculus on FA skeleton (left)	Brain WM
X25098.2.0	Mean FA in superior fronto-occipital fasciculus on FA skeleton (right)	Brain WM
X25099.2.0	Mean FA in superior fronto-occipital fasciculus on FA skeleton (left)	Brain WM
X25100.2.0	Mean FA in uncinate fasciculus on FA skeleton (right)	Brain WM
X25101.2.0	Mean FA in uncinate fasciculus on FA skeleton (left)	Brain WM
X25102.2.0	Mean FA in tapetum on FA skeleton (right)	Brain WM
X25103.2.0	Mean FA in tapetum on FA skeleton (left)	Brain WM
X25104.2.0	Mean MD in middle cerebellar peduncle on FA skeleton	Brain WM
X25105.2.0	Mean MD in pontine crossing tract on FA skeleton	Brain WM
X25106.2.0	Mean MD in genu of corpus callosum on FA skeleton	Brain WM
X25107.2.0	Mean MD in body of corpus callosum on FA skeleton	Brain WM
X25108.2.0	Mean MD in splenium of corpus callosum on FA skeleton	Brain WM
X25109.2.0	Mean MD in fornix on FA skeleton	Brain WM
X25110.2.0	Mean MD in corticospinal tract on FA skeleton (right)	Brain WM
X25111.2.0	Mean MD in corticospinal tract on FA skeleton (left)	Brain WM
X25112.2.0	Mean MD in medial lemniscus on FA skeleton (right)	Brain WM
X25113.2.0	Mean MD in medial lemniscus on FA skeleton (left)	Brain WM
X25114.2.0	Mean MD in inferior cerebellar peduncle on FA skeleton (right)	Brain WM
X25115.2.0	Mean MD in inferior cerebellar peduncle on FA skeleton (left)	Brain WM
X25116.2.0	Mean MD in superior cerebellar peduncle on FA skeleton (right)	Brain WM
X25117.2.0	Mean MD in superior cerebellar peduncle on FA skeleton (left)	Brain WM
X25118.2.0	Mean MD in cerebral peduncle on FA skeleton (right)	Brain WM
X25119.2.0	Mean MD in cerebral peduncle on FA skeleton (left)	Brain WM
X25120.2.0	Mean MD in anterior limb of internal capsule on FA skeleton (right)	Brain WM
X25121.2.0	Mean MD in anterior limb of internal capsule on FA skeleton (left)	Brain WM
X25122.2.0	Mean MD in posterior limb of internal capsule on FA skeleton (right)	Brain WM
X25123.2.0	Mean MD in posterior limb of internal capsule on FA skeleton (left)	Brain WM
X25124.2.0	Mean MD in retrolenticular part of internal capsule on FA skeleton (right)	Brain WM
X25125.2.0	Mean MD in retrolenticular part of internal capsule on FA skeleton (left)	Brain WM
X25126.2.0	Mean MD in anterior corona radiata on FA skeleton (right)	Brain WM
X25127.2.0	Mean MD in anterior corona radiata on FA skeleton (left)	Brain WM
X25128.2.0	Mean MD in superior corona radiata on FA skeleton (right)	Brain WM
X25129.2.0	Mean MD in superior corona radiata on FA skeleton (left)	Brain WM
X25130.2.0	Mean MD in posterior corona radiata on FA skeleton (right)	Brain WM
X25131.2.0	Mean MD in posterior corona radiata on FA skeleton (left)	Brain WM
X25132.2.0	Mean MD in posterior thalamic radiation on FA skeleton (right)	Brain WM
X25133.2.0	Mean MD in posterior thalamic radiation on FA skeleton (left)	Brain WM
X25134.2.0	Mean MD in sagittal stratum on FA skeleton (right)	Brain WM
X25135.2.0	Mean MD in sagittal stratum on FA skeleton (left)	Brain WM
X25136.2.0	Mean MD in external capsule on FA skeleton (right)	Brain WM
X25137.2.0	Mean MD in external capsule on FA skeleton (left)	Brain WM
X25138.2.0	Mean MD in cingulum cingulate gyrus on FA skeleton (right)	Brain WM
X25139.2.0	Mean MD in cingulum cingulate gyrus on FA skeleton (left)	Brain WM
X25140.2.0	Mean MD in cingulum hippocampus on FA skeleton (right)	Brain WM
X25141.2.0	Mean MD in cingulum hippocampus on FA skeleton (left)	Brain WM
X25142.2.0	Mean MD in fornix cres+stria terminalis on FA skeleton (right)	Brain WM
X25143.2.0	Mean MD in fornix cres+stria terminalis on FA skeleton (left)	Brain WM
X25144.2.0	Mean MD in superior longitudinal fasciculus on FA skeleton (right)	Brain WM
X25145.2.0	Mean MD in superior longitudinal fasciculus on FA skeleton (left)	Brain WM
X25146.2.0	Mean MD in superior fronto-occipital fasciculus on FA skeleton (right)	Brain WM
X25147.2.0	Mean MD in superior fronto-occipital fasciculus on FA skeleton (left)	Brain WM
X25148.2.0	Mean MD in uncinate fasciculus on FA skeleton (right)	Brain WM
X25149.2.0	Mean MD in uncinate fasciculus on FA skeleton (left)	Brain WM
X25150.2.0	Mean MD in tapetum on FA skeleton (right)	Brain WM
X25151.2.0	Mean MD in tapetum on FA skeleton (left)	Brain WM
X25152.2.0	Mean MO in middle cerebellar peduncle on FA skeleton	Brain WM
X25153.2.0	Mean MO in pontine crossing tract on FA skeleton	Brain WM
X25154.2.0	Mean MO in genu of corpus callosum on FA skeleton	Brain WM
X25155.2.0	Mean MO in body of corpus callosum on FA skeleton	Brain WM
X25156.2.0	Mean MO in splenium of corpus callosum on FA skeleton	Brain WM
X25157.2.0	Mean MO in fornix on FA skeleton	Brain WM
X25158.2.0	Mean MO in corticospinal tract on FA skeleton (right)	Brain WM
X25159.2.0	Mean MO in corticospinal tract on FA skeleton (left)	Brain WM
X25160.2.0	Mean MO in medial lemniscus on FA skeleton (right)	Brain WM
X25161.2.0	Mean MO in medial lemniscus on FA skeleton (left)	Brain WM
X25162.2.0	Mean MO in inferior cerebellar peduncle on FA skeleton (right)	Brain WM
X25163.2.0	Mean MO in inferior cerebellar peduncle on FA skeleton (left)	Brain WM
X25164.2.0	Mean MO in superior cerebellar peduncle on FA skeleton (right)	Brain WM
X25165.2.0	Mean MO in superior cerebellar peduncle on FA skeleton (left)	Brain WM
X25166.2.0	Mean MO in cerebral peduncle on FA skeleton (right)	Brain WM
X25167.2.0	Mean MO in cerebral peduncle on FA skeleton (left)	Brain WM
X25168.2.0	Mean MO in anterior limb of internal capsule on FA skeleton (right)	Brain WM
X25169.2.0	Mean MO in anterior limb of internal capsule on FA skeleton (left)	Brain WM
X25170.2.0	Mean MO in posterior limb of internal capsule on FA skeleton (right)	Brain WM
X25171.2.0	Mean MO in posterior limb of internal capsule on FA skeleton (left)	Brain WM
X25172.2.0	Mean MO in retrolenticular part of internal capsule on FA skeleton (right)	Brain WM
X25173.2.0	Mean MO in retrolenticular part of internal capsule on FA skeleton (left)	Brain WM
X25174.2.0	Mean MO in anterior corona radiata on FA skeleton (right)	Brain WM
X25175.2.0	Mean MO in anterior corona radiata on FA skeleton (left)	Brain WM
X25176.2.0	Mean MO in superior corona radiata on FA skeleton (right)	Brain WM
X25177.2.0	Mean MO in superior corona radiata on FA skeleton (left)	Brain WM
X25178.2.0	Mean MO in posterior corona radiata on FA skeleton (right)	Brain WM
X25179.2.0	Mean MO in posterior corona radiata on FA skeleton (left)	Brain WM
X25180.2.0	Mean MO in posterior thalamic radiation on FA skeleton (right)	Brain WM
X25181.2.0	Mean MO in posterior thalamic radiation on FA skeleton (left)	Brain WM
X25182.2.0	Mean MO in sagittal stratum on FA skeleton (right)	Brain WM
X25183.2.0	Mean MO in sagittal stratum on FA skeleton (left)	Brain WM
X25184.2.0	Mean MO in external capsule on FA skeleton (right)	Brain WM
X25185.2.0	Mean MO in external capsule on FA skeleton (left)	Brain WM
X25186.2.0	Mean MO in cingulum cingulate gyrus on FA skeleton (right)	Brain WM
X25187.2.0	Mean MO in cingulum cingulate gyrus on FA skeleton (left)	Brain WM
X25188.2.0	Mean MO in cingulum hippocampus on FA skeleton (right)	Brain WM
X25189.2.0	Mean MO in cingulum hippocampus on FA skeleton (left)	Brain WM
X25190.2.0	Mean MO in fornix cres+stria terminalis on FA skeleton (right)	Brain WM
X25191.2.0	Mean MO in fornix cres+stria terminalis on FA skeleton (left)	Brain WM
X25192.2.0	Mean MO in superior longitudinal fasciculus on FA skeleton (right)	Brain WM
X25193.2.0	Mean MO in superior longitudinal fasciculus on FA skeleton (left)	Brain WM
X25194.2.0	Mean MO in superior fronto-occipital fasciculus on FA skeleton (right)	Brain WM
X25195.2.0	Mean MO in superior fronto-occipital fasciculus on FA skeleton (left)	Brain WM
X25196.2.0	Mean MO in uncinate fasciculus on FA skeleton (right)	Brain WM
X25197.2.0	Mean MO in uncinate fasciculus on FA skeleton (left)	Brain WM
X25198.2.0	Mean MO in tapetum on FA skeleton (right)	Brain WM
X25199.2.0	Mean MO in tapetum on FA skeleton (left)	Brain WM
X25200.2.0	Mean L1 in middle cerebellar peduncle on FA skeleton	Brain WM
X25201.2.0	Mean L1 in pontine crossing tract on FA skeleton	Brain WM
X25202.2.0	Mean L1 in genu of corpus callosum on FA skeleton	Brain WM
X25203.2.0	Mean L1 in body of corpus callosum on FA skeleton	Brain WM
X25204.2.0	Mean L1 in splenium of corpus callosum on FA skeleton	Brain WM
X25205.2.0	Mean L1 in fornix on FA skeleton	Brain WM
X25206.2.0	Mean L1 in corticospinal tract on FA skeleton (right)	Brain WM
X25207.2.0	Mean L1 in corticospinal tract on FA skeleton (left)	Brain WM
X25208.2.0	Mean L1 in medial lemniscus on FA skeleton (right)	Brain WM
X25209.2.0	Mean L1 in medial lemniscus on FA skeleton (left)	Brain WM
X25210.2.0	Mean L1 in inferior cerebellar peduncle on FA skeleton (right)	Brain WM
X25211.2.0	Mean L1 in inferior cerebellar peduncle on FA skeleton (left)	Brain WM
X25212.2.0	Mean L1 in superior cerebellar peduncle on FA skeleton (right)	Brain WM
X25213.2.0	Mean L1 in superior cerebellar peduncle on FA skeleton (left)	Brain WM
X25214.2.0	Mean L1 in cerebral peduncle on FA skeleton (right)	Brain WM
X25215.2.0	Mean L1 in cerebral peduncle on FA skeleton (left)	Brain WM
X25216.2.0	Mean L1 in anterior limb of internal capsule on FA skeleton (right)	Brain WM
X25217.2.0	Mean L1 in anterior limb of internal capsule on FA skeleton (left)	Brain WM
X25218.2.0	Mean L1 in posterior limb of internal capsule on FA skeleton (right)	Brain WM
X25219.2.0	Mean L1 in posterior limb of internal capsule on FA skeleton (left)	Brain WM
X25220.2.0	Mean L1 in retrolenticular part of internal capsule on FA skeleton (right)	Brain WM
X25221.2.0	Mean L1 in retrolenticular part of internal capsule on FA skeleton (left)	Brain WM
X25222.2.0	Mean L1 in anterior corona radiata on FA skeleton (right)	Brain WM
X25223.2.0	Mean L1 in anterior corona radiata on FA skeleton (left)	Brain WM
X25224.2.0	Mean L1 in superior corona radiata on FA skeleton (right)	Brain WM
X25225.2.0	Mean L1 in superior corona radiata on FA skeleton (left)	Brain WM
X25226.2.0	Mean L1 in posterior corona radiata on FA skeleton (right)	Brain WM
X25227.2.0	Mean L1 in posterior corona radiata on FA skeleton (left)	Brain WM
X25228.2.0	Mean L1 in posterior thalamic radiation on FA skeleton (right)	Brain WM
X25229.2.0	Mean L1 in posterior thalamic radiation on FA skeleton (left)	Brain WM
X25230.2.0	Mean L1 in sagittal stratum on FA skeleton (right)	Brain WM
X25231.2.0	Mean L1 in sagittal stratum on FA skeleton (left)	Brain WM
X25232.2.0	Mean L1 in external capsule on FA skeleton (right)	Brain WM
X25233.2.0	Mean L1 in external capsule on FA skeleton (left)	Brain WM
X25234.2.0	Mean L1 in cingulum cingulate gyrus on FA skeleton (right)	Brain WM
X25235.2.0	Mean L1 in cingulum cingulate gyrus on FA skeleton (left)	Brain WM
X25236.2.0	Mean L1 in cingulum hippocampus on FA skeleton (right)	Brain WM
X25237.2.0	Mean L1 in cingulum hippocampus on FA skeleton (left)	Brain WM
X25238.2.0	Mean L1 in fornix cres+stria terminalis on FA skeleton (right)	Brain WM
X25239.2.0	Mean L1 in fornix cres+stria terminalis on FA skeleton (left)	Brain WM
X25240.2.0	Mean L1 in superior longitudinal fasciculus on FA skeleton (right)	Brain WM
X25241.2.0	Mean L1 in superior longitudinal fasciculus on FA skeleton (left)	Brain WM
X25242.2.0	Mean L1 in superior fronto-occipital fasciculus on FA skeleton (right)	Brain WM
X25243.2.0	Mean L1 in superior fronto-occipital fasciculus on FA skeleton (left)	Brain WM
X25244.2.0	Mean L1 in uncinate fasciculus on FA skeleton (right)	Brain WM
X25245.2.0	Mean L1 in uncinate fasciculus on FA skeleton (left)	Brain WM
X25246.2.0	Mean L1 in tapetum on FA skeleton (right)	Brain WM
X25247.2.0	Mean L1 in tapetum on FA skeleton (left)	Brain WM
X25248.2.0	Mean L2 in middle cerebellar peduncle on FA skeleton	Brain WM
X25249.2.0	Mean L2 in pontine crossing tract on FA skeleton	Brain WM
X25250.2.0	Mean L2 in genu of corpus callosum on FA skeleton	Brain WM
X25251.2.0	Mean L2 in body of corpus callosum on FA skeleton	Brain WM
X25252.2.0	Mean L2 in splenium of corpus callosum on FA skeleton	Brain WM
X25253.2.0	Mean L2 in fornix on FA skeleton	Brain WM
X25254.2.0	Mean L2 in corticospinal tract on FA skeleton (right)	Brain WM
X25255.2.0	Mean L2 in corticospinal tract on FA skeleton (left)	Brain WM
X25256.2.0	Mean L2 in medial lemniscus on FA skeleton (right)	Brain WM
X25257.2.0	Mean L2 in medial lemniscus on FA skeleton (left)	Brain WM
X25258.2.0	Mean L2 in inferior cerebellar peduncle on FA skeleton (right)	Brain WM
X25259.2.0	Mean L2 in inferior cerebellar peduncle on FA skeleton (left)	Brain WM
X25260.2.0	Mean L2 in superior cerebellar peduncle on FA skeleton (right)	Brain WM
X25261.2.0	Mean L2 in superior cerebellar peduncle on FA skeleton (left)	Brain WM
X25262.2.0	Mean L2 in cerebral peduncle on FA skeleton (right)	Brain WM
X25263.2.0	Mean L2 in cerebral peduncle on FA skeleton (left)	Brain WM
X25264.2.0	Mean L2 in anterior limb of internal capsule on FA skeleton (right)	Brain WM
X25265.2.0	Mean L2 in anterior limb of internal capsule on FA skeleton (left)	Brain WM
X25266.2.0	Mean L2 in posterior limb of internal capsule on FA skeleton (right)	Brain WM
X25267.2.0	Mean L2 in posterior limb of internal capsule on FA skeleton (left)	Brain WM
X25268.2.0	Mean L2 in retrolenticular part of internal capsule on FA skeleton (right)	Brain WM
X25269.2.0	Mean L2 in retrolenticular part of internal capsule on FA skeleton (left)	Brain WM
X25270.2.0	Mean L2 in anterior corona radiata on FA skeleton (right)	Brain WM
X25271.2.0	Mean L2 in anterior corona radiata on FA skeleton (left)	Brain WM
X25272.2.0	Mean L2 in superior corona radiata on FA skeleton (right)	Brain WM
X25273.2.0	Mean L2 in superior corona radiata on FA skeleton (left)	Brain WM
X25274.2.0	Mean L2 in posterior corona radiata on FA skeleton (right)	Brain WM
X25275.2.0	Mean L2 in posterior corona radiata on FA skeleton (left)	Brain WM
X25276.2.0	Mean L2 in posterior thalamic radiation on FA skeleton (right)	Brain WM
X25277.2.0	Mean L2 in posterior thalamic radiation on FA skeleton (left)	Brain WM
X25278.2.0	Mean L2 in sagittal stratum on FA skeleton (right)	Brain WM
X25279.2.0	Mean L2 in sagittal stratum on FA skeleton (left)	Brain WM
X25280.2.0	Mean L2 in external capsule on FA skeleton (right)	Brain WM
X25281.2.0	Mean L2 in external capsule on FA skeleton (left)	Brain WM
X25282.2.0	Mean L2 in cingulum cingulate gyrus on FA skeleton (right)	Brain WM
X25283.2.0	Mean L2 in cingulum cingulate gyrus on FA skeleton (left)	Brain WM
X25284.2.0	Mean L2 in cingulum hippocampus on FA skeleton (right)	Brain WM
X25285.2.0	Mean L2 in cingulum hippocampus on FA skeleton (left)	Brain WM
X25286.2.0	Mean L2 in fornix cres+stria terminalis on FA skeleton (right)	Brain WM
X25287.2.0	Mean L2 in fornix cres+stria terminalis on FA skeleton (left)	Brain WM
X25288.2.0	Mean L2 in superior longitudinal fasciculus on FA skeleton (right)	Brain WM
X25289.2.0	Mean L2 in superior longitudinal fasciculus on FA skeleton (left)	Brain WM
X25290.2.0	Mean L2 in superior fronto-occipital fasciculus on FA skeleton (right)	Brain WM
X25291.2.0	Mean L2 in superior fronto-occipital fasciculus on FA skeleton (left)	Brain WM
X25292.2.0	Mean L2 in uncinate fasciculus on FA skeleton (right)	Brain WM
X25293.2.0	Mean L2 in uncinate fasciculus on FA skeleton (left)	Brain WM
X25294.2.0	Mean L2 in tapetum on FA skeleton (right)	Brain WM
X25295.2.0	Mean L2 in tapetum on FA skeleton (left)	Brain WM
X25296.2.0	Mean L3 in middle cerebellar peduncle on FA skeleton	Brain WM
X25297.2.0	Mean L3 in pontine crossing tract on FA skeleton	Brain WM
X25298.2.0	Mean L3 in genu of corpus callosum on FA skeleton	Brain WM
X25299.2.0	Mean L3 in body of corpus callosum on FA skeleton	Brain WM
X25300.2.0	Mean L3 in splenium of corpus callosum on FA skeleton	Brain WM
X25301.2.0	Mean L3 in fornix on FA skeleton	Brain WM
X25302.2.0	Mean L3 in corticospinal tract on FA skeleton (right)	Brain WM
X25303.2.0	Mean L3 in corticospinal tract on FA skeleton (left)	Brain WM
X25304.2.0	Mean L3 in medial lemniscus on FA skeleton (right)	Brain WM
X25305.2.0	Mean L3 in medial lemniscus on FA skeleton (left)	Brain WM
X25306.2.0	Mean L3 in inferior cerebellar peduncle on FA skeleton (right)	Brain WM
X25307.2.0	Mean L3 in inferior cerebellar peduncle on FA skeleton (left)	Brain WM
X25308.2.0	Mean L3 in superior cerebellar peduncle on FA skeleton (right)	Brain WM
X25309.2.0	Mean L3 in superior cerebellar peduncle on FA skeleton (left)	Brain WM
X25310.2.0	Mean L3 in cerebral peduncle on FA skeleton (right)	Brain WM
X25311.2.0	Mean L3 in cerebral peduncle on FA skeleton (left)	Brain WM
X25312.2.0	Mean L3 in anterior limb of internal capsule on FA skeleton (right)	Brain WM
X25313.2.0	Mean L3 in anterior limb of internal capsule on FA skeleton (left)	Brain WM
X25314.2.0	Mean L3 in posterior limb of internal capsule on FA skeleton (right)	Brain WM
X25315.2.0	Mean L3 in posterior limb of internal capsule on FA skeleton (left)	Brain WM
X25316.2.0	Mean L3 in retrolenticular part of internal capsule on FA skeleton (right)	Brain WM
X25317.2.0	Mean L3 in retrolenticular part of internal capsule on FA skeleton (left)	Brain WM
X25318.2.0	Mean L3 in anterior corona radiata on FA skeleton (right)	Brain WM
X25319.2.0	Mean L3 in anterior corona radiata on FA skeleton (left)	Brain WM
X25320.2.0	Mean L3 in superior corona radiata on FA skeleton (right)	Brain WM
X25321.2.0	Mean L3 in superior corona radiata on FA skeleton (left)	Brain WM
X25322.2.0	Mean L3 in posterior corona radiata on FA skeleton (right)	Brain WM
X25323.2.0	Mean L3 in posterior corona radiata on FA skeleton (left)	Brain WM
X25324.2.0	Mean L3 in posterior thalamic radiation on FA skeleton (right)	Brain WM
X25325.2.0	Mean L3 in posterior thalamic radiation on FA skeleton (left)	Brain WM
X25326.2.0	Mean L3 in sagittal stratum on FA skeleton (right)	Brain WM
X25327.2.0	Mean L3 in sagittal stratum on FA skeleton (left)	Brain WM
X25328.2.0	Mean L3 in external capsule on FA skeleton (right)	Brain WM
X25329.2.0	Mean L3 in external capsule on FA skeleton (left)	Brain WM
X25330.2.0	Mean L3 in cingulum cingulate gyrus on FA skeleton (right)	Brain WM
X25331.2.0	Mean L3 in cingulum cingulate gyrus on FA skeleton (left)	Brain WM
X25332.2.0	Mean L3 in cingulum hippocampus on FA skeleton (right)	Brain WM
X25333.2.0	Mean L3 in cingulum hippocampus on FA skeleton (left)	Brain WM
X25334.2.0	Mean L3 in fornix cres+stria terminalis on FA skeleton (right)	Brain WM
X25335.2.0	Mean L3 in fornix cres+stria terminalis on FA skeleton (left)	Brain WM
X25336.2.0	Mean L3 in superior longitudinal fasciculus on FA skeleton (right)	Brain WM
X25337.2.0	Mean L3 in superior longitudinal fasciculus on FA skeleton (left)	Brain WM
X25338.2.0	Mean L3 in superior fronto-occipital fasciculus on FA skeleton (right)	Brain WM
X25339.2.0	Mean L3 in superior fronto-occipital fasciculus on FA skeleton (left)	Brain WM
X25340.2.0	Mean L3 in uncinate fasciculus on FA skeleton (right)	Brain WM
X25341.2.0	Mean L3 in uncinate fasciculus on FA skeleton (left)	Brain WM
X25342.2.0	Mean L3 in tapetum on FA skeleton (right)	Brain WM
X25343.2.0	Mean L3 in tapetum on FA skeleton (left)	Brain WM
X25344.2.0	Mean ICVF in middle cerebellar peduncle on FA skeleton	Brain WM
X25345.2.0	Mean ICVF in pontine crossing tract on FA skeleton	Brain WM
X25346.2.0	Mean ICVF in genu of corpus callosum on FA skeleton	Brain WM
X25347.2.0	Mean ICVF in body of corpus callosum on FA skeleton	Brain WM
X25348.2.0	Mean ICVF in splenium of corpus callosum on FA skeleton	Brain WM
X25349.2.0	Mean ICVF in fornix on FA skeleton	Brain WM
X25350.2.0	Mean ICVF in corticospinal tract on FA skeleton (right)	Brain WM
X25351.2.0	Mean ICVF in corticospinal tract on FA skeleton (left)	Brain WM
X25352.2.0	Mean ICVF in medial lemniscus on FA skeleton (right)	Brain WM
X25353.2.0	Mean ICVF in medial lemniscus on FA skeleton (left)	Brain WM
X25354.2.0	Mean ICVF in inferior cerebellar peduncle on FA skeleton (right)	Brain WM
X25355.2.0	Mean ICVF in inferior cerebellar peduncle on FA skeleton (left)	Brain WM
X25356.2.0	Mean ICVF in superior cerebellar peduncle on FA skeleton (right)	Brain WM
X25357.2.0	Mean ICVF in superior cerebellar peduncle on FA skeleton (left)	Brain WM
X25358.2.0	Mean ICVF in cerebral peduncle on FA skeleton (right)	Brain WM
X25359.2.0	Mean ICVF in cerebral peduncle on FA skeleton (left)	Brain WM
X25360.2.0	Mean ICVF in anterior limb of internal capsule on FA skeleton (right)	Brain WM
X25361.2.0	Mean ICVF in anterior limb of internal capsule on FA skeleton (left)	Brain WM
X25362.2.0	Mean ICVF in posterior limb of internal capsule on FA skeleton (right)	Brain WM
X25363.2.0	Mean ICVF in posterior limb of internal capsule on FA skeleton (left)	Brain WM
X25364.2.0	Mean ICVF in retrolenticular part of internal capsule on FA skeleton (right)	Brain WM
X25365.2.0	Mean ICVF in retrolenticular part of internal capsule on FA skeleton (left)	Brain WM
X25366.2.0	Mean ICVF in anterior corona radiata on FA skeleton (right)	Brain WM
X25367.2.0	Mean ICVF in anterior corona radiata on FA skeleton (left)	Brain WM
X25368.2.0	Mean ICVF in superior corona radiata on FA skeleton (right)	Brain WM
X25369.2.0	Mean ICVF in superior corona radiata on FA skeleton (left)	Brain WM
X25370.2.0	Mean ICVF in posterior corona radiata on FA skeleton (right)	Brain WM
X25371.2.0	Mean ICVF in posterior corona radiata on FA skeleton (left)	Brain WM
X25372.2.0	Mean ICVF in posterior thalamic radiation on FA skeleton (right)	Brain WM
X25373.2.0	Mean ICVF in posterior thalamic radiation on FA skeleton (left)	Brain WM
X25374.2.0	Mean ICVF in sagittal stratum on FA skeleton (right)	Brain WM
X25375.2.0	Mean ICVF in sagittal stratum on FA skeleton (left)	Brain WM
X25376.2.0	Mean ICVF in external capsule on FA skeleton (right)	Brain WM
X25377.2.0	Mean ICVF in external capsule on FA skeleton (left)	Brain WM
X25378.2.0	Mean ICVF in cingulum cingulate gyrus on FA skeleton (right)	Brain WM
X25379.2.0	Mean ICVF in cingulum cingulate gyrus on FA skeleton (left)	Brain WM
X25380.2.0	Mean ICVF in cingulum hippocampus on FA skeleton (right)	Brain WM
X25381.2.0	Mean ICVF in cingulum hippocampus on FA skeleton (left)	Brain WM
X25382.2.0	Mean ICVF in fornix cres+stria terminalis on FA skeleton (right)	Brain WM
X25383.2.0	Mean ICVF in fornix cres+stria terminalis on FA skeleton (left)	Brain WM
X25384.2.0	Mean ICVF in superior longitudinal fasciculus on FA skeleton (right)	Brain WM
X25385.2.0	Mean ICVF in superior longitudinal fasciculus on FA skeleton (left)	Brain WM
X25386.2.0	Mean ICVF in superior fronto-occipital fasciculus on FA skeleton (right)	Brain WM
X25387.2.0	Mean ICVF in superior fronto-occipital fasciculus on FA skeleton (left)	Brain WM
X25388.2.0	Mean ICVF in uncinate fasciculus on FA skeleton (right)	Brain WM
X25389.2.0	Mean ICVF in uncinate fasciculus on FA skeleton (left)	Brain WM
X25390.2.0	Mean ICVF in tapetum on FA skeleton (right)	Brain WM
X25391.2.0	Mean ICVF in tapetum on FA skeleton (left)	Brain WM
X25392.2.0	Mean OD in middle cerebellar peduncle on FA skeleton	Brain WM
X25393.2.0	Mean OD in pontine crossing tract on FA skeleton	Brain WM
X25394.2.0	Mean OD in genu of corpus callosum on FA skeleton	Brain WM
X25395.2.0	Mean OD in body of corpus callosum on FA skeleton	Brain WM
X25396.2.0	Mean OD in splenium of corpus callosum on FA skeleton	Brain WM
X25397.2.0	Mean OD in fornix on FA skeleton	Brain WM
X25398.2.0	Mean OD in corticospinal tract on FA skeleton (right)	Brain WM
X25399.2.0	Mean OD in corticospinal tract on FA skeleton (left)	Brain WM
X25400.2.0	Mean OD in medial lemniscus on FA skeleton (right)	Brain WM
X25401.2.0	Mean OD in medial lemniscus on FA skeleton (left)	Brain WM
X25402.2.0	Mean OD in inferior cerebellar peduncle on FA skeleton (right)	Brain WM
X25403.2.0	Mean OD in inferior cerebellar peduncle on FA skeleton (left)	Brain WM
X25404.2.0	Mean OD in superior cerebellar peduncle on FA skeleton (right)	Brain WM
X25405.2.0	Mean OD in superior cerebellar peduncle on FA skeleton (left)	Brain WM
X25406.2.0	Mean OD in cerebral peduncle on FA skeleton (right)	Brain WM
X25407.2.0	Mean OD in cerebral peduncle on FA skeleton (left)	Brain WM
X25408.2.0	Mean OD in anterior limb of internal capsule on FA skeleton (right)	Brain WM
X25409.2.0	Mean OD in anterior limb of internal capsule on FA skeleton (left)	Brain WM
X25410.2.0	Mean OD in posterior limb of internal capsule on FA skeleton (right)	Brain WM
X25411.2.0	Mean OD in posterior limb of internal capsule on FA skeleton (left)	Brain WM
X25412.2.0	Mean OD in retrolenticular part of internal capsule on FA skeleton (right)	Brain WM
X25413.2.0	Mean OD in retrolenticular part of internal capsule on FA skeleton (left)	Brain WM
X25414.2.0	Mean OD in anterior corona radiata on FA skeleton (right)	Brain WM
X25415.2.0	Mean OD in anterior corona radiata on FA skeleton (left)	Brain WM
X25416.2.0	Mean OD in superior corona radiata on FA skeleton (right)	Brain WM
X25417.2.0	Mean OD in superior corona radiata on FA skeleton (left)	Brain WM
X25418.2.0	Mean OD in posterior corona radiata on FA skeleton (right)	Brain WM
X25419.2.0	Mean OD in posterior corona radiata on FA skeleton (left)	Brain WM
X25420.2.0	Mean OD in posterior thalamic radiation on FA skeleton (right)	Brain WM
X25421.2.0	Mean OD in posterior thalamic radiation on FA skeleton (left)	Brain WM
X25422.2.0	Mean OD in sagittal stratum on FA skeleton (right)	Brain WM
X25423.2.0	Mean OD in sagittal stratum on FA skeleton (left)	Brain WM
X25424.2.0	Mean OD in external capsule on FA skeleton (right)	Brain WM
X25425.2.0	Mean OD in external capsule on FA skeleton (left)	Brain WM
X25426.2.0	Mean OD in cingulum cingulate gyrus on FA skeleton (right)	Brain WM
X25427.2.0	Mean OD in cingulum cingulate gyrus on FA skeleton (left)	Brain WM
X25428.2.0	Mean OD in cingulum hippocampus on FA skeleton (right)	Brain WM
X25429.2.0	Mean OD in cingulum hippocampus on FA skeleton (left)	Brain WM
X25430.2.0	Mean OD in fornix cres+stria terminalis on FA skeleton (right)	Brain WM
X25431.2.0	Mean OD in fornix cres+stria terminalis on FA skeleton (left)	Brain WM
X25432.2.0	Mean OD in superior longitudinal fasciculus on FA skeleton (right)	Brain WM
X25433.2.0	Mean OD in superior longitudinal fasciculus on FA skeleton (left)	Brain WM
X25434.2.0	Mean OD in superior fronto-occipital fasciculus on FA skeleton (right)	Brain WM
X25435.2.0	Mean OD in superior fronto-occipital fasciculus on FA skeleton (left)	Brain WM
X25436.2.0	Mean OD in uncinate fasciculus on FA skeleton (right)	Brain WM
X25437.2.0	Mean OD in uncinate fasciculus on FA skeleton (left)	Brain WM
X25438.2.0	Mean OD in tapetum on FA skeleton (right)	Brain WM
X25439.2.0	Mean OD in tapetum on FA skeleton (left)	Brain WM
X25440.2.0	Mean ISOVF in middle cerebellar peduncle on FA skeleton	Brain WM
X25441.2.0	Mean ISOVF in pontine crossing tract on FA skeleton	Brain WM
X25442.2.0	Mean ISOVF in genu of corpus callosum on FA skeleton	Brain WM
X25443.2.0	Mean ISOVF in body of corpus callosum on FA skeleton	Brain WM
X25444.2.0	Mean ISOVF in splenium of corpus callosum on FA skeleton	Brain WM
X25445.2.0	Mean ISOVF in fornix on FA skeleton	Brain WM
X25446.2.0	Mean ISOVF in corticospinal tract on FA skeleton (right)	Brain WM
X25447.2.0	Mean ISOVF in corticospinal tract on FA skeleton (left)	Brain WM
X25448.2.0	Mean ISOVF in medial lemniscus on FA skeleton (right)	Brain WM
X25449.2.0	Mean ISOVF in medial lemniscus on FA skeleton (left)	Brain WM
X25450.2.0	Mean ISOVF in inferior cerebellar peduncle on FA skeleton (right)	Brain WM
X25451.2.0	Mean ISOVF in inferior cerebellar peduncle on FA skeleton (left)	Brain WM
X25452.2.0	Mean ISOVF in superior cerebellar peduncle on FA skeleton (right)	Brain WM
X25453.2.0	Mean ISOVF in superior cerebellar peduncle on FA skeleton (left)	Brain WM
X25454.2.0	Mean ISOVF in cerebral peduncle on FA skeleton (right)	Brain WM
X25455.2.0	Mean ISOVF in cerebral peduncle on FA skeleton (left)	Brain WM
X25456.2.0	Mean ISOVF in anterior limb of internal capsule on FA skeleton (right)	Brain WM
X25457.2.0	Mean ISOVF in anterior limb of internal capsule on FA skeleton (left)	Brain WM
X25458.2.0	Mean ISOVF in posterior limb of internal capsule on FA skeleton (right)	Brain WM
X25459.2.0	Mean ISOVF in posterior limb of internal capsule on FA skeleton (left)	Brain WM
X25460.2.0	Mean ISOVF in retrolenticular part of internal capsule on FA skeleton (right)	Brain WM
X25461.2.0	Mean ISOVF in retrolenticular part of internal capsule on FA skeleton (left)	Brain WM
X25462.2.0	Mean ISOVF in anterior corona radiata on FA skeleton (right)	Brain WM
X25463.2.0	Mean ISOVF in anterior corona radiata on FA skeleton (left)	Brain WM
X25464.2.0	Mean ISOVF in superior corona radiata on FA skeleton (right)	Brain WM
X25465.2.0	Mean ISOVF in superior corona radiata on FA skeleton (left)	Brain WM
X25466.2.0	Mean ISOVF in posterior corona radiata on FA skeleton (right)	Brain WM
X25467.2.0	Mean ISOVF in posterior corona radiata on FA skeleton (left)	Brain WM
X25468.2.0	Mean ISOVF in posterior thalamic radiation on FA skeleton (right)	Brain WM
X25469.2.0	Mean ISOVF in posterior thalamic radiation on FA skeleton (left)	Brain WM
X25470.2.0	Mean ISOVF in sagittal stratum on FA skeleton (right)	Brain WM
X25471.2.0	Mean ISOVF in sagittal stratum on FA skeleton (left)	Brain WM
X25472.2.0	Mean ISOVF in external capsule on FA skeleton (right)	Brain WM
X25473.2.0	Mean ISOVF in external capsule on FA skeleton (left)	Brain WM
X25474.2.0	Mean ISOVF in cingulum cingulate gyrus on FA skeleton (right)	Brain WM
X25475.2.0	Mean ISOVF in cingulum cingulate gyrus on FA skeleton (left)	Brain WM
X25476.2.0	Mean ISOVF in cingulum hippocampus on FA skeleton (right)	Brain WM
X25477.2.0	Mean ISOVF in cingulum hippocampus on FA skeleton (left)	Brain WM
X25478.2.0	Mean ISOVF in fornix cres+stria terminalis on FA skeleton (right)	Brain WM
X25479.2.0	Mean ISOVF in fornix cres+stria terminalis on FA skeleton (left)	Brain WM
X25480.2.0	Mean ISOVF in superior longitudinal fasciculus on FA skeleton (right)	Brain WM
X25481.2.0	Mean ISOVF in superior longitudinal fasciculus on FA skeleton (left)	Brain WM
X25482.2.0	Mean ISOVF in superior fronto-occipital fasciculus on FA skeleton (right)	Brain WM
X25483.2.0	Mean ISOVF in superior fronto-occipital fasciculus on FA skeleton (left)	Brain WM
X25484.2.0	Mean ISOVF in uncinate fasciculus on FA skeleton (right)	Brain WM
X25485.2.0	Mean ISOVF in uncinate fasciculus on FA skeleton (left)	Brain WM
X25486.2.0	Mean ISOVF in tapetum on FA skeleton (right)	Brain WM
X25487.2.0	Mean ISOVF in tapetum on FA skeleton (left)	Brain WM
X26530.2.0	Volume of Optic-Chiasm (whole brain)	Brain WM
X26531.2.0	Volume of CC-Posterior (whole brain)	Brain WM
X26532.2.0	Volume of CC-Mid-Posterior (whole brain)	Brain WM
X26533.2.0	Volume of CC-Central (whole brain)	Brain WM
X26534.2.0	Volume of CC-Mid-Anterior (whole brain)	Brain WM
X26535.2.0	Volume of CC-Anterior (whole brain)	Brain WM
X26553.2.0	Volume of CerebralWhiteMatter (left hemisphere)	Brain WM
X26556.2.0	Volume of Cerebellum-White-Matter (left hemisphere)	Brain WM
X26584.2.0	Volume of CerebralWhiteMatter (right hemisphere)	Brain WM
X26587.2.0	Volume of Cerebellum-White-Matter (right hemisphere)	Brain WM
X22420.2.0	LV ejection fraction	Heart
X22421.2.0	LV end diastolic volume	Heart
X22422.2.0	LV end systolic volume	Heart
X22423.2.0	LV stroke volume	Heart
X22424.2.0	Cardiac output	Heart
X22425.2.0	Cardiac index	Heart
X22426.2.0	Average heart rate	Heart
X22427.2.0	Body surface area	Heart
X24100.2.0	LV end diastolic volume	Heart
X24101.2.0	LV end systolic volume	Heart
X24102.2.0	LV stroke volume	Heart
X24103.2.0	LV ejection fraction	Heart
X24104.2.0	LV cardiac output	Heart
X24105.2.0	LV myocardial mass	Heart
X24106.2.0	RV end diastolic volume	Heart
X24107.2.0	RV end systolic volume	Heart
X24108.2.0	RV stroke volume	Heart
X24109.2.0	RV ejection fraction	Heart
X24110.2.0	LA maximum volume	Heart
X24111.2.0	LA minimum volume	Heart
X24112.2.0	LA stroke volume	Heart
X24113.2.0	LA ejection fraction	Heart
X24114.2.0	RA maximum volume	Heart
X24115.2.0	RA minimum volume	Heart
X24116.2.0	RA stroke volume	Heart
X24117.2.0	RA ejection fraction	Heart
X24118.2.0	Ascending aorta maximum area	Heart
X24119.2.0	Ascending aorta minimum area	Heart
X24120.2.0	Ascending aorta distensibility	Heart
X24121.2.0	Descending aorta maximum area	Heart
X24122.2.0	Descending aorta minimum area	Heart
X24123.2.0	Descending aorta distensibility	Heart
X24124.2.0	LV mean myocardial wall thickness AHA 1	Heart
X24125.2.0	LV mean myocardial wall thickness AHA 2	Heart
X24126.2.0	LV mean myocardial wall thickness AHA 3	Heart
X24127.2.0	LV mean myocardial wall thickness AHA 4	Heart
X24128.2.0	LV mean myocardial wall thickness AHA 5	Heart
X24129.2.0	LV mean myocardial wall thickness AHA 6	Heart
X24130.2.0	LV mean myocardial wall thickness AHA 7	Heart
X24131.2.0	LV mean myocardial wall thickness AHA 8	Heart
X24132.2.0	LV mean myocardial wall thickness AHA 9	Heart
X24133.2.0	LV mean myocardial wall thickness AHA 10	Heart
X24134.2.0	LV mean myocardial wall thickness AHA 11	Heart
X24135.2.0	LV mean myocardial wall thickness AHA 12	Heart
X24136.2.0	LV mean myocardial wall thickness AHA 13	Heart
X24137.2.0	LV mean myocardial wall thickness AHA 14	Heart
X24138.2.0	LV mean myocardial wall thickness AHA 15	Heart
X24139.2.0	LV mean myocardial wall thickness AHA 16	Heart
X24140.2.0	LV mean myocardial wall thickness global	Heart
X24141.2.0	LV circumferential strain AHA 1	Heart
X24142.2.0	LV circumferential strain AHA 2	Heart
X24143.2.0	LV circumferential strain AHA 3	Heart
X24144.2.0	LV circumferential strain AHA 4	Heart
X24145.2.0	LV circumferential strain AHA 5	Heart
X24146.2.0	LV circumferential strain AHA 6	Heart
X24147.2.0	LV circumferential strain AHA 7	Heart
X24148.2.0	LV circumferential strain AHA 8	Heart
X24149.2.0	LV circumferential strain AHA 9	Heart
X24150.2.0	LV circumferential strain AHA 10	Heart
X24151.2.0	LV circumferential strain AHA 11	Heart
X24152.2.0	LV circumferential strain AHA 12	Heart
X24153.2.0	LV circumferential strain AHA 13	Heart
X24154.2.0	LV circumferential strain AHA 14	Heart
X24155.2.0	LV circumferential strain AHA 15	Heart
X24156.2.0	LV circumferential strain AHA 16	Heart
X24157.2.0	LV circumferential strain global	Heart
X24158.2.0	LV radial strain AHA 1	Heart
X24159.2.0	LV radial strain AHA 2	Heart
X24160.2.0	LV radial strain AHA 3	Heart
X24161.2.0	LV radial strain AHA 4	Heart
X24162.2.0	LV radial strain AHA 5	Heart
X24163.2.0	LV radial strain AHA 6	Heart
X24164.2.0	LV radial strain AHA 7	Heart
X24165.2.0	LV radial strain AHA 8	Heart
X24166.2.0	LV radial strain AHA 9	Heart
X24167.2.0	LV radial strain AHA 10	Heart
X24168.2.0	LV radial strain AHA 11	Heart
X24169.2.0	LV radial strain AHA 12	Heart
X24170.2.0	LV radial strain AHA 13	Heart
X24171.2.0	LV radial strain AHA 14	Heart
X24172.2.0	LV radial strain AHA 15	Heart
X24173.2.0	LV radial strain AHA 16	Heart
X24174.2.0	LV radial strain global	Heart
X24175.2.0	LV longitudinal strain Segment 1	Heart
X24176.2.0	LV longitudinal strain Segment 2	Heart
X24177.2.0	LV longitudinal strain Segment 3	Heart
X24178.2.0	LV longitudinal strain Segment 4	Heart
X24179.2.0	LV longitudinal strain Segment 5	Heart
X24180.2.0	LV longitudinal strain Segment 6	Heart
X24181.2.0	LV longitudinal strain global	Heart
X31067.2.0	Right ventricular end diastolic volume	Heart
X31068.2.0	Right ventricular ejection fraction	Heart
X31069.2.0	Right ventricular end systolic volume	Heart
X31070.2.0	Right ventricular stroke volume	Heart
X31077.2.0	Systole mean area of ascending aorta	Heart
X31078.2.0	Systole mean area of proximal descending aorta	Heart
X31079.2.0	Diastole mean area of ascending aorta	Heart
X31080.2.0	Diastole mean area of proximal descending aorta	Heart
X31081.2.0	Systole standard deviation of ascending aorta area	Heart
X31082.2.0	Systole standard deviation of proximal descending aorta area	Heart
X31083.2.0	Diastole standard deviation of ascending aorta mean	Heart
X31084.2.0	Diastole standard deviation of proximal descending aorta mean	Heart
X31085.2.0	Mean estimate of area of pericardial fat	Heart
X31087.2.0	Standard deviation of area of pericardial fat	Heart
X31126.2.0	Analysable ascending aorta	Heart
X31127.2.0	Analysable proximal descending aorta	Heart
X20300.2.0	Hip shape mode score 1	Body composition
X20301.2.0	Hip shape mode score 2	Body composition
X20302.2.0	Hip shape mode score 3	Body composition
X20303.2.0	Hip shape mode score 4	Body composition
X20304.2.0	Hip shape mode score 5	Body composition
X20305.2.0	Hip shape mode score 6	Body composition
X20306.2.0	Hip shape mode score 7	Body composition
X20307.2.0	Hip shape mode score 8	Body composition
X20308.2.0	Hip shape mode score 9	Body composition
X20309.2.0	Hip shape mode score 10	Body composition
X20310.2.0	Alpha angle	Body composition
X20311.2.0	Lateral centre-edge angle	Body composition
X20312.2.0	Minimum joint space width (mJSW)	Body composition
X20313.2.0	Index mJSW	Body composition
X20315.2.0	Grading of any osteophyte at any site	Body composition
X20316.2.0	Grading of an acetabular osteophyte	Body composition
X20317.2.0	Grading of a superior femoral osteophyte	Body composition
X20318.2.0	Grading of an inferior femoral osteophyte	Body composition
X20319.2.0	Grading of osteophytes at all three site	Body composition
X20320.2.0	Osteophyte grading at any site	Body composition
X20321.2.0	Radiographic osteoarthritis grading	Body composition
X21005.2.0	L1-L4 TBS (trabecular bone score)	Body composition
X21086.2.0	Subcutaneous fat volume	Body composition
X21110.2.0	Android fat free mass	Body composition
X21119.2.0	Arms bone mass	Body composition
X21120.2.0	Arms fat free mass	Body composition
X21122.2.0	Total bone mass	Body composition
X21123.2.0	Gynoid fat free mass	Body composition
X21131.2.0	Legs bone mass	Body composition
X21132.2.0	Legs fat free mass	Body composition
X21134.2.0	Trunk bone mass	Body composition
X22403.2.0	Anterior thigh fat-free muscle volume (right)	Body composition
X22404.2.0	Posterior thigh fat-free muscle volume (right)	Body composition
X22405.2.0	Anterior thigh fat-free muscle volume (left)	Body composition
X22406.2.0	Posterior thigh fat-free muscle volume (left)	Body composition
X22407.2.0	Visceral adipose tissue volume (VAT)	Body composition
X22408.2.0	Abdominal subcutaneous adipose tissue volume (ASAT)	Body composition
X22409.2.0	Total thigh fat-free muscle volume	Body composition
X22410.2.0	Total trunk fat volume	Body composition
X22432.2.0	Total abdominal adipose tissue index	Body composition
X22433.2.0	Weight-to-muscle ratio	Body composition
X22434.2.0	Abdominal fat ratio	Body composition
X22435.2.0	Muscle fat infiltration	Body composition
X23200.2.0	L1-L4 area	Body composition
X23201.2.0	L1-L4 average height	Body composition
X23202.2.0	L1-L4 average width	Body composition
X23203.2.0	L1-L4 BMC (bone mineral content)	Body composition
X23204.2.0	L1-L4 BMD (bone mineral density)	Body composition
X23205.2.0	L1-L4 BMD (bone mineral density) T-score	Body composition
X23208.2.0	Femur neck BMD (bone mineral density) (right)	Body composition
X23209.2.0	Femur neck BMD (bone mineral density) T-score (right)	Body composition
X23210.2.0	Femur shaft BMD (bone mineral density) (right)	Body composition
X23212.2.0	Femur total BMD (bone mineral density) (right)	Body composition
X23213.2.0	Femur total BMD (bone mineral density) T-score (right)	Body composition
X23214.2.0	Femur troch BMD (bone mineral density) (right)	Body composition
X23215.2.0	Femur troch BMD (bone mineral density) T-score (right)	Body composition
X23218.2.0	Femur wards BMD (bone mineral density) (right)	Body composition
X23219.2.0	Femur wards BMD (bone mineral density) T-score (right)	Body composition
X23224.2.0	Arms BMC (bone mineral content)	Body composition
X23225.2.0	Arms BMD (bone mineral density)	Body composition
X23226.2.0	Head BMD (bone mineral density)	Body composition
X23230.2.0	Legs BMC (bone mineral content)	Body composition
X23231.2.0	Legs BMD (bone mineral density)	Body composition
X23232.2.0	Pelvis BMD (bone mineral density)	Body composition
X23233.2.0	Ribs BMD (bone mineral density)	Body composition
X23234.2.0	Spine BMD (bone mineral density)	Body composition
X23235.2.0	Total BMC (bone mineral content)	Body composition
X23236.2.0	Total BMD (bone mineral density)	Body composition
X23239.2.0	Total BMD (bone mineral density) T-score	Body composition
X23240.2.0	Trunk BMC (bone mineral content)	Body composition
X23241.2.0	Trunk BMD (bone mineral density)	Body composition
X23244.2.0	Android bone mass	Body composition
X23245.2.0	Android fat mass	Body composition
X23246.2.0	Android lean mass	Body composition
X23247.2.0	Android tissue fat percentage	Body composition
X23257.2.0	Arms fat mass	Body composition
X23258.2.0	Arms lean mass	Body composition
X23259.2.0	Arms tissue fat percentage	Body composition
X23261.2.0	Gynoid bone mass	Body composition
X23262.2.0	Gynoid fat mass	Body composition
X23263.2.0	Gynoid lean mass	Body composition
X23264.2.0	Gynoid tissue fat percentage	Body composition
X23274.2.0	Legs fat mass	Body composition
X23275.2.0	Legs lean mass	Body composition
X23276.2.0	Legs tissue fat percentage	Body composition
X23278.2.0	Total fat mass	Body composition
X23279.2.0	Total fat-free mass	Body composition
X23280.2.0	Total lean mass	Body composition
X23281.2.0	Total tissue fat percentage	Body composition
X23284.2.0	Trunk fat mass	Body composition
X23285.2.0	Trunk lean mass	Body composition
X23286.2.0	Trunk tissue fat percentage	Body composition
X23288.2.0	VAT (visceral adipose tissue) mass	Body composition
X23289.2.0	VAT (visceral adipose tissue) volume	Body composition
X23290.2.0	Femur shaft BMD (bone mineral density) (left)	Body composition
X23291.2.0	Femur total BMD (bone mineral density) (left)	Body composition
X23293.2.0	Femur total BMD (bone mineral density) T-score (left)	Body composition
X23295.2.0	Femur troch BMD (bone mineral density) (left)	Body composition
X23297.2.0	Femur wards BMD (bone mineral density) (left)	Body composition
X23298.2.0	Femur troch BMD (bone mineral density) T-score (left)	Body composition
X23299.2.0	Femur neck BMD (bone mineral density) (left)	Body composition
X23300.2.0	Femur neck BMD (bone mineral density) T-score (left)	Body composition
X23301.2.0	Femur wards BMD (bone mineral density) T-score (left)	Body composition
X23304.2.0	Trunk bone area	Body composition
X23305.2.0	Head bone area	Body composition
X23306.2.0	Head BMC (bone mineral content)	Body composition
X23307.2.0	Pelvis bone area	Body composition
X23308.2.0	Pelvis BMC (bone mineral content)	Body composition
X23309.2.0	Ribs bone area	Body composition
X23310.2.0	Ribs BMC (bone mineral content)	Body composition
X23311.2.0	Spine bone area	Body composition
X23312.2.0	Spine BMC (bone mineral content)	Body composition
X23317.2.0	Arms combined bone area	Body composition
X23318.2.0	Legs combined bone area	Body composition
X23325.2.0	Femur neck bone area (left)	Body composition
X23326.2.0	Femur neck bone area (right)	Body composition
X23327.2.0	Femur neck BMC (bone mineral content) (left)	Body composition
X23328.2.0	Femur neck BMC (bone mineral content) (right)	Body composition
X23329.2.0	Femur shaft bone area (left)	Body composition
X23330.2.0	Femur shaft bone area (right)	Body composition
X23331.2.0	Femur shaft BMC (bone mineral content) (left)	Body composition
X23332.2.0	Femur shaft BMC (bone mineral content) (right)	Body composition
X23333.2.0	Femur total area (left)	Body composition
X23334.2.0	Femur total area (right)	Body composition
X23335.2.0	Femur total BMC (bone mineral content) (left)	Body composition
X23336.2.0	Femur total BMC (bone mineral content) (right)	Body composition
X23337.2.0	Femur troch bone area (left)	Body composition
X23338.2.0	Femur troch bone area (right)	Body composition
X23339.2.0	Femur troch BMC (bone mineral content) (left)	Body composition
X23340.2.0	Femur troch BMC (bone mineral content) (right)	Body composition
X23341.2.0	Femur wards bone area (left)	Body composition
X23342.2.0	Femur wards bone area (right)	Body composition
X23343.2.0	Femur wards BMC (bone mineral content) (left)	Body composition
X23344.2.0	Femur wards BMC (bone mineral content) (right)	Body composition
X23355.2.0	Posterior thigh muscle fat infiltration (MFI) (left)	Body composition
X23356.2.0	Posterior thigh muscle fat infiltration (MFI) (right)	Body composition
X24353.2.0	Anterior thigh muscle fat infiltration (MFI) (left)	Body composition
X24354.2.0	Anterior thigh muscle fat infiltration (MFI) (right)	Body composition
X21081.2.0	Left kidney volume	Kidney
X21082.2.0	Right kidney volume	Kidney
X21160.2.0	Kidney parenchyma total	Kidney
X21161.2.0	Kidney parenchyma (left)	Kidney
X21162.2.0	Kidney parenchyma (right)	Kidney
X21163.2.0	Kidney distance	Kidney
X21080.2.0	Liver volume	Liver
X21088.2.0	Liver PDFF (fat fraction)	Liver
X21089.2.0	Liver iron	Liver
X24352.2.0	FR liver PDFF mean	Liver
X40060.2.0	Liver iron (Fe)	Liver
X40061.2.0	Proton density fat fraction (PDFF)	Liver
X40062.2.0	Liver iron corrected T1 (ct1)	Liver
X21087.2.0	Pancreas volume	Pancreas
X21090.2.0	Pancreas PDFF (fat fraction)	Pancreas
X21091.2.0	Pancreas iron	Pancreas
X27800.0.0	Overall macular thickness (left)	Eye
X27801.0.0	Overall macular thickness (right)	Eye
X27802.0.0	Macular thickness at the central subfield (left)	Eye
X27803.0.0	Macular thickness at the central subfield (right)	Eye
X27804.0.0	Macular thickness at the inner inferior subfield (left)	Eye
X27805.0.0	Macular thickness at the inner inferior subfield (right)	Eye
X27806.0.0	Macular thickness at the inner nasal subfield (left)	Eye
X27807.0.0	Macular thickness at the inner nasal subfield (right)	Eye
X27808.0.0	Macular thickness at the inner superior subfield (left)	Eye
X27809.0.0	Macular thickness at the inner superior subfield (right)	Eye
X27810.0.0	Macular thickness at the inner temporal subfield (left)	Eye
X27811.0.0	Macular thickness at the inner temporal subfield (right)	Eye
X27812.0.0	Macular thickness at the outer inferior subfield (left)	Eye
X27813.0.0	Macular thickness at the outer inferior subfield (right)	Eye
X27814.0.0	Macular thickness at the outer nasal subfield (left)	Eye
X27815.0.0	Macular thickness at the outer nasal subfield (right)	Eye
X27816.0.0	Macular thickness at the outer superior subfield (left)	Eye
X27817.0.0	Macular thickness at the outer superior subfield (right)	Eye
X27818.0.0	Macular thickness at the outer temporal subfield (left)	Eye
X27819.0.0	Macular thickness at the outer temporal subfield (right)	Eye
X27822.0.0	Overall average retinal pigment epithelium thickness (left)	Eye
X27823.0.0	Overall average retinal pigment epithelium thickness (right)	Eye
X27851.0.0	Disc diameter after inverse rank normal transformation (left)	Eye
X27853.0.0	Mean of vertical disc diameter (left)	Eye
X27855.0.0	Vertical cup to disc ratio (VCDR) regressed and transformed (left)	Eye
X27857.0.0	Vertical cup to disc ratio (VCDR) (left)	Eye
X28500.0.0	Average retinal nerve fibre layer thickness (left)	Eye
X28501.0.0	Average retinal nerve fibre layer thickness (right)	Eye
X28502.0.0	Average inner nuclear layer thickness (left)	Eye
X28503.0.0	Average inner nuclear layer thickness (right)	Eye
X28504.0.0	Average ganglion cell-inner plexiform layer thickness (left)	Eye
X28505.0.0	Average ganglion cell-inner plexiform layer thickness (right)	Eye
X28506.0.0	INL-ELM thickness of the central subfield (left)	Eye
X28507.0.0	INL-ELM thickness of the central subfield (right)	Eye
X28508.0.0	INL-ELM thickness of the inner subfield (left)	Eye
X28509.0.0	INL-ELM thickness of the inner subfield (right)	Eye
X28510.0.0	INL-ELM thickness of the outer subfield (left)	Eye
X28511.0.0	INL-ELM thickness of the outer subfield (right)	Eye
X28512.0.0	Average INL-ELM thickness (left)	Eye
X28513.0.0	Average INL-ELM thickness (right)	Eye
X28514.0.0	ELM-ISOS thickness of central subfield (left)	Eye
X28515.0.0	ELM-ISOS thickness of central subfield (right)	Eye
X28516.0.0	ELM-ISOS thickness of inner subfield (left)	Eye
X28517.0.0	ELM-ISOS thickness of inner subfield (right)	Eye
X28518.0.0	ELM-ISOS thickness of outer subfield (left)	Eye
X28519.0.0	ELM-ISOS thickness of outer subfield (right)	Eye
X28520.0.0	Average ELM-ISOS thickness (left)	Eye
X28521.0.0	Average ELM-ISOS thickness (right)	Eye
X28522.0.0	ISOS-RPE thickness of central subfield (left)	Eye
X28523.0.0	ISOS-RPE thickness of central subfield (right)	Eye
X28524.0.0	ISOS-RPE thickness of inner subfield (left)	Eye
X28525.0.0	ISOS-RPE thickness of inner subfield (right)	Eye
X28526.0.0	ISOS-RPE thickness of outer subfield (left)	Eye
X28527.0.0	ISOS-RPE thickness of outer subfield (right)	Eye
X28528.0.0	Average ISOS-RPE thickness (left)	Eye
X28529.0.0	Average ISOS-RPE thickness (right)	Eye
X28530.0.0	INL-RPE thickness of central subfield (left)	Eye
X28531.0.0	INL-RPE thickness of central subfield (right)	Eye
X28532.0.0	INL-RPE thickness of inner subfield (left)	Eye
X28533.0.0	INL-RPE thickness of inner subfield (right)	Eye
X28534.0.0	INL-RPE thickness of outer subfield (left)	Eye
X28535.0.0	INL-RPE thickness of outer subfield (right)	Eye
X28536.0.0	Average INL-RPE thickness (left)	Eye
X28537.0.0	Average INL-RPE thickness (right)	Eye

## Sheet: Table2-Demography_ageModel
The demography of the healthy participants used for organ age modeling
	Brain GM	Brain WM	Heart	Body composition	Kidney	Liver	Pancreas	Eye
N	5190	4943	N=2818	N=1739	N=4379	N=3361	N=3595	N=5397
Age	63.8 (7.61)	63.8 (7.61)	62.9 (7.42)	63.3 (7.39)	63.5 (7.46)	63.8 (7.41)	63.7 (7.46)	56.5 (8.01)
Sex
Female	2673 (51.5%)	2562 (51.8%)	1415 (50.2%)	860 (49.5%)	2238 (51.1%)	1729 (51.4%)	1797 (50.0%)	2880 (53.4%)
Male	2517 (48.5%)	2381 (48.2%)	1403 (49.8%)	879 (50.5%)	2141 (48.9%)	1632 (48.6%)	1798 (50.0%)	2517 (46.6%)
eTIV (mm3)	1550589 (161619)	1550178 (162057)	-
Imaging site
11014	0 (0.00%)	0 (0.00%)	0 (0.00%)	0 (0.00%)	0 (0.00%)	0 (0.00%)	0 (0.00%)	1489 (27.6%)
11016	0 (0.00%)	0 (0.00%)	0 (0.00%)	0 (0.00%)	0 (0.00%)	0 (0.00%)	0 (0.00%)	432 (8.00%)
11018	0 (0.00%)	0 (0.00%)	0 (0.00%)	0 (0.00%)	0 (0.00%)	0 (0.00%)	0 (0.00%)	927 (17.2%)
11020	0 (0.00%)	0 (0.00%)	0 (0.00%)	0 (0.00%)	0 (0.00%)	0 (0.00%)	0 (0.00%)	1214 (22.5%)
11021	0 (0.00%)	0 (0.00%)	0 (0.00%)	0 (0.00%)	0 (0.00%)	0 (0.00%)	0 (0.00%)	1335 (24.7%)
11025	3094 (59.6%)	2871 (58.1%)	2047 (72.6%)	1577 (90.7%)	2715 (62.0%)	1771 (52.7%)	2089 (58.1%)	0 (0.00%)
11026	783 (15.1%)	779 (15.8%)	176 (6.25%)	162 (9.32%)	527 (12.0%)	523 (15.6%)	495 (13.8%)	0 (0.00%)
11027	1313 (25.3%)	1293 (26.2%)	595 (21.1%)	0 (0.00%)	1137 (26.0%)	1067 (31.7%)	1011 (28.1%)	0 (0.00%)

## Sheet: Table3-Incident_outcomes
The selected incident outcomes from UKB
Disease	ICD 10	Disease code
Diseases of Infections	A01-B89	A0
Bacterial infections	A01-A79	A1
Viral infections	A80-B34	A2
Cancer	C00-C97	C0
Colorectal cancer	C18-C20	C1
Lung cancer	C34	C2
Melanoma	C43-C44	C3
Breast cancer	C50	C4
Prostate cancer	C61	C5
Leukaemia	C81-C96	C6
Blood and immune disorders	D50-D89	D0
Anemia	D50-D64	D1
Endocrine disorders	E00-E90	E0
Diabetes	E10-E14	E1
Obesity	E66	E2
Mental and behavioural disorders	F00-F99	F0
Dementia	F00-F03, G30, G31	F1
Substance abuse	F10-F19	F2
Pyschotic disorders	F20-F29	F3
Mood disorders	F30-F39	F4
Neurotic disorders	F40-F48	F5
Nervous system disorders	G00-G99	G0
Parkinson disease	G20-G22	G1
Epilepsy	G40-G42	G2
Transient ischemic attack	G45-G46	G3
Sleep disorders	G47	G4
Eye disorders	H00-H59	H0
Cataracts	H25-H26	H1
Glaucoma	H40	H2
Ear disorders	H60-H99	H3
Circulatory system disorders	I00-I99	I0
Hypertension	I10-I15	I1
Ischemic heart diseases	I20-I25	I2
Arrhythmias	I46-I49	I3
Heart failure	I50	I4
Stroke	I60-I61, I63-I64	I5
Cerebrovascular diseases	I60-I69	I6
Peripheral artery diseases	I70-I79	I7
Respiratory system disorders	J00-J99	J0
Influenza and Pneumonia	J09-J18	J1
Chronic obstructive pulmonary disease	J40-J44, J47	J2
Asthma	J45-J46	J3
Digestive system disorders	K00-K93	K0
Inflammatory bowel disease	K50-K52	K1
Liver diseases	K70-K77	K2
Pancreatitis	K85	K3
Skin disorders	L00-L99	L0
Infections and excema	L00-L08, L20-L30	L1
Musculoskeletal system disorders	M00-M99	M0
Rheumatoid arthritis disorders	M05-M06, M08, M13, M30-35, M45	M1
Osteoarthritis	M15-M19	M2
Sciatica	M50-M51	M3
Soft tissue disorders	M60-M79	M4
Genitourinary system disorders	N00-N99	N0
Renal failure	N17-N19	N1
All-cause mortality		X0
Cancer	C00-C97, D00-4D48	X1
Nervous system	G00-G99	X2
Circulatory system	I00-I99	X3
Respiratory system	J00-J99	X4

## Sheet: Table4-Demography_proteome
									The demography of participants eligible for the association analysis between organ-specific age gap and concentration of plasma proteins
										Brain GM	Brain WM	Heart	Kidney	Body composition	Liver	Eye	Pancreas
										N=5525	N=5219	N=2878	N=4417	N=1673	N=3392	N=530	N=3608
									Age	63.1 (7.95)	63.1 (7.89)	62.1 (7.72)	62.6 (7.78)	62.7 (7.71)	63.1 (7.70)	54.1 (7.43)	63.1 (7.70)
									Sex:
									Female	2940 (53.2%)	2792 (53.5%)	1530 (53.2%)	2361 (53.5%)	863 (51.6%)	1832 (54.0%)	295 (55.7%)	1881 (52.1%)
									Male	2585 (46.8%)	2427 (46.5%)	1348 (46.8%)	2056 (46.5%)	810 (48.4%)	1560 (46.0%)	235 (44.3%)	1727 (47.9%)
									eTIV	1549684 (152868)	1549023 (153243)	1553010 (152130)	1548385 (151426)	1555575 (151475)	1551147 (151777)	1560269 (151135)	1553735 (152165)
									Height	170 (9.17)	169 (9.17)	170 (9.11)	169 (9.13)	170 (8.94)	170 (9.12)	169 (8.78)	170 (9.16)
									Site:
									Sheffield	0 (0.00%)	0 (0.00%)	0 (0.00%)	0 (0.00%)	0 (0.00%)	0 (0.00%)	204 (38.5%)	0 (0.00%)
									Liverpool	0 (0.00%)	0 (0.00%)	0 (0.00%)	0 (0.00%)	0 (0.00%)	0 (0.00%)	57 (10.8%)	0 (0.00%)
									Hounslow	0 (0.00%)	0 (0.00%)	0 (0.00%)	0 (0.00%)	0 (0.00%)	0 (0.00%)	75 (14.2%)	0 (0.00%)
									Croydon	0 (0.00%)	0 (0.00%)	0 (0.00%)	0 (0.00%)	0 (0.00%)	0 (0.00%)	66 (12.5%)	0 (0.00%)
									Birmingham	0 (0.00%)	0 (0.00%)	0 (0.00%)	0 (0.00%)	0 (0.00%)	0 (0.00%)	128 (24.2%)	0 (0.00%)
									Cheadle	3240 (58.6%)	2973 (57.0%)	2112 (73.4%)	2732 (61.9%)	1519 (90.8%)	1674 (49.4%)	0 (0.00%)	2004 (55.5%)
									Reading	874 (15.8%)	873 (16.7%)	174 (6.05%)	536 (12.1%)	154 (9.21%)	592 (17.5%)	0 (0.00%)	542 (15.0%)
									Newcastle	1411 (25.5%)	1373 (26.3%)	592 (20.6%)	1149 (26.0%)	0 (0.00%)	1126 (33.2%)	0 (0.00%)	1062 (29.4%)
									Education	17.4 (4.00)	17.4 (3.98)	17.4 (3.95)	17.3 (3.99)	17.3 (4.00)	17.4 (3.96)	17.4 (3.87)	17.4 (3.97)
									Townsend index	-1.74 (2.83)	-1.75 (2.83)	-1.96 (2.70)	-1.85 (2.77)	-2.03 (2.64)	-1.80 (2.81)	-1.69 (2.71)	-1.85 (2.77)
									Smoking
									Never	3405 (61.6%)	3233 (61.9%)	1797 (62.4%)	2740 (62.0%)	1068 (63.8%)	2123 (62.6%)	323 (60.27%)	2253 (62.4%)
									Previous	1916 (34.7%)	1794 (34.4%)	964 (33.5%)	1511 (34.2%)	542 (32.4%)	1144 (33.7%)	183 (34.5%)	1222 (33.9%)
									Current	204 (3.69%)	192 (3.68%)	117 (4.07%)	166 (3.76%)	63 (3.77%)	125 (3.69%)	24 (4.53%)	133 (3.69%)
									Drinking
									Never	173 (3.13%)	164 (3.14%)	66 (2.29%)	130 (2.94%)	49 (2.93%)	98 (2.89%)	8 (1.51%)	105 (2.91%)
									Previous	168 (3.04%)	154 (2.95%)	86 (2.99%)	134 (3.03%)	48 (2.87%)	113 (3.33%)	14 (2.64%)	118 (3.27%)
									Current	5184 (93.8%)	4901 (93.9%)	2726 (94.7%)	4153 (94.0%)	1576 (94.2%)	3181 (93.8%)	508 (95.8%)	3385 (93.8%)
									Ethnicity
									White	5354 (96.9%)	5061 (97.0%)	2866 (99.6%)	4295 (97.2%)	1624 (97.1%)	3289 (97.0%)	527 (99.4%)	3506 (97.2%)
									Mixed	36 (0.65%)	33 (0.63%)	1 (0.03%)	24 (0.54%)	11 (0.66%)	20 (0.59%)	1 (0.19%)	21 (0.58%)
									Asian or Asian British	46 (0.83%)	41 (0.79%)	2 (0.07%)	33 (0.75%)	15 (0.90%)	30 (0.88%)	0 (0.00%)	31 (0.86%)
									Black or Black British	41 (0.74%)	39 (0.75%)	5 (0.17%)	30 (0.68%)	12 (0.72%)	23 (0.68%)	0 (0.00%)	23 (0.64%)
									Chinese	11 (0.20%)	11 (0.21%)	1 (0.03%)	8 (0.18%)	4 (0.24%)	10 (0.29%)	0 (0.00%)	8 (0.22%)
									Other ethnic group	37 (0.67%)	34 (0.65%)	3 (0.10%)	27 (0.61%)	7 (0.42%)	20 (0.59%)	2 (0.38%)	19 (0.53%)

## Sheet: Table5-Demography_bloodmarker
The demography of participants eligible for the association analysis between organ-specific age gap and blood biomarkers
	Brain GM	Brain WM	Heart	Kidney	Body composition	Liver	Eye	Pancreas
	N=25241	N=23617	N=14112	N=20218	N=8975	N=14420	N=2569	N=15892
Age	63.7 (7.66)	63.8 (7.64)	62.9 (7.45)	63.3 (7.52)	63.3 (7.48)	63.8 (7.46)	55.6 (7.56)	63.7 (7.46)
Sex
Female	13360 (52.9%)	12560 (53.2%)	7459 (52.9%)	10749 (53.2%)	4693 (52.3%)	7710 (53.5%)	1359 (52.9%)	8299 (52.2%)
Male	11881 (47.1%)	11057 (46.8%)	6653 (47.1%)	9469 (46.8%)	4282 (47.7%)	6710 (46.5%)	1210 (47.1%)	7593 (47.8%)
eTIV	1547899 (151220)	1547377 (151035)	1549542 (151618)	1546191 (150361)	1549583 (152641)	1549003 (151650)	1553936 (150260)	1549472 (151999)
Height	169 (9.13)	169 (9.11)	170 (9.08)	169 (9.11)	169 (9.05)	170 (9.16)	170 (8.87)	170 (9.17)
Site
Sheffield	0 (0.00%)	0 (0.00%)	0 (0.00%)	0 (0.00%)	0 (0.00%)	0 (0.00%)	1166 (45.4%)	0 (0.00%)
Liverpool	0 (0.00%)	0 (0.00%)	0 (0.00%)	0 (0.00%)	0 (0.00%)	0 (0.00%)	497 (19.3%)	0 (0.00%)
Hounslow	0 (0.00%)	0 (0.00%)	0 (0.00%)	0 (0.00%)	0 (0.00%)	0 (0.00%)	259 (10.1%)	0 (0.00%)
Croydon	0 (0.00%)	0 (0.00%)	0 (0.00%)	0 (0.00%)	0 (0.00%)	0 (0.00%)	213 (8.29%)	0 (0.00%)
Birmingham	0 (0.00%)	0 (0.00%)	0 (0.00%)	0 (0.00%)	0 (0.00%)	0 (0.00%)	434 (16.9%)	0 (0.00%)
Cheadle	17784 (70.5%)	16277 (68.9%)	11394 (80.7%)	14803 (73.2%)	8429 (93.9%)	9204 (63.8%)	0 (0.00%)	10953 (68.9%)
Reading	2704 (10.7%)	2691 (11.4%)	600 (4.25%)	1586 (7.84%)	546 (6.08%)	1582 (11.0%)	0 (0.00%)	1500 (9.44%)
Newcastle	4753 (18.8%)	4649 (19.7%)	2118 (15.0%)	3829 (18.9%)	0 (0.00%)	3634 (25.2%)	0 (0.00%)	3439 (21.6%)
Education	17.2 (4.11)	17.2 (4.11)	17.2 (4.07)	17.2 (4.09)	17.3 (4.05)	17.3 (4.02)	17.1 (4.09)	17.3 (4.05)
Townsend index	-1.96 (2.70)	-1.97 (2.69)	-2.09 (2.61)	-2.02 (2.65)	-2.16 (2.56)	-2.02 (2.67)	-1.99 (2.58)	-2.04 (2.64)
Smoking
Never	15788 (62.5%)	14838 (62.8%)	8881 (62.9%)	12703 (62.8%)	5671 (63.2%)	9184 (63.7%)	1566 (60.27%)	10093 (63.5%)
Previous	8577 (34.0%)	7981 (33.8%)	4728 (33.5%)	6817 (33.7%)	2978 (33.2%)	4767 (33.1%)	851 (33.1%)	5283 (33.2%)
Current	876 (3.47%)	798 (3.38%)	503 (3.56%)	698 (3.45%)	326 (3.63%)	469 (3.25%)	152 (5.92%)	516 (3.25%)
Drinking
Never	813 (3.22%)	757 (3.21%)	391 (2.77%)	655 (3.24%)	299 (3.33%)	479 (3.32%)	57 (2.22%)	519 (3.27%)
Previous	814 (3.22%)	751 (3.18%)	430 (3.05%)	621 (3.07%)	271 (3.02%)	454 (3.15%)	53 (2.06%)	500 (3.15%)
Current	23614 (93.6%)	22109 (93.6%)	13291 (94.2%)	18942 (93.7%)	8405 (93.6%)	13487 (93.5%)	2459 (95.7%)	14873 (93.6%)
Ethnicity
White	24509 (97.1%)	22946 (97.2%)	14025 (99.4%)	19659 (97.2%)	8710 (97.0%)	14016 (97.2%)	2565 (99.8%)	15459 (97.3%)
Mixed	110 (0.44%)	107 (0.45%)	12 (0.09%)	85 (0.42%)	36 (0.40%)	65 (0.45%)	2 (0.08%)	71 (0.45%)
Asian or Asian British	251 (0.99%)	227 (0.96%)	34 (0.24%)	196 (0.97%)	95 (1.06%)	132 (0.92%)	0 (0.00%)	150 (0.94%)
Black or Black British	144 (0.57%)	127 (0.54%)	12 (0.09%)	99 (0.49%)	44 (0.49%)	72 (0.50%)	0 (0.00%)	75 (0.47%)
Chinese	80 (0.32%)	72 (0.30%)	8 (0.06%)	69 (0.34%)	42 (0.47%)	51 (0.35%)	0 (0.00%)	55 (0.35%)
Other ethnic group	147 (0.58%)	138 (0.58%)	21 (0.15%)	110 (0.54%)	48 (0.53%)	84 (0.58%)	2 (0.08%)	82 (0.52%)

## Sheet: Table6-Bloodmarker_categories
The definition of categories of blood biomarkers, including blood biochemistry, blood count and metabolic biomarkers. The category of duplicated biomarkers from different instrument was set to that for metablic biomarkers
Name	Category
Acetate	Ketone bodies
Acetoacetate	Ketone bodies
Acetone	Ketone bodies
Alanine	Amino acids
Albumin	Fluid balance
Apolipoprotein A1	Apolipoproteins
Apolipoprotein B	Apolipoproteins
Apolipoprotein B to Apolipoprotein A1 ratio	Apolipoproteins
3-Hydroxybutyrate	Ketone bodies
Total Cholines	Lipoprotein and lipid
Citrate	Glycolysis related metabolites
Clinical LDL Cholesterol	Cholesterol
Creatinine	Fluid balance
Docosahexaenoic Acid	Fatty acids
Docosahexaenoic Acid to Total Fatty Acids percentage	Fatty acids
Glutamine	Amino acids
Glucose	Glycolysis related metabolites
Glycine	Amino acids
Glycoprotein Acetyls	Inflammation
HDL Cholesterol	Cholesterol
Cholesteryl Esters in HDL	Cholesterol
Free Cholesterol in HDL	Cholesterol
Total Lipids in HDL	Lipoprotein and lipid
Concentration of HDL Particles	Lipoprotein and lipid
Phospholipids in HDL	Lipoprotein and lipid
Average Diameter for HDL Particles	Lipoprotein and lipid
Triglycerides in HDL	Lipoprotein and lipid
Histidine	Amino acids
Cholesterol in IDL	Lipoprotein and lipid
Cholesterol to Total Lipids in IDL percentage	Lipoprotein and lipid
Cholesteryl Esters in IDL	Lipoprotein and lipid
Cholesteryl Esters to Total Lipids in IDL percentage	Lipoprotein and lipid
Free Cholesterol in IDL	Lipoprotein and lipid
Free Cholesterol to Total Lipids in IDL percentage	Lipoprotein and lipid
Total Lipids in IDL	Lipoprotein and lipid
Concentration of IDL Particles	Lipoprotein and lipid
Phospholipids in IDL	Lipoprotein and lipid
Phospholipids to Total Lipids in IDL percentage	Lipoprotein and lipid
Triglycerides in IDL	Lipoprotein and lipid
Triglycerides to Total Lipids in IDL percentage	Lipoprotein and lipid
Isoleucine	Amino acids
Cholesterol in Large HDL	Lipoprotein and lipid
Cholesterol to Total Lipids in Large HDL percentage	Lipoprotein and lipid
Cholesteryl Esters in Large HDL	Lipoprotein and lipid
Cholesteryl Esters to Total Lipids in Large HDL percentage	Lipoprotein and lipid
Free Cholesterol in Large HDL	Lipoprotein and lipid
Free Cholesterol to Total Lipids in Large HDL percentage	Lipoprotein and lipid
Total Lipids in Large HDL	Lipoprotein and lipid
Concentration of Large HDL Particles	Lipoprotein and lipid
Phospholipids in Large HDL	Lipoprotein and lipid
Phospholipids to Total Lipids in Large HDL percentage	Lipoprotein and lipid
Triglycerides in Large HDL	Lipoprotein and lipid
Triglycerides to Total Lipids in Large HDL percentage	Lipoprotein and lipid
Cholesterol in Large LDL	Lipoprotein and lipid
Cholesterol to Total Lipids in Large LDL percentage	Lipoprotein and lipid
Cholesteryl Esters in Large LDL	Lipoprotein and lipid
Cholesteryl Esters to Total Lipids in Large LDL percentage	Lipoprotein and lipid
Free Cholesterol in Large LDL	Lipoprotein and lipid
Free Cholesterol to Total Lipids in Large LDL percentage	Lipoprotein and lipid
Total Lipids in Large LDL	Lipoprotein and lipid
Concentration of Large LDL Particles	Lipoprotein and lipid
Phospholipids in Large LDL	Lipoprotein and lipid
Phospholipids to Total Lipids in Large LDL percentage	Lipoprotein and lipid
Triglycerides in Large LDL	Lipoprotein and lipid
Triglycerides to Total Lipids in Large LDL percentage	Lipoprotein and lipid
Cholesterol in Large VLDL	Lipoprotein and lipid
Cholesterol to Total Lipids in Large VLDL percentage	Lipoprotein and lipid
Cholesteryl Esters in Large VLDL	Lipoprotein and lipid
Cholesteryl Esters to Total Lipids in Large VLDL percentage	Lipoprotein and lipid
Free Cholesterol in Large VLDL	Lipoprotein and lipid
Free Cholesterol to Total Lipids in Large VLDL percentage	Lipoprotein and lipid
Total Lipids in Large VLDL	Lipoprotein and lipid
Concentration of Large VLDL Particles	Lipoprotein and lipid
Phospholipids in Large VLDL	Lipoprotein and lipid
Phospholipids to Total Lipids in Large VLDL percentage	Lipoprotein and lipid
Triglycerides in Large VLDL	Lipoprotein and lipid
Triglycerides to Total Lipids in Large VLDL percentage	Lipoprotein and lipid
Linoleic Acid	Fatty acids
Linoleic Acid to Total Fatty Acids percentage	Fatty acids
Lactate	Glycolysis related metabolites
LDL Cholesterol	Cholesterol
Cholesteryl Esters in LDL	Cholesterol
Free Cholesterol in LDL	Cholesterol
Total Lipids in LDL	Lipoprotein and lipid
Concentration of LDL Particles	Lipoprotein and lipid
Phospholipids in LDL	Lipoprotein and lipid
Average Diameter for LDL Particles	Lipoprotein and lipid
Triglycerides in LDL	Lipoprotein and lipid
Leucine	Amino acids
Cholesterol in Medium HDL	Lipoprotein and lipid
Cholesterol to Total Lipids in Medium HDL percentage	Lipoprotein and lipid
Cholesteryl Esters in Medium HDL	Lipoprotein and lipid
Cholesteryl Esters to Total Lipids in Medium HDL percentage	Lipoprotein and lipid
Free Cholesterol in Medium HDL	Lipoprotein and lipid
Free Cholesterol to Total Lipids in Medium HDL percentage	Lipoprotein and lipid
Total Lipids in Medium HDL	Lipoprotein and lipid
Concentration of Medium HDL Particles	Lipoprotein and lipid
Phospholipids in Medium HDL	Lipoprotein and lipid
Phospholipids to Total Lipids in Medium HDL percentage	Lipoprotein and lipid
Triglycerides in Medium HDL	Lipoprotein and lipid
Triglycerides to Total Lipids in Medium HDL percentage	Lipoprotein and lipid
Cholesterol in Medium LDL	Lipoprotein and lipid
Cholesterol to Total Lipids in Medium LDL percentage	Lipoprotein and lipid
Cholesteryl Esters in Medium LDL	Lipoprotein and lipid
Cholesteryl Esters to Total Lipids in Medium LDL percentage	Lipoprotein and lipid
Free Cholesterol in Medium LDL	Lipoprotein and lipid
Free Cholesterol to Total Lipids in Medium LDL percentage	Lipoprotein and lipid
Total Lipids in Medium LDL	Lipoprotein and lipid
Concentration of Medium LDL Particles	Lipoprotein and lipid
Phospholipids in Medium LDL	Lipoprotein and lipid
Phospholipids to Total Lipids in Medium LDL percentage	Lipoprotein and lipid
Triglycerides in Medium LDL	Lipoprotein and lipid
Triglycerides to Total Lipids in Medium LDL percentage	Lipoprotein and lipid
Cholesterol in Medium VLDL	Lipoprotein and lipid
Cholesterol to Total Lipids in Medium VLDL percentage	Lipoprotein and lipid
Cholesteryl Esters in Medium VLDL	Lipoprotein and lipid
Cholesteryl Esters to Total Lipids in Medium VLDL percentage	Lipoprotein and lipid
Free Cholesterol in Medium VLDL	Lipoprotein and lipid
Free Cholesterol to Total Lipids in Medium VLDL percentage	Lipoprotein and lipid
Total Lipids in Medium VLDL	Lipoprotein and lipid
Concentration of Medium VLDL Particles	Lipoprotein and lipid
Phospholipids in Medium VLDL	Lipoprotein and lipid
Phospholipids to Total Lipids in Medium VLDL percentage	Lipoprotein and lipid
Triglycerides in Medium VLDL	Lipoprotein and lipid
Triglycerides to Total Lipids in Medium VLDL percentage	Lipoprotein and lipid
Monounsaturated Fatty Acids	Fatty acids
Monounsaturated Fatty Acids to Total Fatty Acids percentage	Fatty acids
Total Cholesterol Minus HDL-C	Cholesterol
Omega-3 Fatty Acids	Fatty acids
Omega-3 Fatty Acids to Total Fatty Acids percentage	Fatty acids
Omega-6 Fatty Acids	Fatty acids
Omega-6 Fatty Acids to Omega-3 Fatty Acids ratio	Fatty acids
Omega-6 Fatty Acids to Total Fatty Acids percentage	Fatty acids
Phenylalanine	Amino acids
Phosphatidylcholines	Lipoprotein and lipid
Phosphoglycerides	Lipoprotein and lipid
Polyunsaturated Fatty Acids	Fatty acids
Polyunsaturated Fatty Acids to Monounsaturated Fatty Acids ratio	Fatty acids
Polyunsaturated Fatty Acids to Total Fatty Acids percentage	Fatty acids
Pyruvate	Glycolysis related metabolites
Remnant Cholesterol (Non-HDL, Non-LDL -Cholesterol)	Cholesterol
Cholesterol in Small HDL	Lipoprotein and lipid
Cholesterol to Total Lipids in Small HDL percentage	Lipoprotein and lipid
Cholesteryl Esters in Small HDL	Lipoprotein and lipid
Cholesteryl Esters to Total Lipids in Small HDL percentage	Lipoprotein and lipid
Free Cholesterol in Small HDL	Lipoprotein and lipid
Free Cholesterol to Total Lipids in Small HDL percentage	Lipoprotein and lipid
Total Lipids in Small HDL	Lipoprotein and lipid
Concentration of Small HDL Particles	Lipoprotein and lipid
Phospholipids in Small HDL	Lipoprotein and lipid
Phospholipids to Total Lipids in Small HDL percentage	Lipoprotein and lipid
Triglycerides in Small HDL	Lipoprotein and lipid
Triglycerides to Total Lipids in Small HDL percentage	Lipoprotein and lipid
Cholesterol in Small LDL	Lipoprotein and lipid
Cholesterol to Total Lipids in Small LDL percentage	Lipoprotein and lipid
Cholesteryl Esters in Small LDL	Lipoprotein and lipid
Cholesteryl Esters to Total Lipids in Small LDL percentage	Lipoprotein and lipid
Free Cholesterol in Small LDL	Lipoprotein and lipid
Free Cholesterol to Total Lipids in Small LDL percentage	Lipoprotein and lipid
Total Lipids in Small LDL	Lipoprotein and lipid
Concentration of Small LDL Particles	Lipoprotein and lipid
Phospholipids in Small LDL	Lipoprotein and lipid
Phospholipids to Total Lipids in Small LDL percentage	Lipoprotein and lipid
Triglycerides in Small LDL	Lipoprotein and lipid
Triglycerides to Total Lipids in Small LDL percentage	Lipoprotein and lipid
Cholesterol in Small VLDL	Lipoprotein and lipid
Cholesterol to Total Lipids in Small VLDL percentage	Lipoprotein and lipid
Cholesteryl Esters in Small VLDL	Lipoprotein and lipid
Cholesteryl Esters to Total Lipids in Small VLDL percentage	Lipoprotein and lipid
Free Cholesterol in Small VLDL	Lipoprotein and lipid
Free Cholesterol to Total Lipids in Small VLDL percentage	Lipoprotein and lipid
Total Lipids in Small VLDL	Lipoprotein and lipid
Concentration of Small VLDL Particles	Lipoprotein and lipid
Phospholipids in Small VLDL	Lipoprotein and lipid
Phospholipids to Total Lipids in Small VLDL percentage	Lipoprotein and lipid
Triglycerides in Small VLDL	Lipoprotein and lipid
Triglycerides to Total Lipids in Small VLDL percentage	Lipoprotein and lipid
Saturated Fatty Acids	Fatty acids
Saturated Fatty Acids to Total Fatty Acids percentage	Fatty acids
Sphingomyelins	Lipoprotein and lipid
Triglycerides to Phosphoglycerides ratio	Lipoprotein and lipid
Total Concentration of Branched-Chain Amino Acids (Leucine + Isoleucine + Valine)	Amino acids
Total Cholesterol	Cholesterol
Total Esterified Cholesterol	Cholesterol
Total Fatty Acids	Fatty acids
Total Free Cholesterol	Cholesterol
Total Lipids in Lipoprotein Particles	Lipoprotein and lipid
Total Concentration of Lipoprotein Particles	Lipoprotein and lipid
Total Phospholipids in Lipoprotein Particles	Lipoprotein and lipid
Total Triglycerides	Lipoprotein and lipid
Tyrosine	Amino acids
Degree of Unsaturation	Fatty acids
Valine	Amino acids
VLDL Cholesterol	Cholesterol
Cholesteryl Esters in VLDL	Cholesterol
Free Cholesterol in VLDL	Cholesterol
Total Lipids in VLDL	Lipoprotein and lipid
Concentration of VLDL Particles	Lipoprotein and lipid
Phospholipids in VLDL	Lipoprotein and lipid
Average Diameter for VLDL Particles	Lipoprotein and lipid
Triglycerides in VLDL	Lipoprotein and lipid
Cholesterol in Very Large HDL	Lipoprotein and lipid
Cholesterol to Total Lipids in Very Large HDL percentage	Lipoprotein and lipid
Cholesteryl Esters in Very Large HDL	Lipoprotein and lipid
Cholesteryl Esters to Total Lipids in Very Large HDL percentage	Lipoprotein and lipid
Free Cholesterol in Very Large HDL	Lipoprotein and lipid
Free Cholesterol to Total Lipids in Very Large HDL percentage	Lipoprotein and lipid
Total Lipids in Very Large HDL	Lipoprotein and lipid
Concentration of Very Large HDL Particles	Lipoprotein and lipid
Phospholipids in Very Large HDL	Lipoprotein and lipid
Phospholipids to Total Lipids in Very Large HDL percentage	Lipoprotein and lipid
Triglycerides in Very Large HDL	Lipoprotein and lipid
Triglycerides to Total Lipids in Very Large HDL percentage	Lipoprotein and lipid
Cholesterol in Very Large VLDL	Lipoprotein and lipid
Cholesterol to Total Lipids in Very Large VLDL percentage	Lipoprotein and lipid
Cholesteryl Esters in Very Large VLDL	Lipoprotein and lipid
Cholesteryl Esters to Total Lipids in Very Large VLDL percentage	Lipoprotein and lipid
Free Cholesterol in Very Large VLDL	Lipoprotein and lipid
Free Cholesterol to Total Lipids in Very Large VLDL percentage	Lipoprotein and lipid
Total Lipids in Very Large VLDL	Lipoprotein and lipid
Concentration of Very Large VLDL Particles	Lipoprotein and lipid
Phospholipids in Very Large VLDL	Lipoprotein and lipid
Phospholipids to Total Lipids in Very Large VLDL percentage	Lipoprotein and lipid
Triglycerides in Very Large VLDL	Lipoprotein and lipid
Triglycerides to Total Lipids in Very Large VLDL percentage	Lipoprotein and lipid
Cholesterol in Very Small VLDL	Lipoprotein and lipid
Cholesterol to Total Lipids in Very Small VLDL percentage	Lipoprotein and lipid
Cholesteryl Esters in Very Small VLDL	Lipoprotein and lipid
Cholesteryl Esters to Total Lipids in Very Small VLDL percentage	Lipoprotein and lipid
Free Cholesterol in Very Small VLDL	Lipoprotein and lipid
Free Cholesterol to Total Lipids in Very Small VLDL percentage	Lipoprotein and lipid
Total Lipids in Very Small VLDL	Lipoprotein and lipid
Concentration of Very Small VLDL Particles	Lipoprotein and lipid
Phospholipids in Very Small VLDL	Lipoprotein and lipid
Phospholipids to Total Lipids in Very Small VLDL percentage	Lipoprotein and lipid
Triglycerides in Very Small VLDL	Lipoprotein and lipid
Triglycerides to Total Lipids in Very Small VLDL percentage	Lipoprotein and lipid
Cholesterol in Chylomicrons and Extremely Large VLDL	Lipoprotein and lipid
Cholesterol to Total Lipids in Chylomicrons and Extremely Large VLDL percentage	Lipoprotein and lipid
Cholesteryl Esters in Chylomicrons and Extremely Large VLDL	Lipoprotein and lipid
Cholesteryl Esters to Total Lipids in Chylomicrons and Extremely Large VLDL percentage	Lipoprotein and lipid
Free Cholesterol in Chylomicrons and Extremely Large VLDL	Lipoprotein and lipid
Free Cholesterol to Total Lipids in Chylomicrons and Extremely Large VLDL percentage	Lipoprotein and lipid
Total Lipids in Chylomicrons and Extremely Large VLDL	Lipoprotein and lipid
Concentration of Chylomicrons and Extremely Large VLDL Particles	Lipoprotein and lipid
Phospholipids in Chylomicrons and Extremely Large VLDL	Lipoprotein and lipid
Phospholipids to Total Lipids in Chylomicrons and Extremely Large VLDL percentage	Lipoprotein and lipid
Triglycerides in Chylomicrons and Extremely Large VLDL	Lipoprotein and lipid
Triglycerides to Total Lipids in Chylomicrons and Extremely Large VLDL percentage	Lipoprotein and lipid
Alkaline phosphatase	Bone and joint
Calcium	Bone and joint
Vitamin D	Bone and joint
IGF-1	Endocrine
SHBG	Endocrine
Testosterone	Endocrine
Apolipoprotein A	Immunometabolic
Cholesterol	Immunometabolic
C-reactive protein	Immunometabolic
Glycated haemoglobin (HbA1c)	Immunometabolic
LDL direct	Immunometabolic
Lipoprotein A	Immunometabolic
Triglycerides	Immunometabolic
Alanine aminotransferase	Liver function
Aspartate aminotransferase	Liver function
Direct bilirubin	Liver function
Gamma glutamyltransferase	Liver function
Total bilirubin	Liver function
Urea	Renal function
Cystatin C	Renal function
Phosphate	Renal function
Total protein	Renal function
Urate	Renal function
Platelet count	Platelet
Platelet crit	Platelet
Mean platelet (thrombocyte) volume	Platelet
Platelet distribution width	Platelet
Red blood cell (erythrocyte) count	Red blood cell
Haemoglobin concentration	Red blood cell
Haematocrit percentage	Red blood cell
Mean corpuscular volume	Red blood cell
Mean corpuscular haemoglobin	Red blood cell
Mean corpuscular haemoglobin concentration	Red blood cell
Red blood cell (erythrocyte) distribution width	Red blood cell
Nucleated red blood cell count	Red blood cell
Nucleated red blood cell percentage	Red blood cell
Reticulocyte percentage	Red blood cell
Reticulocyte count	Red blood cell
Mean reticulocyte volume	Red blood cell
Mean sphered cell volume	Red blood cell
Immature reticulocyte fraction	Red blood cell
High light scatter reticulocyte percentage	Red blood cell
High light scatter reticulocyte count	Red blood cell
White blood cell (leukocyte) count	White blood cell
Lymphocyte count	White blood cell
Monocyte count	White blood cell
Neutrophill count	White blood cell
Eosinophill count	White blood cell
Basophill count	White blood cell
Lymphocyte percentage	White blood cell
Monocyte percentage	White blood cell
Neutrophill percentage	White blood cell
Eosinophill percentage	White blood cell
Basophill percentage	White blood cell

## Sheet: Table7-SurvialAnalysis
The summary of statistics of survival analysis, without regressing age and imaging site from age gap
Target	Organ	Number of All	Number of target	HR	Beta	95% CI (lower)	95% CI (upper)	SE	Z	P	Disease	FDR
F1	Brain_GM	41966	162	1.80971	0.593166	1.69392	1.93342	0.033737	17.582	3.38e-69	Dementia	1.62e-66
F1	meanOverall	45866	195	1.62236	0.483882	1.49327	1.76261	0.0423037	11.4383	2.69e-30	Dementia	1.61e-28
X0	Brain_GM	42012	746	1.37357	0.317414	1.28638	1.46667	0.03346	9.48632	2.39e-21	All-cause mortality	5.74e-19
N1	meanOverall	44778	1098	1.25395	0.226297	1.18992	1.32142	0.026739	8.46318	2.6e-17	Renal failure	7.81e-16
F0	meanOverall	35067	1130	1.23526	0.211281	1.17134	1.30267	0.0271104	7.79335	6.53e-15	Mental and behavioural disorders	1.31e-13
I1	heart	16784	889	1.30639	0.267267	1.22217	1.39642	0.034002	7.86036	3.83e-15	Hypertension	4.99e-13
I6	Brain_WM	39132	520	1.45842	0.377355	1.32694	1.60293	0.048204	7.82821	4.95e-15	Cerebrovascular diseases	4.99e-13
X2	Brain_GM	42012	33	1.90176	0.642778	1.61885	2.2341	0.082176	7.82197	5.2e-15	Nervous system	4.99e-13
F0	Brain_GM	32083	999	1.25618	0.228078	1.18588	1.33065	0.029384	7.76192	8.37e-15	Mental and behavioural disorders	6.69e-13
F1	Brain_WM	39783	135	1.99314	0.68971	1.67149	2.37668	0.089794	7.68103	1.58e-14	Dementia	1.08e-12
I0	meanOverall	25046	2427	1.15553	0.144558	1.11113	1.2017	0.0199888	7.23194	4.76e-13	Circulatory system disorders	7.14e-12
I1	meanOverall	32282	1606	1.18696	0.171392	1.13282	1.24368	0.0238199	7.19536	6.23e-13	Hypertension	7.48e-12
I0	heart	13232	1407	1.21292	0.193029	1.15014	1.27912	0.027114	7.11925	1.09e-12	Circulatory system disorders	6.51e-11
X0	meanOverall	45918	856	1.23027	0.207238	1.1588	1.30616	0.0305372	6.7864	1.15e-11	All-cause mortality	1.15e-10
I6	meanOverall	45030	645	1.25985	0.230992	1.17426	1.35168	0.035896	6.43504	1.23e-10	Cerebrovascular diseases	1.06e-09
I1	Brain_GM	29805	1446	1.17895	0.164621	1.12236	1.23839	0.025098	6.55916	5.41e-11	Hypertension	2.89e-09
F0	Brain_WM	30424	892	1.25085	0.223822	1.16954	1.33781	0.034293	6.52684	6.72e-11	Mental and behavioural disorders	3.22e-09
I6	Brain_GM	41274	567	1.28202	0.248441	1.18736	1.38424	0.039139	6.34769	2.19e-10	Cerebrovascular diseases	9.54e-09
J1	meanOverall	43129	785	1.21458	0.194397	1.13969	1.29439	0.0324718	5.98663	2.14e-09	Influenza and Pneumonia	1.61e-08
I0	Brain_GM	23193	2207	1.14012	0.131131	1.09385	1.18834	0.021135	6.20439	5.49e-10	Circulatory system disorders	2.03e-08
X0	OCT	44823	2833	1.12729	0.119819	1.08546	1.17074	0.019293	6.2104	5.28e-10	All-cause mortality	2.03e-08
G0	Brain_WM	31118	1110	1.23812	0.213596	1.15609	1.32598	0.034977	6.1067	1.02e-09	Nervous system disorders	3.25e-08
I1	Brain_WM	28321	1331	1.18586	0.170469	1.12277	1.25249	0.027892	6.11178	9.85e-10	Hypertension	3.25e-08
G0	Brain_GM	32855	1224	1.17942	0.165023	1.11747	1.2448	0.027529	5.99452	2.04e-09	Nervous system disorders	6.12e-08
F4	meanOverall	40222	421	1.2793	0.246314	1.17557	1.39219	0.0431458	5.70888	1.14e-08	Mood disorders	7.58e-08
I4	meanOverall	45614	471	1.25993	0.231054	1.16355	1.36429	0.0406042	5.69041	1.27e-08	Heart failure	7.6e-08
X0	Brain_WM	39823	681	1.28045	0.247211	1.1791	1.39051	0.042071	5.87597	4.2e-09	All-cause mortality	1.19e-07
E0	meanOverall	30039	2605	1.11081	0.105085	1.06969	1.1535	0.0192417	5.46133	4.73e-08	Endocrine disorders	2.58e-07
G0	meanOverall	35870	1369	1.15191	0.141426	1.09423	1.21264	0.0262123	5.39539	6.84e-08	Nervous system disorders	3.42e-07
J1	Brain_GM	39484	696	1.22826	0.205598	1.14312	1.31975	0.036654	5.60912	2.03e-08	Influenza and Pneumonia	5.42e-07
I3	meanOverall	43328	1234	1.15336	0.142678	1.09405	1.21588	0.0269342	5.29728	1.18e-07	Arrhythmias	5.43e-07
F2	Brain_GM	39528	407	1.29773	0.260614	1.18453	1.42174	0.046565	5.59672	2.18e-08	Substance abuse	5.52e-07
D0	Brain_GM	38403	1187	1.17041	0.157356	1.10673	1.23776	0.028545	5.51264	3.53e-08	Blood and immune disorders	8.48e-07
N1	Brain_GM	40997	966	1.1841	0.168983	1.11476	1.25775	0.030788	5.48866	4.05e-08	Renal failure	9.26e-07
I5	Brain_WM	39261	298	1.41598	0.347824	1.24924	1.60498	0.063924	5.44124	5.29e-08	Stroke	1.15e-06
D1	Brain_GM	39224	990	1.18309	0.168129	1.11294	1.25766	0.031188	5.39086	7.01e-08	Anemia	1.46e-06
N0	meanOverall	25233	1946	1.11749	0.111089	1.07061	1.16644	0.0218699	5.07956	3.78e-07	Genitourinary system disorders	1.62e-06
J0	Brain_GM	21039	1081	1.17047	0.157403	1.10373	1.24124	0.029956	5.2545	1.48e-07	Respiratory system disorders	2.97e-06
F2	meanOverall	43185	456	1.23034	0.207288	1.13245	1.33669	0.0423003	4.90039	9.56e-07	Substance abuse	3.83e-06
H0	meanOverall	33522	2157	1.10712	0.101758	1.06183	1.15433	0.0213081	4.77554	1.79e-06	Eye disorders	6.33e-06
H1	meanOverall	41603	2106	1.10844	0.102949	1.06265	1.15619	0.0215204	4.78379	1.72e-06	Cataracts	6.33e-06
I3	heart	22092	641	1.2229	0.201221	1.13075	1.32255	0.039971	5.03412	4.8e-07	Arrhythmias	9.22e-06
E0	Brain_WM	26285	2157	1.12812	0.120556	1.07575	1.18305	0.024255	4.97045	6.68e-07	Endocrine disorders	1.23e-05
N1	kidney	35152	840	1.18255	0.167675	1.10678	1.26352	0.033789	4.96244	6.96e-07	Renal failure	1.24e-05
J2	OCT	43340	1817	1.12575	0.118447	1.07369	1.18032	0.024155	4.90368	9.41e-07	Chronic obstructive pulmonary disease	1.61e-05
H0	Brain_GM	30728	1926	1.11394	0.107907	1.0659	1.16415	0.022492	4.79753	1.61e-06	Eye disorders	2.66e-05
H2	OCT	44689	891	1.16908	0.156221	1.09624	1.24677	0.032825	4.75923	1.94e-06	Glaucoma	3.11e-05
I5	Brain_GM	41410	328	1.27503	0.242968	1.1533	1.4096	0.051194	4.74605	2.07e-06	Stroke	3.21e-05
J2	meanOverall	43627	423	1.21832	0.197474	1.11627	1.3297	0.0446334	4.42435	9.67e-06	Chronic obstructive pulmonary disease	3.22e-05
D1	meanOverall	42890	1116	1.13653	0.127983	1.0736	1.20316	0.0290668	4.40307	1.07e-05	Anemia	3.37e-05
N1	OCT	44093	2936	1.09245	0.088427	1.05266	1.13375	0.018932	4.6708	3e-06	Renal failure	4.5e-05
X2	meanOverall	45918	39	1.5958	0.467374	1.29064	1.97311	0.108286	4.31613	1.59e-05	Nervous system	4.76e-05
D0	Brain_WM	36381	1081	1.17206	0.158759	1.09567	1.25377	0.034385	4.61714	3.89e-06	Blood and immune disorders	5.66e-05
I5	meanOverall	45187	376	1.22657	0.204226	1.11666	1.34731	0.0479011	4.26348	2.01e-05	Stroke	5.75e-05
I4	Brain_GM	41752	421	1.23413	0.210366	1.12756	1.35077	0.046075	4.56572	4.98e-06	Heart failure	7.03e-05
E0	Brain_GM	27677	2342	1.09691	0.092497	1.05402	1.14154	0.020347	4.54586	5.47e-06	Endocrine disorders	7.5e-05
A0	meanOverall	28504	955	1.1387	0.129889	1.07127	1.21038	0.0311443	4.17054	3.04e-05	Diseases of Infections	8.29e-05
I0	Brain_WM	22019	2039	1.10893	0.103398	1.06024	1.15986	0.022909	4.51341	6.38e-06	Circulatory system disorders	8.51e-05
X1	Brain_GM	42012	413	1.23601	0.211887	1.12642	1.35625	0.047368	4.47323	7.7e-06	Cancer	0.0001
X2	Brain_WM	39823	28	2.40391	0.877098	1.63571	3.5329	0.196443	4.46489	8.01e-06	Nervous system	0.000101
A0	Brain_WM	24528	787	1.20876	0.189591	1.11186	1.31409	0.04263	4.44733	8.69e-06	Diseases of Infections	0.000104
X3	Brain_GM	42012	148	1.38705	0.327176	1.20081	1.60217	0.073564	4.44749	8.69e-06	Circulatory system	0.000104
A0	Brain_GM	26070	856	1.15804	0.146727	1.08533	1.23562	0.033085	4.43486	9.21e-06	Diseases of Infections	0.000105
A1	Brain_GM	37713	916	1.15301	0.142378	1.08269	1.2279	0.032107	4.43451	9.23e-06	Bacterial infections	0.000105
D1	Brain_WM	37162	902	1.18017	0.165656	1.09661	1.27009	0.037467	4.42137	9.81e-06	Anemia	0.000109
J0	meanOverall	22995	1219	1.1187	0.112169	1.06003	1.18062	0.0274858	4.08097	4.48e-05	Respiratory system disorders	0.00011212
X3	meanOverall	45918	170	1.29134	0.255677	1.14224	1.4599	0.0625969	4.0845	4.42e-05	Circulatory system	0.00011212
D0	meanOverall	41995	1339	1.11371	0.107697	1.05672	1.17377	0.0267992	4.01865	5.85e-05	Blood and immune disorders	0.000140477
A1	meanOverall	41184	1025	1.12772	0.120202	1.06318	1.19619	0.0300719	3.99714	6.41e-05	Bacterial infections	0.000147952
N1	Brain_WM	38849	863	1.1758	0.161946	1.09198	1.26605	0.037732	4.29203	1.77e-05	Renal failure	0.000193
N1	Pancreas	28613	625	1.16123	0.149481	1.08415	1.2438	0.035046	4.26535	2e-05	Renal failure	0.000213
N0	Brain_GM	23052	1735	1.10639	0.101099	1.05601	1.15917	0.023776	4.25206	2.12e-05	Genitourinary system disorders	0.000221
F0	OCT	36700	4643	1.0656	0.063538	1.03461	1.09752	0.015058	4.21952	2.45e-05	Mental and behavioural disorders	0.00025
M0	Brain_GM	18058	1802	1.101	0.096219	1.05195	1.15233	0.023251	4.13835	3.5e-05	Musculoskeletal system disorders	0.00035
H1	Brain_GM	38107	1864	1.09921	0.094593	1.05097	1.14967	0.022899	4.13087	3.61e-05	Cataracts	0.000354
I7	heart	22677	263	1.28886	0.253758	1.14179	1.45487	0.061816	4.10508	4.04e-05	Peripheral artery diseases	0.000388
E0	heart	15666	1435	1.1146	0.108495	1.05822	1.17399	0.026486	4.0964	4.2e-05	Endocrine disorders	0.000395
F4	Brain_WM	34893	350	1.28215	0.248537	1.13742	1.4453	0.061113	4.06686	4.77e-05	Mood disorders	0.00044
I4	Brain_WM	39573	379	1.25657	0.228386	1.12522	1.40325	0.056331	4.05438	5.03e-05	Heart failure	0.000455
I3	Brain_GM	39690	1098	1.12588	0.118563	1.06268	1.19283	0.029473	4.02271	5.75e-05	Arrhythmias	0.000511
E2	heart	22327	627	1.16353	0.151459	1.08022	1.25327	0.037905	3.99573	6.45e-05	Obesity	0.000563
I2	meanOverall	43137	1162	1.10772	0.102301	1.04861	1.17016	0.027979	3.65634	0.000255838	Ischemic heart diseases	0.00056853
J2	Brain_WM	37864	336	1.26561	0.235558	1.12728	1.42093	0.05906	3.98846	6.65e-05	Chronic obstructive pulmonary disease	0.00057
I6	heart	22818	355	1.24115	0.21604	1.11507	1.38149	0.054656	3.95269	7.73e-05	Cerebrovascular diseases	0.000651
G1	Brain_GM	41922	58	1.51081	0.412645	1.23096	1.85428	0.104517	3.94811	7.88e-05	Parkinson disease	0.000652
F2	boneSub	13454	163	1.33326	0.28763	1.15336	1.54123	0.073957	3.88913	0.000101	Substance abuse	0.000818
I7	boneSub	13992	171	1.32418	0.280795	1.14896	1.52613	0.07242	3.87729	0.000106	Peripheral artery diseases	0.000845
I4	boneSub	14301	148	1.34136	0.293683	1.15482	1.55802	0.076397	3.84416	0.000121	Heart failure	0.000952
M2	Brain_GM	34795	1751	1.0945	0.090295	1.04495	1.1464	0.023638	3.81995	0.000133	Osteoarthritis	0.001033
H0	OCT	38394	6490	1.049	0.047833	1.0234	1.07523	0.012604	3.7952	0.000148	Eye disorders	0.001124
F4	OCT	40911	1680	1.09865	0.094083	1.04627	1.15365	0.024924	3.77485	0.00016	Mood disorders	0.001201
X1	OCT	44823	1482	1.10476	0.09963	1.0487	1.16382	0.02657	3.74971	0.000177	Cancer	0.001307
H3	meanOverall	36783	715	1.13051	0.12267	1.05287	1.21387	0.0363	3.37933	0.000726626	Ear disorders	0.00155705
K2	meanOverall	45104	557	1.14562	0.135942	1.05816	1.2403	0.0405148	3.35537	0.000792598	Liver diseases	0.00163986
F5	meanOverall	41028	673	1.13598	0.127493	1.05413	1.22418	0.0381519	3.34172	0.000832623	Neurotic disorders	0.00166525
G3	kidney	35447	126	1.40022	0.336631	1.17047	1.67508	0.091444	3.68128	0.000232	Transient ischemic attack	0.001688
X3	OCT	44823	552	1.17058	0.157504	1.07491	1.27477	0.043504	3.62045	0.000294	Circulatory system	0.002107
I7	Brain_WM	38823	403	1.22024	0.19905	1.0952	1.35956	0.05516	3.60858	0.000308	Peripheral artery diseases	0.002173
J2	Pancreas	27921	237	1.23225	0.208841	1.09859	1.38216	0.058578	3.5652	0.000364	Chronic obstructive pulmonary disease	0.002529
H0	Brain_WM	29079	1778	1.10021	0.095505	1.04387	1.1596	0.026824	3.56042	0.00037	Eye disorders	0.002539
I3	Brain_WM	37623	1009	1.13285	0.124741	1.0573	1.21381	0.035215	3.54222	0.000397	Arrhythmias	0.002682
M2	meanOverall	37986	1951	1.07348	0.0709046	1.0273	1.12173	0.0224321	3.16085	0.00157311	Osteoarthritis	0.00304473
I7	meanOverall	44765	515	1.14192	0.132714	1.05106	1.24064	0.0423049	3.13708	0.00170637	Peripheral artery diseases	0.00319944
A1	Brain_WM	35697	841	1.14656	0.136767	1.06174	1.23816	0.039214	3.48772	0.000487	Bacterial infections	0.003208
C2	OCT	44802	344	1.20476	0.186282	1.08479	1.33801	0.053521	3.48055	0.0005	Lung cancer	0.003208
I7	Brain_GM	40971	444	1.17408	0.160482	1.07262	1.28514	0.046114	3.48007	0.000501	Peripheral artery diseases	0.003208
J0	Brain_WM	19873	977	1.12193	0.11505	1.05156	1.19701	0.033049	3.48119	0.000499	Respiratory system disorders	0.003208
M1	Brain_GM	37899	1034	1.11187	0.106044	1.04729	1.18043	0.03053	3.47342	0.000514	Rheumatoid arthritis disorders	0.003246
E1	meanOverall	43441	439	1.14877	0.13869	1.05282	1.25346	0.0444982	3.11676	0.00182853	Diabetes	0.0033246
I2	Brain_GM	39535	1037	1.1104	0.104722	1.04633	1.17839	0.030322	3.45368	0.000553	Ischemic heart diseases	0.003447
M4	Pancreas	20906	604	1.14098	0.131886	1.05823	1.2302	0.038415	3.43324	0.000596	Soft tissue disorders	0.00367
F2	OCT	42073	2367	1.07539	0.072685	1.03142	1.12124	0.021301	3.41222	0.000644	Substance abuse	0.003915
E1	Pancreas	27764	244	1.2011	0.18324	1.07979	1.33604	0.054323	3.37315	0.000743	Diabetes	0.00435
H0	Pancreas	21422	1306	1.09296	0.088889	1.03804	1.15079	0.026304	3.37929	0.000727	Eye disorders	0.00435
J1	OCT	43154	2487	1.07255	0.070036	1.0298	1.11707	0.020752	3.37488	0.000738	Influenza and Pneumonia	0.00435
I4	OCT	44608	1319	1.10073	0.095975	1.04094	1.16396	0.028495	3.36809	0.000757	Heart failure	0.004377
J2	boneSub	13667	138	1.31756	0.275778	1.12174	1.54755	0.08209	3.35944	0.000781	Chronic obstructive pulmonary disease	0.004463
F2	Brain_WM	37467	356	1.21589	0.195481	1.08388	1.36399	0.058642	3.33345	0.000858	Substance abuse	0.004844
M0	meanOverall	19661	2002	1.06801	0.0657955	1.02277	1.11525	0.0220823	2.97956	0.00288665	Musculoskeletal system disorders	0.00509408
M4	Brain_GM	30301	965	1.11043	0.104746	1.04371	1.18141	0.031616	3.31311	0.000923	Soft tissue disorders	0.00515
D0	boneSub	13080	443	1.1632	0.151172	1.06199	1.27405	0.046444	3.25492	0.001134	Blood and immune disorders	0.006234
J2	Brain_GM	39926	380	1.17669	0.162706	1.0668	1.2979	0.050021	3.25278	0.001143	Chronic obstructive pulmonary disease	0.006234
I2	boneSub	13545	358	1.17503	0.161291	1.06469	1.2968	0.05031	3.20594	0.001346	Ischemic heart diseases	0.007261
E1	Brain_WM	37812	370	1.19801	0.180665	1.07176	1.33914	0.056819	3.17965	0.001475	Diabetes	0.007864
K1	meanOverall	43902	446	1.14253	0.133249	1.04195	1.25282	0.0470165	2.83409	0.00459567	Inflammatory bowel disease	0.00787828
C6	liver	27028	66	0.665014	-0.40795	0.516845	0.85566	0.128607	-3.17205	0.001514	Leukaemia	0.007897
D0	OCT	42464	3955	1.05292	0.051567	1.01992	1.08698	0.016245	3.17444	0.001501	Blood and immune disorders	0.007897
N0	Pancreas	15986	1131	1.09272	0.088669	1.03439	1.15434	0.027991	3.16777	0.001536	Genitourinary system disorders	0.007928
E2	OCT	43797	3388	1.05715	0.055574	1.02119	1.09438	0.017658	3.14717	0.001649	Obesity	0.008418
M2	boneSub	11863	615	1.13441	0.126111	1.04848	1.22738	0.040192	3.13775	0.001702	Osteoarthritis	0.008602
G3	meanOverall	45251	162	1.22537	0.203247	1.06187	1.41405	0.0730682	2.7816	0.00540911	Transient ischemic attack	0.00901518
I2	heart	22347	654	1.13075	0.122883	1.04671	1.22154	0.039403	3.11866	0.001817	Ischemic heart diseases	0.009084
N0	Brain_WM	21795	1584	1.09726	0.09282	1.03494	1.16334	0.029836	3.11105	0.001864	Genitourinary system disorders	0.009225
H1	OCT	43462	4214	1.04976	0.048559	1.01788	1.08263	0.015732	3.08658	0.002025	Cataracts	0.009917
F3	Brain_GM	41950	22	1.43774	0.363071	1.13677	1.81839	0.119839	3.02966	0.002448	Pyschotic disorders	0.011871
I4	heart	23200	217	1.23042	0.207355	1.07576	1.40731	0.068536	3.0255	0.002482	Heart failure	0.011915
J1	Brain_WM	37417	642	1.14262	0.13332	1.04784	1.24597	0.04418	3.01767	0.002547	Influenza and Pneumonia	0.012106
D1	boneSub	13388	372	1.16225	0.150357	1.05251	1.28343	0.050601	2.97141	0.002964	Anemia	0.01395
M2	Brain_WM	32974	1615	1.08619	0.08268	1.02829	1.14736	0.027953	2.95787	0.003098	Osteoarthritis	0.014436
X1	kidney	35966	385	0.878436	-0.12961	0.805953	0.957438	0.043939	-2.94984	0.003179	Cancer	0.014674
E2	boneSub	13713	407	1.1433	0.133922	1.04529	1.25051	0.04573	2.92855	0.003406	Obesity	0.015568
H3	Brain_WM	31885	583	1.1483	0.138286	1.04652	1.25999	0.047356	2.92015	0.003499	Ear disorders	0.015843
H3	Brain_GM	33688	636	1.11969	0.113049	1.0376	1.20827	0.038849	2.90999	0.003614	Ear disorders	0.016214
X4	Brain_GM	42012	43	1.47222	0.386769	1.13368	1.91185	0.133319	2.90107	0.003719	Respiratory system	0.016528
N1	boneSub	14036	323	1.16726	0.154656	1.05114	1.2962	0.053459	2.89299	0.003816	Renal failure	0.016804
I0	OCT	28402	7572	1.03399	0.033429	1.01059	1.05794	0.01168	2.86206	0.004209	Circulatory system disorders	0.018366
F0	boneSub	10556	359	1.15802	0.146708	1.04671	1.28115	0.051558	2.84548	0.004435	Mental and behavioural disorders	0.019176
E2	Brain_GM	40143	1076	1.08925	0.08549	1.02663	1.15569	0.030209	2.82995	0.004655	Obesity	0.019775
I3	OCT	43472	3393	1.05086	0.049607	1.01538	1.08758	0.017523	2.8309	0.004642	Arrhythmias	0.019775
I5	heart	22878	219	1.21392	0.193853	1.06046	1.38958	0.068954	2.81134	0.004934	Stroke	0.020773
M2	heart	19267	1105	1.09019	0.086355	1.02634	1.15802	0.030793	2.80434	0.005042	Osteoarthritis	0.021045
X4	meanOverall	45918	50	1.32181	0.279005	1.05872	1.65028	0.113237	2.4639	0.0137433	Respiratory system	0.0222864
F4	boneSub	12270	115	1.28098	0.247626	1.07537	1.5259	0.089265	2.77405	0.005536	Mood disorders	0.022713
I1	OCT	33432	5219	1.04004	0.039255	1.01159	1.06928	0.014147	2.77475	0.005524	Hypertension	0.022713
I0	Pancreas	16084	1417	1.07054	0.068159	1.02003	1.12354	0.024658	2.76418	0.005707	Circulatory system disorders	0.023213
I4	Pancreas	29140	252	1.16027	0.148655	1.04356	1.29004	0.054091	2.74821	0.005992	Heart failure	0.02417
D1	OCT	43095	3153	1.05113	0.049862	1.01431	1.08928	0.018193	2.74078	0.006129	Anemia	0.024517
X0	boneSub	14372	271	1.17499	0.161256	1.04656	1.31917	0.059057	2.73049	0.006324	All-cause mortality	0.025087
F4	Brain_GM	36782	383	1.1456	0.13593	1.03781	1.26458	0.050416	2.69617	0.007014	Mood disorders	0.027597
X2	liver	27201	13	0.489174	-0.71504	0.289416	0.826807	0.267787	-2.67017	0.007581	Nervous system	0.029586
M0	kidney	15350	1622	0.939149	-0.06278	0.896676	0.983633	0.023612	-2.65883	0.007841	Musculoskeletal system disorders	0.03011
M1	liver	24347	536	0.886325	-0.12067	0.810902	0.968763	0.045376	-2.65933	0.00783	Rheumatoid arthritis disorders	0.03011
M0	Brain_WM	17042	1630	1.07111	0.068692	1.01805	1.12692	0.025918	2.65032	0.008041	Musculoskeletal system disorders	0.030634
X3	Brain_WM	39823	139	1.27438	0.24246	1.06241	1.52864	0.092818	2.61222	0.008996	Circulatory system	0.033999
K0	meanOverall	21260	3290	1.04118	0.0403589	1.00585	1.07776	0.0176141	2.29129	0.0219468	Digestive system disorders	0.0346529
G2	OCT	44340	289	1.16608	0.15365	1.03824	1.30967	0.059247	2.59337	0.009504	Epilepsy	0.03564
D1	liver	25342	544	0.891384	-0.11498	0.816552	0.973074	0.044738	-2.57008	0.010167	Anemia	0.037832
X4	heart	23237	27	0.688425	-0.37335	0.517192	0.91635	0.145917	-2.55864	0.010508	Respiratory system	0.0388
G1	Brain_WM	39741	52	1.46266	0.380253	1.09175	1.95958	0.149225	2.5482	0.010828	Parkinson disease	0.039676
E1	Brain_GM	39847	396	1.13239	0.124334	1.02878	1.24644	0.048958	2.53959	0.011098	Diabetes	0.040054
K1	Brain_GM	40166	404	1.13333	0.125159	1.02899	1.24825	0.049277	2.53991	0.011088	Inflammatory bowel disease	0.040054
X1	Brain_WM	39823	389	1.1523	0.141761	1.03203	1.28659	0.056242	2.52057	0.011716	Cancer	0.041969
G1	meanOverall	45815	70	1.26417	0.234412	1.02464	1.55968	0.107179	2.1871	0.0287351	Parkinson disease	0.0442078
F3	meanOverall	45849	27	1.39296	0.33143	1.03253	1.8792	0.152766	2.16953	0.0300425	Pyschotic disorders	0.0450637
F4	heart	20230	240	1.17638	0.162444	1.03516	1.33687	0.065249	2.48959	0.012789	Mood disorders	0.045473
I2	OCT	42708	3161	1.04639	0.04535	1.00966	1.08447	0.018235	2.48692	0.012886	Ischemic heart diseases	0.045478
X3	heart	23237	79	1.31194	0.271506	1.05717	1.62811	0.110162	2.46461	0.013716	Circulatory system	0.048058
D0	liver	24789	647	0.903785	-0.10116	0.833764	0.979687	0.041144	-2.45875	0.013942	Blood and immune disorders	0.048495
K0	OCT	27621	10175	1.02478	0.024479	1.00492	1.04503	0.009984	2.45179	0.014215	Digestive system disorders	0.049087
H3	kidney	28711	572	1.10867	0.103163	1.02063	1.2043	0.042214	2.44379	0.014534	Ear disorders	0.049831
K2	OCT	44411	1395	1.06929	0.066991	1.01327	1.12839	0.027451	2.44037	0.014672	Liver diseases	0.049948
E0	OCT	33547	7828	1.02849	0.02809	1.0055	1.05201	0.011536	2.43497	0.014893	Endocrine disorders	0.050342
F4	Pancreas	25598	236	1.15943	0.14793	1.02846	1.30708	0.061156	2.41889	0.015568	Mood disorders	0.052256
M4	meanOverall	33036	1069	1.06545	0.063394	1.00421	1.13042	0.0302008	2.09909	0.0358094	Soft tissue disorders	0.052404
I0	kidney	19836	1968	0.950359	-0.05092	0.911428	0.990954	0.021341	-2.38579	0.017042	Circulatory system disorders	0.056808
G4	heart	22602	114	1.23812	0.213592	1.03809	1.47668	0.089903	2.37581	0.017511	Sleep disorders	0.057966
H1	Pancreas	26643	1299	1.06441	0.062416	1.01063	1.12104	0.026451	2.3597	0.01829	Cataracts	0.060131
X2	OCT	44823	163	1.19471	0.177905	1.02911	1.38696	0.076129	2.33691	0.019444	Nervous system	0.063491
J0	boneSub	7019	382	1.12289	0.115906	1.01721	1.23954	0.050429	2.29842	0.021538	Respiratory system disorders	0.069852
G4	Pancreas	28450	118	1.20012	0.18242	1.02666	1.40288	0.07965	2.29028	0.022005	Sleep disorders	0.070888
E2	kidney	34372	955	0.941367	-0.06042	0.893245	0.992083	0.026772	-2.25686	0.024017	Obesity	0.07683
J0	OCT	28486	5519	1.03191	0.031408	1.00411	1.06047	0.013932	2.25443	0.024169	Respiratory system disorders	0.07683
K1	Brain_WM	38086	382	1.14015	0.131156	1.0165	1.27883	0.058567	2.23941	0.025129	Inflammatory bowel disease	0.079356
X1	meanOverall	45918	465	1.08931	0.0855436	0.997537	1.18952	0.0449039	1.90504	0.0567751	Cancer	0.0811073
X4	Pancreas	29320	26	1.41681	0.348406	1.04239	1.92571	0.15658	2.2251	0.026074	Respiratory system	0.081802
M0	OCT	25822	7987	1.02531	0.024991	1.00265	1.04848	0.011401	2.19205	0.028376	Musculoskeletal system disorders	0.088445
H1	Brain_WM	36103	1729	1.05962	0.057906	1.00596	1.11614	0.026513	2.18404	0.02896	Cataracts	0.089681
M2	kidney	29855	1582	0.948957	-0.05239	0.904927	0.995129	0.02424	-2.16139	0.030665	Osteoarthritis	0.094355
C2	Brain_WM	39803	58	1.35279	0.302172	1.02485	1.78568	0.141649	2.13325	0.032904	Lung cancer	0.100598
K2	Brain_GM	41272	488	1.09988	0.095203	1.00732	1.20095	0.044851	2.12263	0.033785	Liver diseases	0.102637
C0	kidney	31785	1714	0.952242	-0.04894	0.909999	0.996445	0.023151	-2.1138	0.034532	Cancer	0.103615
X0	Pancreas	29320	465	1.09312	0.089036	1.0065	1.1872	0.042122	2.11373	0.034538	All-cause mortality	0.103615
K2	Pancreas	28797	321	1.11462	0.108517	1.00725	1.23344	0.051681	2.09973	0.035752	Liver diseases	0.106591
L1	OCT	38694	3193	1.03831	0.037596	1.00226	1.07566	0.018028	2.08537	0.037035	Infections and excema	0.109735
C0	Brain_GM	37036	1899	1.04828	0.047154	1.00253	1.09612	0.022767	2.07115	0.038345	Cancer	0.112654
F5	heart	20631	365	1.1172	0.110828	1.00589	1.24083	0.05355	2.0696	0.03849	Neurotic disorders	0.112654
E0	boneSub	9317	824	1.07231	0.069812	1.00331	1.14605	0.033935	2.05724	0.039663	Endocrine disorders	0.115384
M4	Brain_WM	28646	876	1.07624	0.073476	1.00287	1.15499	0.036028	2.03944	0.041406	Soft tissue disorders	0.11847
X3	boneSub	14372	46	1.32022	0.277797	1.01115	1.72376	0.136078	2.04144	0.041207	Circulatory system	0.11847
X4	boneSub	14372	15	1.64149	0.495602	1.01936	2.6433	0.243079	2.03885	0.041465	Respiratory system	0.11847
E2	Pancreas	27986	688	1.07042	0.068053	1.00253	1.14291	0.033434	2.03542	0.041809	Obesity	0.118747
I6	OCT	44124	1578	1.0536	0.052209	1.0016	1.10829	0.025822	2.02191	0.043186	Cerebrovascular diseases	0.121936
J1	heart	21875	406	1.10544	0.100244	1.00231	1.21918	0.049968	2.00615	0.04484	Influenza and Pneumonia	0.125866
J1	Pancreas	27543	441	1.09105	0.087142	1.00102	1.18918	0.04394	1.9832	0.047345	Influenza and Pneumonia	0.132126
L1	Brain_GM	32710	476	1.09295	0.08888	1.00017	1.19433	0.04526	1.96378	0.049556	Infections and excema	0.137057
M0	boneSub	5858	640	1.08106	0.07794	1.00011	1.16856	0.039711	1.96268	0.049683	Musculoskeletal system disorders	0.137057
F0	heart	17612	643	1.08048	0.07741	0.999106	1.16849	0.039952	1.93758	0.052674	Mental and behavioural disorders	0.144477
C5	meanOverall	45002	394	1.07974	0.0767234	0.983906	1.18492	0.0474233	1.61784	0.105697	Prostate cancer	0.147484
N1	heart	22745	571	1.08431	0.080941	0.997601	1.17855	0.042523	1.90347	0.056979	Renal failure	0.155397
L1	meanOverall	35737	534	1.06902	0.0667397	0.983499	1.16197	0.042541	1.56883	0.116687	Infections and excema	0.159118
I5	OCT	44191	861	1.06814	0.065917	0.997531	1.14374	0.034893	1.88912	0.058876	Stroke	0.159664
M4	boneSub	10083	339	1.10667	0.101355	0.996038	1.22959	0.053738	1.88608	0.059284	Soft tissue disorders	0.159866
N0	OCT	29780	6675	1.02377	0.023493	0.999044	1.04911	0.012475	1.88328	0.059663	Genitourinary system disorders	0.159989
C6	meanOverall	45635	141	0.883069	-0.124352	0.754731	1.03323	0.0801247	-1.55198	0.120666	Leukaemia	0.160888
G1	Pancreas	29253	42	1.2724	0.240905	0.989012	1.63699	0.12855	1.87402	0.060928	Parkinson disease	0.162475
E0	Pancreas	19186	1474	1.04653	0.045479	0.997798	1.09764	0.024329	1.86934	0.061575	Endocrine disorders	0.163293
A1	boneSub	12846	339	1.10403	0.098965	0.995064	1.22492	0.053018	1.86663	0.061953	Bacterial infections	0.163393
D0	kidney	32892	1068	0.947664	-0.05375	0.895536	1.00283	0.028867	-1.86215	0.062581	Blood and immune disorders	0.164148
D1	heart	21717	615	1.07951	0.076506	0.995713	1.17036	0.041226	1.85576	0.063488	Anemia	0.164727
K0	Brain_GM	19515	2991	1.03453	0.033945	0.99811	1.07227	0.018284	1.85649	0.063384	Digestive system disorders	0.164727
A0	boneSub	8870	306	1.10947	0.103887	0.993392	1.23912	0.056387	1.84238	0.065419	Diseases of Infections	0.168823
G0	heart	18115	769	1.06954	0.067233	0.995507	1.14909	0.036601	1.83692	0.066221	Nervous system disorders	0.16998
C5	boneSub	14121	140	1.15799	0.146682	0.989422	1.35527	0.080265	1.82747	0.067629	Prostate cancer	0.171757
I7	liver	26540	271	0.890648	-0.11581	0.786746	1.00827	0.063289	-1.82979	0.067281	Peripheral artery diseases	0.171757
F5	Brain_GM	37517	607	1.07689	0.074079	0.994123	1.16655	0.040804	1.81551	0.069446	Neurotic disorders	0.175443
H3	boneSub	11412	224	1.12717	0.119707	0.990166	1.28312	0.066119	1.8105	0.070219	Ear disorders	0.176467
K1	Pancreas	28090	275	1.11266	0.106751	0.990823	1.24947	0.05917	1.80415	0.071208	Inflammatory bowel disease	0.178019
G3	Brain_WM	39280	132	1.19139	0.17512	0.984345	1.44198	0.097399	1.79796	0.072184	Transient ischemic attack	0.179298
I3	boneSub	13547	396	1.09221	0.088201	0.99199	1.20255	0.049105	1.79618	0.072466	Arrhythmias	0.179298
A1	OCT	42805	3306	1.03225	0.031746	0.997004	1.06875	0.017728	1.79069	0.073344	Bacterial infections	0.180539
K1	OCT	43213	1351	1.05053	0.049298	0.994882	1.1093	0.02777	1.77521	0.075863	Inflammatory bowel disease	0.185787
L0	Pancreas	17563	645	1.06963	0.067314	0.992475	1.15279	0.038199	1.76222	0.078032	Skin disorders	0.19013
F1	OCT	44773	682	1.07096	0.068552	0.991837	1.15639	0.039158	1.75065	0.080006	Dementia	0.193955
X1	heart	23237	258	0.896031	-0.10978	0.791906	1.01385	0.063027	-1.74179	0.081545	Cancer	0.196691
M4	kidney	25763	871	0.945583	-0.05595	0.887321	1.00767	0.032447	-1.72446	0.084625	Soft tissue disorders	0.2031
E2	meanOverall	43819	1210	1.03871	0.0379776	0.985324	1.09498	0.0269201	1.41075	0.158319	Obesity	0.206502
F0	Pancreas	22251	629	1.06787	0.065668	0.989905	1.15198	0.038682	1.69765	0.089574	Mental and behavioural disorders	0.213907
M0	Pancreas	12309	1141	1.05	0.04879	0.992364	1.11098	0.028804	1.69386	0.090293	Musculoskeletal system disorders	0.214557
C2	meanOverall	45894	73	1.163	0.150999	0.936421	1.44439	0.110558	1.36579	0.172004	Lung cancer	0.215006
G4	meanOverall	44583	232	1.08692	0.0833524	0.964512	1.22487	0.0609632	1.36726	0.171545	Sleep disorders	0.215006
F2	heart	21904	260	1.10833	0.102852	0.982861	1.24981	0.061296	1.67794	0.093359	Substance abuse	0.22075
G2	liver	26955	40	0.759805	-0.27469	0.55043	1.04882	0.164473	-1.67014	0.094891	Epilepsy	0.223273
A0	Pancreas	17394	507	1.07255	0.070035	0.987007	1.1655	0.042405	1.65157	0.098623	Diseases of Infections	0.230922
C4	heart	22746	128	1.16644	0.153953	0.96987	1.40284	0.094158	1.63505	0.102038	Breast cancer	0.237758
J1	boneSub	13502	254	1.10464	0.099523	0.979399	1.24591	0.061399	1.62093	0.105033	Influenza and Pneumonia	0.242951
K1	boneSub	13749	162	1.13709	0.128472	0.97338	1.32833	0.079314	1.61978	0.105279	Inflammatory bowel disease	0.242951
X0	liver	27201	378	0.918298	-0.08523	0.828032	1.01841	0.052792	-1.6145	0.10642	All-cause mortality	0.244409
C0	OCT	41865	5958	1.02126	0.021036	0.995286	1.04791	0.013144	1.60045	0.109498	Cancer	0.244461
C1	Brain_GM	41942	156	1.13272	0.124619	0.973254	1.31831	0.077414	1.60977	0.107448	Colorectal cancer	0.244461
C4	Brain_GM	40997	214	1.11586	0.109626	0.975809	1.27601	0.068427	1.60208	0.109137	Breast cancer	0.244461
E2	liver	25980	582	0.939601	-0.0623	0.870962	1.01365	0.038703	-1.60969	0.107465	Obesity	0.244461
G0	Pancreas	22803	770	1.0572	0.055622	0.98787	1.13139	0.034606	1.60731	0.107987	Nervous system disorders	0.244461
M3	OCT	43222	1207	1.04826	0.047133	0.989535	1.11047	0.029415	1.60232	0.109086	Sciatica	0.244461
L1	Pancreas	22643	277	1.0957	0.091396	0.978854	1.2265	0.057536	1.5885	0.112173	Infections and excema	0.249273
C1	meanOverall	45838	168	1.0977	0.0932178	0.948994	1.26971	0.0742722	1.25508	0.209448	Colorectal cancer	0.253807
M1	meanOverall	41407	1129	1.03758	0.0368948	0.979237	1.09941	0.0295292	1.24943	0.211506	Rheumatoid arthritis disorders	0.253807
X2	heart	23237	25	1.3952	0.333036	0.921245	2.11299	0.211772	1.57262	0.115807	Nervous system	0.256164
K0	liver	12550	1676	0.961263	-0.03951	0.9147	1.0102	0.025333	-1.5595	0.118877	Digestive system disorders	0.261748
K0	heart	11031	1923	1.03639	0.035745	0.990596	1.0843	0.023058	1.55021	0.12109	Digestive system disorders	0.265287
M3	boneSub	13471	103	1.1603	0.148679	0.961221	1.40061	0.096038	1.54813	0.12159	Sciatica	0.265287
L0	Brain_GM	25526	1016	1.04954	0.048356	0.987069	1.11597	0.031312	1.54431	0.122513	Skin disorders	0.266091
K2	heart	22873	306	1.09192	0.087936	0.976005	1.2216	0.057258	1.53579	0.12459	Liver diseases	0.269384
C2	liver	27191	39	0.778598	-0.25026	0.564855	1.07322	0.163741	-1.52839	0.126416	Lung cancer	0.270891
I2	Brain_WM	37522	945	1.05703	0.055462	0.984559	1.13483	0.036237	1.53054	0.125883	Ischemic heart diseases	0.270891
E2	Brain_WM	38063	992	1.05706	0.055492	0.984078	1.13545	0.036501	1.52026	0.128445	Obesity	0.274017
G0	kidney	28056	1092	0.956841	-0.04412	0.903746	1.01306	0.029128	-1.51464	0.129863	Nervous system disorders	0.275816
X3	liver	27201	74	0.839737	-0.17467	0.669529	1.05322	0.11557	-1.51134	0.130702	Circulatory system	0.276373
F5	Pancreas	26044	371	1.0799	0.07687	0.977284	1.19329	0.050944	1.50892	0.131321	Neurotic disorders	0.276464
C0	meanOverall	40399	2094	1.0261	0.0257682	0.983319	1.07075	0.0217299	1.18584	0.235684	Cancer	0.277276
A0	OCT	36558	4597	1.02275	0.022495	0.993048	1.05334	0.015037	1.49599	0.134656	Diseases of Infections	0.278287
C3	kidney	33785	838	0.951361	-0.04986	0.891102	1.01569	0.033385	-1.49353	0.135298	Melanoma	0.278287
E1	kidney	34095	326	0.931048	-0.07144	0.847679	1.02262	0.047863	-1.4927	0.135515	Diabetes	0.278287
I1	kidney	25432	1291	0.961632	-0.03912	0.913662	1.01212	0.026108	-1.49853	0.133995	Hypertension	0.278287
J0	Pancreas	14373	668	1.0562	0.054679	0.983175	1.13465	0.036555	1.49578	0.134712	Respiratory system disorders	0.278287
N0	heart	12764	1064	1.04722	0.046138	0.985638	1.11265	0.030921	1.49213	0.135665	Genitourinary system disorders	0.278287
G3	heart	22917	92	1.17313	0.159674	0.949801	1.44897	0.107745	1.48196	0.138351	Transient ischemic attack	0.282589
H1	heart	21297	1156	1.04686	0.045792	0.985097	1.11249	0.031025	1.47599	0.139948	Cataracts	0.283439
K2	boneSub	14130	200	1.10612	0.100859	0.967541	1.26455	0.068295	1.4768	0.139728	Liver diseases	0.283439
D0	Pancreas	26714	750	1.0519	0.050597	0.982518	1.12618	0.034813	1.45337	0.146121	Blood and immune disorders	0.29404
F4	liver	23847	214	1.10543	0.100231	0.965431	1.26572	0.069089	1.45075	0.14685	Mood disorders	0.29404
G4	OCT	43881	912	1.05053	0.049295	0.98265	1.1231	0.034081	1.44642	0.148059	Sleep disorders	0.29404
I1	Pancreas	20797	950	1.0442	0.043254	0.984831	1.10715	0.029868	1.44819	0.147565	Hypertension	0.29404
M2	liver	22668	980	0.952885	-0.04826	0.892537	1.01731	0.033381	-1.44576	0.148245	Osteoarthritis	0.29404
J2	heart	22144	249	1.09677	0.092373	0.966066	1.24517	0.064744	1.42674	0.153655	Chronic obstructive pulmonary disease	0.303517
K3	kidney	35834	64	0.860629	-0.15009	0.698687	1.06011	0.10636	-1.41117	0.158196	Pancreatitis	0.311204
F1	heart	23211	103	1.1561	0.145048	0.943585	1.41647	0.103633	1.39963	0.161624	Dementia	0.316651
F1	Pancreas	29292	99	1.13509	0.126716	0.949182	1.35742	0.091262	1.38848	0.164991	Dementia	0.321934
N0	kidney	19752	1534	1.03524	0.034637	0.985437	1.08757	0.025157	1.37682	0.168569	Genitourinary system disorders	0.327583
I2	kidney	33887	915	1.0438	0.042863	0.981127	1.11047	0.031591	1.35684	0.174833	Ischemic heart diseases	0.338387
F1	boneSub	14357	62	1.18177	0.16701	0.926599	1.5072	0.124107	1.3457	0.1784	Dementia	0.343903
H0	kidney	26371	1714	0.969174	-0.03131	0.925462	1.01495	0.023547	-1.32976	0.183596	Eye disorders	0.352504
D1	kidney	33626	892	0.95882	-0.04205	0.900979	1.02037	0.031746	-1.32463	0.185293	Anemia	0.354346
X4	OCT	44823	185	1.1052	0.100024	0.952105	1.28291	0.076075	1.31482	0.188572	Respiratory system	0.359185
I2	liver	25621	573	0.94613	-0.05538	0.87096	1.02779	0.042237	-1.31106	0.189837	Ischemic heart diseases	0.359625
X0	kidney	35966	681	0.954898	-0.04615	0.891174	1.02318	0.035238	-1.30969	0.190302	All-cause mortality	0.359625
G1	boneSub	14342	18	0.73916	-0.30224	0.469224	1.16439	0.231859	-1.30355	0.192386	Parkinson disease	0.360724
J1	kidney	33798	590	1.05322	0.051856	0.974275	1.13857	0.039755	1.30441	0.192095	Influenza and Pneumonia	0.360724
C5	heart	22820	243	1.08391	0.080579	0.958678	1.22551	0.062644	1.28631	0.198334	Prostate cancer	0.363787
E1	boneSub	13600	117	1.11947	0.112855	0.942523	1.32963	0.087782	1.28562	0.198575	Diabetes	0.363787
F5	Brain_WM	35529	543	1.06553	0.063477	0.966978	1.17413	0.049519	1.28186	0.199892	Neurotic disorders	0.363787
G0	OCT	38589	4809	1.01905	0.018871	0.99031	1.04862	0.014596	1.29286	0.196059	Nervous system disorders	0.363787
I4	liver	27050	216	0.915971	-0.08777	0.800893	1.04758	0.0685	-1.28132	0.200083	Heart failure	0.363787
K2	Brain_WM	39117	451	1.07134	0.068914	0.964996	1.18941	0.05334	1.29197	0.196368	Liver diseases	0.363787
X2	boneSub	14372	15	1.37903	0.321383	0.844166	2.25279	0.250407	1.28344	0.199338	Nervous system	0.363787
X4	kidney	35966	40	1.22443	0.202471	0.901318	1.66336	0.156313	1.29529	0.195219	Respiratory system	0.363787
I3	Pancreas	27639	729	1.04453	0.043565	0.976863	1.11688	0.034171	1.27491	0.202342	Arrhythmias	0.365128
I7	OCT	44097	1409	1.03543	0.034813	0.981507	1.09231	0.027286	1.27587	0.202002	Peripheral artery diseases	0.365128
G4	boneSub	13938	67	1.1535	0.142802	0.924719	1.43889	0.112792	1.26607	0.205487	Sleep disorders	0.368037
J0	liver	13478	565	0.9466	-0.05488	0.869578	1.03045	0.043301	-1.26736	0.205026	Respiratory system disorders	0.368037
A1	Pancreas	26169	602	1.04988	0.048674	0.973171	1.13263	0.03871	1.25741	0.208605	Bacterial infections	0.369863
G0	boneSub	11074	412	1.06335	0.061425	0.965939	1.17059	0.049021	1.25303	0.210195	Nervous system disorders	0.369863
G2	Brain_WM	39489	58	1.20261	0.184491	0.902291	1.60288	0.146589	1.25856	0.208189	Epilepsy	0.369863
H2	Brain_WM	38651	257	1.09134	0.087407	0.951836	1.25129	0.069782	1.25258	0.21036	Glaucoma	0.369863
M1	OCT	42107	3133	1.02308	0.022818	0.987212	1.06025	0.018209	1.25314	0.210154	Rheumatoid arthritis disorders	0.369863
C1	Brain_WM	39761	150	1.11952	0.112903	0.937341	1.33712	0.09062	1.2459	0.212801	Colorectal cancer	0.37279
X4	Brain_WM	39823	31	1.27368	0.241913	0.8669	1.87135	0.196302	1.23235	0.217819	Respiratory system	0.380192
I1	boneSub	10162	537	1.05294	0.051588	0.969172	1.14395	0.042297	1.21964	0.2226	Hypertension	0.38713
H2	meanOverall	44550	320	1.05426	0.0528386	0.945679	1.17531	0.0554556	0.952808	0.340687	Glaucoma	0.393101
C6	OCT	44618	422	0.94413	-0.05749	0.859898	1.03661	0.047679	-1.20579	0.227897	Leukaemia	0.394911
K0	Pancreas	13552	1907	1.02747	0.027095	0.983047	1.07389	0.022548	1.20166	0.229495	Digestive system disorders	0.39625
C4	kidney	35121	187	0.910346	-0.09393	0.779528	1.06312	0.079152	-1.18671	0.235342	Breast cancer	0.40489
A0	heart	14528	527	1.05295	0.051593	0.965697	1.14808	0.044132	1.16905	0.242384	Diseases of Infections	0.414392
L0	boneSub	8539	350	0.938497	-0.06348	0.843714	1.04393	0.05432	-1.16853	0.242592	Skin disorders	0.414392
D1	Pancreas	27312	624	1.04517	0.04418	0.969924	1.12626	0.038122	1.15891	0.246492	Anemia	0.419561
C3	heart	21832	628	0.954963	-0.04608	0.882008	1.03395	0.040548	-1.1365	0.255747	Melanoma	0.433776
K3	heart	23148	50	1.17134	0.158151	0.889846	1.54189	0.140236	1.12775	0.259426	Pancreatitis	0.438467
C6	kidney	35747	116	0.90784	-0.09669	0.766923	1.07465	0.086064	-1.12343	0.261255	Leukaemia	0.440008
H2	Brain_GM	40774	281	1.06773	0.065537	0.950946	1.19886	0.059101	1.10891	0.267471	Glaucoma	0.448902
E0	liver	17876	1282	0.969434	-0.03104	0.917092	1.02476	0.028319	-1.09618	0.273001	Endocrine disorders	0.456588
C2	Brain_GM	41991	65	1.13999	0.131018	0.900624	1.44297	0.12025	1.08954	0.275914	Lung cancer	0.459857
J3	Brain_GM	36278	260	1.06906	0.066777	0.947062	1.20677	0.061821	1.08016	0.280071	Asthma	0.461972
M3	liver	25626	187	0.92081	-0.0825	0.793232	1.06891	0.076092	-1.08424	0.27826	Sciatica	0.461972
X3	Pancreas	29320	85	1.10737	0.101992	0.920509	1.33218	0.094298	1.08159	0.279433	Circulatory system	0.461972
C2	kidney	35947	65	0.889908	-0.11664	0.718322	1.10248	0.109288	-1.06724	0.285863	Lung cancer	0.469912
I0	boneSub	7917	818	1.03739	0.036707	0.96954	1.10998	0.034511	1.06362	0.287499	Circulatory system disorders	0.470989
K3	Pancreas	29218	49	1.14878	0.138704	0.888976	1.48452	0.130813	1.06032	0.288998	Pancreatitis	0.471833
I5	boneSub	14158	120	1.09926	0.094634	0.92248	1.30991	0.089453	1.05792	0.29009	Stroke	0.472011
X4	liver	27201	22	0.797644	-0.22609	0.524159	1.21382	0.214222	-1.05541	0.291236	Respiratory system	0.472275
X1	Pancreas	29320	267	1.06186	0.060024	0.94962	1.18737	0.057	1.05306	0.292312	Cancer	0.472423
H0	boneSub	10404	712	1.04009	0.039312	0.966121	1.11973	0.037643	1.04436	0.296319	Eye disorders	0.477293
C6	boneSub	14291	55	0.865935	-0.14395	0.660534	1.13521	0.138146	-1.04198	0.297419	Leukaemia	0.477462
I5	Pancreas	28858	212	1.06863	0.066375	0.941547	1.21286	0.064596	1.02754	0.304167	Stroke	0.4853
L0	liver	16403	565	0.95566	-0.04535	0.876439	1.04204	0.044152	-1.02721	0.304324	Skin disorders	0.4853
C6	heart	23120	95	0.903406	-0.10158	0.740982	1.10143	0.101122	-1.00457	0.315106	Leukaemia	0.49475
E1	heart	22153	210	1.06944	0.067136	0.937701	1.21969	0.067073	1.00094	0.316854	Diabetes	0.49475
H0	heart	17155	1211	1.03037	0.029914	0.971913	1.09233	0.029798	1.0039	0.315428	Eye disorders	0.49475
J3	OCT	39658	1062	0.969305	-0.03118	0.912205	1.02998	0.030977	-1.00641	0.314217	Asthma	0.49475
J3	liver	23503	140	1.08896	0.085222	0.921862	1.28635	0.084992	1.00271	0.316003	Asthma	0.49475
K1	kidney	34412	364	1.0557	0.0542	0.948838	1.17459	0.054449	0.995432	0.319526	Inflammatory bowel disease	0.49475
M1	Pancreas	26371	630	1.0391	0.038351	0.963582	1.12053	0.038495	0.996259	0.319124	Rheumatoid arthritis disorders	0.49475
M4	OCT	36236	5278	1.01402	0.013926	0.98662	1.04219	0.013978	0.996317	0.319096	Soft tissue disorders	0.49475
N0	boneSub	7768	650	1.03968	0.038914	0.963235	1.12219	0.038966	0.998668	0.317956	Genitourinary system disorders	0.49475
G2	Pancreas	29068	49	1.14127	0.132142	0.87814	1.48325	0.133722	0.988178	0.323066	Epilepsy	0.498622
L0	meanOverall	27883	1145	1.02308	0.0228175	0.965273	1.08435	0.0296748	0.768917	0.441942	Skin disorders	0.500312
K3	OCT	44661	234	0.938723	-0.06323	0.827197	1.06529	0.064531	-0.97991	0.327131	Pancreatitis	0.503278
I6	boneSub	14104	203	1.06997	0.067634	0.932673	1.22749	0.07007	0.965237	0.334426	Cerebrovascular diseases	0.512858
G4	Brain_GM	40807	212	1.06758	0.065395	0.934044	1.22021	0.068178	0.959175	0.33747	Sleep disorders	0.515878
F4	kidney	31445	338	1.05221	0.050891	0.943759	1.17312	0.055498	0.916977	0.359155	Mood disorders	0.547283
K3	Brain_GM	41863	71	1.11283	0.106902	0.883696	1.40136	0.117627	0.908826	0.363442	Pancreatitis	0.552064
K2	liver	26728	281	1.0558	0.054299	0.93878	1.18741	0.059937	0.905944	0.364966	Liver diseases	0.552629
L1	heart	17943	298	1.05304	0.05168	0.941352	1.17798	0.057204	0.903434	0.366296	Infections and excema	0.552899
J3	meanOverall	39653	282	1.04076	0.0399537	0.92644	1.16919	0.059368	0.672983	0.500958	Asthma	0.55662
M1	Brain_WM	35908	949	1.03259	0.032066	0.962475	1.1078	0.035874	0.893836	0.37141	Rheumatoid arthritis disorders	0.558861
A2	liver	18410	69	0.890898	-0.11553	0.690121	1.15009	0.13029	-0.88668	0.375251	Viral infections	0.561406
I7	kidney	35108	389	0.958691	-0.04219	0.873301	1.05243	0.047597	-0.88633	0.37544	Peripheral artery diseases	0.561406
A2	Pancreas	20092	89	1.09694	0.092526	0.893199	1.34716	0.104835	0.882592	0.377457	Viral infections	0.562669
A2	meanOverall	32845	190	1.04832	0.0471923	0.90655	1.21227	0.074135	0.636573	0.524403	Viral infections	0.572076
A2	kidney	25567	147	1.07663	0.073835	0.909469	1.27451	0.086088	0.857667	0.391076	Viral infections	0.581166
C6	Brain_GM	41760	132	0.928329	-0.07437	0.782642	1.10113	0.087099	-0.85385	0.393191	Leukaemia	0.581415
L1	kidney	27892	418	0.961194	-0.03958	0.877636	1.05271	0.046401	-0.85299	0.393666	Infections and excema	0.581415
C0	Brain_WM	35083	1760	1.02186	0.021627	0.971292	1.07506	0.025896	0.835135	0.403641	Cancer	0.588899
C5	liver	26703	204	1.05983	0.058105	0.925394	1.21379	0.069206	0.839595	0.401136	Prostate cancer	0.588899
K0	Brain_WM	18498	2767	1.01821	0.018046	0.97603	1.06221	0.021586	0.836011	0.403149	Digestive system disorders	0.588899
K3	Brain_WM	39676	65	1.12577	0.118465	0.853022	1.48572	0.141551	0.836906	0.402646	Pancreatitis	0.588899
E1	liver	25760	210	1.05856	0.056909	0.925779	1.21039	0.068383	0.832209	0.405291	Diabetes	0.589514
C2	heart	23223	44	1.13654	0.12799	0.83964	1.53843	0.154478	0.828528	0.407371	Lung cancer	0.59075
A0	kidney	22190	758	0.971427	-0.02899	0.906859	1.04059	0.035092	-0.8261	0.408748	Diseases of Infections	0.590961
J3	boneSub	12408	84	1.09249	0.088456	0.88478	1.34895	0.10759	0.822159	0.410986	Asthma	0.592413
C5	Brain_WM	39062	326	1.0504	0.049175	0.933914	1.18142	0.059973	0.819945	0.412247	Prostate cancer	0.592451
G3	Brain_GM	41431	140	1.06876	0.066499	0.907095	1.25924	0.083679	0.79469	0.426794	Transient ischemic attack	0.611525
M4	liver	19456	527	1.03555	0.034933	0.949234	1.12972	0.044405	0.786692	0.431462	Soft tissue disorders	0.616375
A1	kidney	32282	813	0.974612	-0.02572	0.91303	1.04035	0.033302	-0.77218	0.440006	Bacterial infections	0.623017
C5	OCT	44526	1094	1.02402	0.023738	0.964183	1.08757	0.030721	0.772697	0.439702	Prostate cancer	0.623017
X1	boneSub	14372	154	1.06391	0.061955	0.909665	1.24432	0.079917	0.775246	0.438195	Cancer	0.623017
C0	liver	24000	1057	0.975545	-0.02476	0.91572	1.03928	0.03229	-0.76677	0.443217	Cancer	0.625276
M1	kidney	32520	901	0.975132	-0.02518	0.914214	1.04011	0.032913	-0.76511	0.444207	Rheumatoid arthritis disorders	0.625276
H2	Pancreas	28445	190	1.0541	0.052685	0.919098	1.20893	0.069924	0.753467	0.45117	Glaucoma	0.631374
L1	Brain_WM	30966	430	1.04256	0.041679	0.93564	1.1617	0.055207	0.754958	0.450274	Infections and excema	0.631374
C0	Pancreas	25920	1216	1.02062	0.020413	0.966125	1.07819	0.027998	0.729092	0.465945	Cancer	0.649453
F2	liver	25596	205	0.950551	-0.05071	0.828471	1.09062	0.070134	-0.72308	0.469629	Substance abuse	0.649453
G0	liver	21172	677	0.971565	-0.02885	0.898678	1.05036	0.039788	-0.72502	0.468443	Nervous system disorders	0.649453
I6	Pancreas	28759	370	1.03638	0.035736	0.94045	1.1421	0.049558	0.721091	0.470854	Cerebrovascular diseases	0.649453
K3	boneSub	14329	25	0.864735	-0.14533	0.584255	1.27986	0.200047	-0.72649	0.467539	Pancreatitis	0.649453
I2	Pancreas	27602	662	1.02628	0.025937	0.955871	1.10187	0.036261	0.715299	0.474424	Ischemic heart diseases	0.652503
M3	meanOverall	43241	379	1.02587	0.0255428	0.927226	1.13501	0.0515828	0.495181	0.620472	Sciatica	0.664792
I1	liver	19412	832	0.9759	-0.02439	0.911168	1.04523	0.035018	-0.69664	0.486027	Hypertension	0.665118
L0	heart	13913	642	0.972748	-0.02763	0.899939	1.05145	0.039694	-0.6961	0.486367	Skin disorders	0.665118
C5	Pancreas	28789	242	1.04126	0.040432	0.928557	1.16765	0.058448	0.691765	0.489085	Prostate cancer	0.666934
M2	Pancreas	24342	1122	1.02012	0.019923	0.963698	1.07985	0.029031	0.686273	0.492541	Osteoarthritis	0.669744
H3	OCT	38977	3269	1.01189	0.011825	0.977318	1.0477	0.017739	0.666602	0.505026	Ear disorders	0.684781
M4	heart	16591	612	0.973935	-0.02641	0.900089	1.05384	0.040231	-0.65649	0.511511	Soft tissue disorders	0.691621
C3	liver	25529	526	0.970291	-0.03016	0.886037	1.06256	0.046347	-0.65072	0.515227	Melanoma	0.694319
J0	kidney	17951	956	1.02084	0.020624	0.959188	1.08645	0.031782	0.648906	0.516399	Respiratory system disorders	0.694319
F3	Brain_WM	39766	21	1.17287	0.159454	0.719496	1.91193	0.24932	0.639554	0.522463	Pyschotic disorders	0.69894
H3	Pancreas	23338	389	1.03154	0.031048	0.937848	1.13458	0.04858	0.639114	0.522749	Ear disorders	0.69894
G3	liver	26808	78	0.927025	-0.07577	0.733188	1.17211	0.119685	-0.63312	0.526656	Transient ischemic attack	0.702208
C4	meanOverall	44817	229	1.03034	0.0298848	0.894989	1.18615	0.0718529	0.415917	0.677471	Breast cancer	0.713127
C4	Brain_WM	38846	198	1.05212	0.050807	0.8951	1.23668	0.082464	0.616106	0.537824	Breast cancer	0.713137
I6	kidney	35296	524	1.02703	0.026672	0.943566	1.11788	0.043246	0.616746	0.537402	Cerebrovascular diseases	0.713137
K3	liver	27103	40	0.907008	-0.0976	0.662815	1.24117	0.160031	-0.60991	0.541921	Pancreatitis	0.71659
A2	Brain_GM	30007	172	0.954227	-0.04685	0.819404	1.11123	0.077718	-0.60287	0.546596	Viral infections	0.718812
F3	kidney	35917	21	1.1474	0.137495	0.733906	1.79385	0.227998	0.603052	0.546474	Pyschotic disorders	0.718812
A0	liver	15888	413	0.970348	-0.0301	0.878268	1.07208	0.05087	-0.59171	0.554046	Diseases of Infections	0.724345
G4	kidney	34947	184	0.962381	-0.03834	0.847957	1.09224	0.064583	-0.59373	0.552692	Sleep disorders	0.724345
L1	liver	21077	236	0.961172	-0.0396	0.84265	1.09637	0.067145	-0.58979	0.555331	Infections and excema	0.724345
K0	kidney	16796	2671	1.01123	0.011168	0.97405	1.04983	0.019113	0.584314	0.559009	Digestive system disorders	0.727166
C2	boneSub	14366	31	1.10856	0.103064	0.781325	1.57285	0.178487	0.577433	0.563647	Lung cancer	0.731218
A1	liver	24209	506	0.97472	-0.02561	0.891874	1.06526	0.04532	-0.565	0.572077	Bacterial infections	0.734216
F0	liver	20780	555	0.975756	-0.02454	0.896329	1.06222	0.043319	-0.56656	0.57101	Mental and behavioural disorders	0.734216
F3	liver	27166	13	1.16999	0.156995	0.681072	2.00989	0.276068	0.568683	0.569571	Pyschotic disorders	0.734216
G3	OCT	44474	508	1.02609	0.025754	0.939352	1.12084	0.045062	0.571538	0.567635	Transient ischemic attack	0.734216
C3	Brain_WM	37353	865	1.0207	0.02049	0.949448	1.0973	0.036921	0.554958	0.578924	Melanoma	0.741022
E1	OCT	42816	1700	1.01372	0.01363	0.965744	1.06409	0.024739	0.550969	0.581655	Diabetes	0.742538
G4	liver	26410	107	1.05168	0.050392	0.878	1.25972	0.092093	0.547179	0.584256	Sleep disorders	0.74388
H1	liver	24745	1148	1.01712	0.016972	0.956474	1.0816	0.031365	0.541106	0.588434	Cataracts	0.745247
K0	boneSub	6691	1080	1.01666	0.016528	0.957786	1.07916	0.030439	0.542994	0.587134	Digestive system disorders	0.745247
G2	Brain_GM	41661	65	1.06817	0.065943	0.839672	1.35884	0.122802	0.53699	0.591275	Epilepsy	0.746873
J3	heart	20087	158	0.958578	-0.0423	0.820776	1.11952	0.079185	-0.53425	0.59317	Asthma	0.747301
A1	heart	20933	552	1.02284	0.022579	0.940716	1.11213	0.042701	0.528768	0.596966	Bacterial infections	0.750115
A2	OCT	39593	1499	1.01375	0.013661	0.96293	1.06726	0.026243	0.520541	0.602686	Viral infections	0.751401
F1	kidney	35930	156	1.04227	0.041402	0.89253	1.21713	0.079133	0.523199	0.600836	Dementia	0.751401
H2	boneSub	13910	114	1.05002	0.048812	0.87383	1.26174	0.093717	0.520844	0.602475	Glaucoma	0.751401
G3	boneSub	14146	50	0.928538	-0.07414	0.701411	1.22921	0.143124	-0.51804	0.604431	Transient ischemic attack	0.751624
C2	Pancreas	29308	45	1.07472	0.072058	0.814943	1.4173	0.141173	0.51042	0.609757	Lung cancer	0.756288
C1	boneSub	14350	49	1.07214	0.069659	0.818181	1.40493	0.137926	0.505042	0.613529	Colorectal cancer	0.759005
F1	liver	27177	75	1.06207	0.060223	0.838915	1.34459	0.120343	0.500423	0.616778	Dementia	0.759111
F3	Pancreas	29277	15	0.874999	-0.13353	0.519259	1.47445	0.266239	-0.50155	0.615982	Pyschotic disorders	0.759111
C1	OCT	44610	538	1.02216	0.021922	0.93762	1.11433	0.044048	0.49768	0.618709	Colorectal cancer	0.759541
G2	kidney	35651	59	0.941868	-0.05989	0.740847	1.19743	0.122487	-0.48895	0.624879	Epilepsy	0.765158
F2	kidney	33851	352	0.97603	-0.02426	0.882634	1.07931	0.051318	-0.47278	0.636369	Substance abuse	0.76748
H1	boneSub	13097	706	1.01831	0.018142	0.945094	1.09719	0.038068	0.476562	0.633674	Cataracts	0.76748
F3	boneSub	14347	10	1.15409	0.143312	0.639645	2.08228	0.301104	0.475955	0.634106	Pyschotic disorders	0.76748
M0	heart	9916	1145	1.01443	0.01433	0.956474	1.0759	0.030017	0.477401	0.633077	Musculoskeletal system disorders	0.76748
M3	Pancreas	27582	208	1.03284	0.032311	0.903724	1.1804	0.068135	0.474218	0.635344	Sciatica	0.76748
M3	Brain_GM	39560	336	0.974051	-0.02629	0.874148	1.08537	0.055212	-0.47619	0.633941	Sciatica	0.76748
N0	liver	14851	980	1.0151	0.014983	0.952216	1.08213	0.032626	0.459228	0.646071	Genitourinary system disorders	0.777228
H0	liver	19924	1115	0.985659	-0.01444	0.92635	1.04876	0.031663	-0.4562	0.648245	Eye disorders	0.777894
L0	Brain_WM	24143	933	1.01639	0.016254	0.947316	1.09049	0.035908	0.452674	0.650784	Skin disorders	0.778993
A2	heart	16718	112	1.044	0.043061	0.864175	1.26125	0.096451	0.446451	0.655271	Viral infections	0.781409
G2	boneSub	14239	26	0.915392	-0.0884	0.620334	1.35079	0.198521	-0.44531	0.656098	Epilepsy	0.781409
X3	kidney	35966	123	1.0374	0.036722	0.881873	1.22037	0.082873	0.44311	0.657686	Circulatory system	0.781409
A2	boneSub	10268	53	1.06255	0.06067	0.807053	1.39893	0.140327	0.432346	0.66549	Viral infections	0.782929
C1	liver	27159	84	0.952896	-0.04825	0.765854	1.18562	0.111489	-0.43278	0.665177	Colorectal cancer	0.782929
J3	kidney	31060	230	1.02863	0.028224	0.905504	1.16849	0.065046	0.433903	0.664359	Asthma	0.782929
L0	kidney	21755	922	1.01437	0.014268	0.951306	1.08162	0.03275	0.435675	0.663072	Skin disorders	0.782929
C0	boneSub	12758	687	1.01623	0.016104	0.942746	1.09545	0.038298	0.420494	0.674125	Cancer	0.791149
C3	OCT	43805	2507	1.00844	0.008403	0.969376	1.04907	0.020156	0.416876	0.676769	Melanoma	0.792315
I6	liver	26700	339	0.978168	-0.02207	0.875631	1.09271	0.056499	-0.39069	0.696027	Cerebrovascular diseases	0.812878
M1	boneSub	12826	359	0.980029	-0.02017	0.883361	1.08727	0.052985	-0.38073	0.7034	Rheumatoid arthritis disorders	0.819495
C4	OCT	44043	849	1.0132	0.013111	0.945927	1.08525	0.035052	0.374048	0.708369	Breast cancer	0.823285
E0	kidney	23700	2062	0.992381	-0.00765	0.952198	1.03426	0.021089	-0.36263	0.71688	Endocrine disorders	0.830569
F5	boneSub	12586	197	1.02646	0.026119	0.890756	1.18284	0.07235	0.361004	0.718096	Neurotic disorders	0.830569
G1	heart	23189	38	0.946403	-0.05509	0.687326	1.30313	0.163196	-0.33755	0.735701	Parkinson disease	0.840801
H2	kidney	34907	241	0.978777	-0.02145	0.865194	1.10727	0.062935	-0.34085	0.733215	Glaucoma	0.840801
I5	liver	26790	198	0.9752	-0.02511	0.843457	1.12752	0.074049	-0.33913	0.734508	Stroke	0.840801
J2	liver	25983	198	1.02534	0.02502	0.887598	1.18445	0.073602	0.339939	0.733902	Chronic obstructive pulmonary disease	0.840801
M1	heart	21143	636	1.01418	0.014076	0.936075	1.09879	0.040886	0.344263	0.730649	Rheumatoid arthritis disorders	0.840801
C1	kidney	35914	132	0.973007	-0.02736	0.827821	1.14366	0.082447	-0.3319	0.739962	Colorectal cancer	0.843663
C4	liver	26559	113	0.965636	-0.03497	0.783577	1.18999	0.106593	-0.32805	0.742871	Breast cancer	0.844525
X0	heart	23237	455	1.01584	0.015717	0.924312	1.11644	0.048176	0.326247	0.744237	All-cause mortality	0.844525
G4	Brain_WM	38676	198	1.02536	0.025045	0.879129	1.19592	0.078506	0.319022	0.74971	Sleep disorders	0.848729
C3	boneSub	13522	326	1.0173	0.017148	0.911344	1.13557	0.056115	0.305594	0.759914	Melanoma	0.858255
G2	heart	23026	43	0.955399	-0.04563	0.710169	1.28531	0.151342	-0.30148	0.763051	Epilepsy	0.859776
J3	Brain_WM	34388	237	1.0207	0.020491	0.887328	1.17412	0.071446	0.2868	0.774265	Asthma	0.870369
D0	heart	21271	737	1.01049	0.010436	0.938635	1.08785	0.037636	0.277283	0.781563	Blood and immune disorders	0.870418
F0	kidney	27391	896	0.990894	-0.00915	0.928973	1.05694	0.032923	-0.27785	0.781131	Mental and behavioural disorders	0.870418
I0	liver	15037	1287	1.0081	0.008064	0.953575	1.06574	0.028368	0.284264	0.776208	Circulatory system disorders	0.870418
X1	liver	27201	217	0.980552	-0.01964	0.854648	1.125	0.070117	-0.2801	0.779403	Cancer	0.870418
C1	Pancreas	29278	93	0.973404	-0.02696	0.80269	1.18042	0.098385	-0.27399	0.784095	Colorectal cancer	0.871216
I3	kidney	34016	981	1.00802	0.007985	0.949873	1.06972	0.030312	0.263415	0.79223	Arrhythmias	0.878223
G3	Pancreas	28890	94	1.02647	0.026128	0.84361	1.24897	0.100101	0.26102	0.794077	Transient ischemic attack	0.878242
C4	boneSub	14061	72	0.971087	-0.02934	0.754631	1.24963	0.128669	-0.22802	0.819631	Breast cancer	0.886324
F5	kidney	32065	531	0.989492	-0.01056	0.908033	1.07826	0.043833	-0.24099	0.80956	Neurotic disorders	0.886324
H1	kidney	32761	1663	1.00602	0.006004	0.958782	1.05559	0.024539	0.244667	0.806714	Cataracts	0.886324
I4	kidney	35751	358	1.01219	0.012119	0.919651	1.11405	0.048919	0.247741	0.804335	Heart failure	0.886324
J1	liver	25607	342	0.98715	-0.01293	0.887025	1.09858	0.054567	-0.23701	0.812651	Influenza and Pneumonia	0.886324
J3	Pancreas	25325	156	1.01849	0.018325	0.8753	1.18511	0.077304	0.237048	0.81262	Asthma	0.886324
M0	liver	11483	987	0.992317	-0.00771	0.93004	1.05876	0.033069	-0.23323	0.815584	Musculoskeletal system disorders	0.886324
M2	OCT	39917	5713	1.00306	0.003058	0.977008	1.02981	0.013428	0.227738	0.81985	Osteoarthritis	0.886324
M3	heart	21897	206	1.01694	0.016797	0.88504	1.16849	0.070878	0.236982	0.812671	Sciatica	0.886324
X2	Pancreas	29320	20	0.947997	-0.0534	0.603632	1.48882	0.230304	-0.23189	0.816626	Nervous system	0.886324
F2	Pancreas	27559	241	0.986147	-0.01395	0.870252	1.11748	0.063789	-0.21868	0.826899	Substance abuse	0.891546
G1	OCT	44755	277	0.987002	-0.01308	0.876885	1.11095	0.060357	-0.21676	0.828395	Parkinson disease	0.891546
H3	heart	18383	394	0.989149	-0.01091	0.893691	1.0948	0.051779	-0.21072	0.833109	Ear disorders	0.894614
H2	heart	22602	177	1.01412	0.014022	0.871515	1.18006	0.07732	0.181353	0.85609	Glaucoma	0.915525
H2	liver	26404	175	1.01442	0.014319	0.868691	1.1846	0.079128	0.180962	0.856398	Glaucoma	0.915525
F3	OCT	44716	80	0.980884	-0.0193	0.78542	1.22499	0.113387	-0.17022	0.864836	Pyschotic disorders	0.921422
L0	OCT	33371	5566	0.997721	-0.00228	0.971672	1.02447	0.013498	-0.16906	0.865753	Skin disorders	0.921422
C6	Pancreas	29126	82	0.982161	-0.018	0.793406	1.21582	0.10889	-0.1653	0.868704	Leukaemia	0.922518
C6	Brain_WM	39582	118	0.986775	-0.01331	0.836715	1.16375	0.084164	-0.15818	0.874317	Leukaemia	0.926429
C4	Pancreas	28648	126	0.98491	-0.0152	0.810098	1.19745	0.099693	-0.15252	0.87878	Breast cancer	0.927064
F5	OCT	41891	2359	0.996797	-0.00321	0.956733	1.03854	0.020931	-0.15326	0.878196	Neurotic disorders	0.927064
H3	liver	21751	336	0.991885	-0.00815	0.887268	1.10884	0.056869	-0.14328	0.886068	Ear disorders	0.92863
I5	kidney	35421	307	0.991957	-0.00808	0.889438	1.10629	0.055659	-0.14509	0.884636	Stroke	0.92863
K1	liver	26025	234	0.990073	-0.00998	0.864567	1.1338	0.06916	-0.14425	0.885302	Inflammatory bowel disease	0.92863
C3	Brain_GM	39420	940	1.00448	0.004465	0.942448	1.07058	0.032521	0.137304	0.890791	Melanoma	0.929521
I3	liver	25674	639	1.00564	0.005619	0.929363	1.08817	0.040243	0.139633	0.88895	Arrhythmias	0.929521
J2	kidney	34270	333	0.992871	-0.00715	0.894613	1.10192	0.053169	-0.13457	0.892956	Chronic obstructive pulmonary disease	0.929759
F5	liver	24227	333	1.00734	0.007318	0.900551	1.1268	0.057178	0.127987	0.89816	Neurotic disorders	0.933153
C3	Pancreas	27547	588	0.995209	-0.0048	0.91813	1.07876	0.04113	-0.11677	0.907042	Melanoma	0.938319
M3	kidney	33886	303	1.00671	0.006692	0.899874	1.12624	0.057242	0.116906	0.906935	Sciatica	0.938319
K2	kidney	35370	451	1.00497	0.004957	0.919429	1.09847	0.045388	0.109207	0.913038	Liver diseases	0.942491
G1	kidney	35885	59	0.987621	-0.01246	0.779868	1.25072	0.120499	-0.10337	0.917667	Parkinson disease	0.945066
K1	heart	22230	256	1.0064	0.006381	0.889306	1.13891	0.06311	0.101101	0.91947	Inflammatory bowel disease	0.945066
C0	heart	20616	1253	1.0025	0.002495	0.948004	1.06012	0.028516	0.087492	0.930281	Cancer	0.954134
A2	Brain_WM	28273	152	1.00732	0.007291	0.850713	1.19275	0.086211	0.084571	0.932602	Viral infections	0.954476
C1	heart	23200	100	1.00774	0.007712	0.826345	1.22896	0.101255	0.076167	0.939286	Colorectal cancer	0.959271
J0	heart	11594	632	1.00297	0.002968	0.926509	1.08575	0.04046	0.073347	0.94153	Respiratory system disorders	0.959521
C5	kidney	35329	327	0.997518	-0.00249	0.905094	1.09938	0.049608	-0.0501	0.96004	Prostate cancer	0.969615
G1	liver	27137	35	0.99095	-0.00909	0.710921	1.38128	0.169443	-0.05365	0.957212	Parkinson disease	0.969615
L1	boneSub	10973	155	1.00422	0.00421	0.858608	1.17453	0.079927	0.052677	0.95799	Infections and excema	0.969615
M3	Brain_WM	37488	309	1.00282	0.002816	0.894391	1.12439	0.058382	0.048228	0.961534	Sciatica	0.969615
X2	kidney	35966	31	1.00913	0.009087	0.707682	1.43898	0.181048	0.050192	0.959969	Nervous system	0.969615
C5	Brain_GM	41212	349	1.00144	0.001442	0.904328	1.10899	0.052044	0.027716	0.977889	Prostate cancer	0.984039
I7	Pancreas	28598	299	0.998737	-0.00126	0.894743	1.11482	0.056101	-0.02252	0.98203	Peripheral artery diseases	0.986139
F3	heart	23206	19	1.00317	0.003163	0.642466	1.56638	0.227353	0.013913	0.988899	Pyschotic disorders	0.990964
N1	liver	26527	508	0.999788	-0.00021	0.915173	1.09223	0.045118	-0.00471	0.996244	Renal failure	0.996244
C3	meanOverall	43048	1034	1.00136	0.00136071	0.942084	1.06437	0.031134	0.0437049	0.96514	Melanoma	0.997516
G2	meanOverall	45517	75	0.999643	-0.000357556	0.798177	1.25196	0.114832	-0.00311372	0.997516	Epilepsy	0.997516
K3	meanOverall	45749	80	1.00246	0.00246152	0.803758	1.2503	0.112716	0.0218383	0.982577	Pancreatitis	0.997516

## Sheet: Table8-Survival_sensitivity
The summary of statistics of survival analysis, without regressing age and imaging site from age gap
Target	Organ	Number of All	Number of target	HR	Beta	95% CI (lower)	95% CI (upper)	SE	Z	P	Disease	FDR
F1	Brain_GM	41966	162	1.76896	0.570391	1.65745	1.88797	0.0332205	17.1698	4.47e-66	Dementia	2.14e-63
F1	meanOverall	45866	195	1.58691	0.461786	1.46119	1.72344	0.0421096	10.9663	5.55e-28	Dementia	3.33e-26
X0	Brain_GM	42012	746	1.37309	0.317065	1.2878	1.46404	0.0327205	9.69011	3.32e-22	All-cause mortality	7.97e-20
N1	meanOverall	44778	1098	1.24022	0.215289	1.17786	1.30589	0.0263233	8.17862	2.87e-16	Renal failure	8.61e-15
I1	heart	16784	889	1.29889	0.261508	1.21553	1.38796	0.0338411	7.72752	1.1e-14	Hypertension	1.32e-12
X2	Brain_GM	42012	33	1.86183	0.62156	1.5911	2.17862	0.0801718	7.75284	8.99e-15	Nervous system	1.32e-12
I6	Brain_WM	39132	520	1.44195	0.365997	1.31305	1.58351	0.0477791	7.66019	1.86e-14	Cerebrovascular diseases	1.78e-12
F0	meanOverall	35067	1130	1.21962	0.198542	1.1573	1.28531	0.0267639	7.41827	1.19e-13	Mental and behavioural disorders	2.37e-12
F1	Brain_WM	39783	135	1.93868	0.662005	1.62837	2.30811	0.0889937	7.43879	1.02e-13	Dementia	8.13e-12
F0	Brain_GM	32083	999	1.24127	0.216136	1.17216	1.31445	0.0292268	7.39511	1.41e-13	Mental and behavioural disorders	9.69e-12
X0	meanOverall	45918	856	1.22893	0.206143	1.15919	1.30286	0.0298078	6.91575	4.65e-12	All-cause mortality	6.98e-11
I1	meanOverall	32282	1606	1.17469	0.161006	1.12202	1.22983	0.0234048	6.87918	6.02e-12	Hypertension	7.22e-11
I0	meanOverall	25046	2427	1.14221	0.132965	1.09908	1.18703	0.0196376	6.77093	1.28e-11	Circulatory system disorders	1.28e-10
I0	heart	13232	1407	1.20823	0.189155	1.14585	1.27401	0.0270469	6.99357	2.68e-12	Circulatory system disorders	1.61e-10
I6	meanOverall	45030	645	1.24705	0.220785	1.16374	1.33634	0.0352801	6.25806	3.9e-10	Cerebrovascular diseases	3.34e-09
F0	Brain_WM	30424	892	1.23639	0.212199	1.15681	1.32146	0.0339472	6.25086	4.08e-10	Mental and behavioural disorders	1.96e-08
X0	OCT	44823	2833	1.12763	0.120121	1.08595	1.17091	0.019216	6.25112	4.08e-10	All-cause mortality	1.96e-08
I6	Brain_GM	41274	567	1.26994	0.238969	1.17697	1.37026	0.0387907	6.16048	7.25e-10	Cerebrovascular diseases	3.16e-08
I1	Brain_GM	29805	1446	1.16434	0.152157	1.10875	1.22273	0.0249629	6.09534	1.09e-09	Hypertension	4.37e-08
X0	Brain_WM	39823	681	1.27851	0.245699	1.17832	1.38723	0.0416396	5.90061	3.62e-09	All-cause mortality	1.34e-07
G0	Brain_WM	31118	1110	1.22304	0.20134	1.1425	1.30926	0.0347572	5.79274	6.92e-09	Nervous system disorders	2.37e-07
F4	meanOverall	40222	421	1.26388	0.234186	1.16265	1.37393	0.0425967	5.49775	3.85e-08	Mood disorders	2.52e-07
I4	meanOverall	45614	471	1.24685	0.220623	1.15288	1.34849	0.0399811	5.51819	3.43e-08	Heart failure	2.52e-07
J1	meanOverall	43129	785	1.19301	0.176476	1.12006	1.2707	0.0321908	5.4822	4.2e-08	Influenza and Pneumonia	2.52e-07
I1	Brain_WM	28321	1331	1.17279	0.159387	1.11097	1.23806	0.0276318	5.76824	8.01e-09	Hypertension	2.56e-07
I0	Brain_GM	23193	2207	1.12509	0.117863	1.07978	1.1723	0.0209711	5.62025	1.91e-08	Circulatory system disorders	5.72e-07
G0	Brain_GM	32855	1224	1.16544	0.1531	1.10453	1.22972	0.0273895	5.58974	2.27e-08	Nervous system disorders	6.42e-07
I3	meanOverall	43328	1234	1.14521	0.13559	1.08728	1.20624	0.026488	5.11893	3.07e-07	Arrhythmias	1.68e-06
G0	meanOverall	35870	1369	1.13847	0.129683	1.08223	1.19762	0.0258454	5.01765	5.23e-07	Nervous system disorders	2.62e-06
I5	Brain_WM	39261	298	1.40099	0.337178	1.23732	1.58631	0.063384	5.31961	1.04e-07	Stroke	2.77e-06
E0	meanOverall	30039	2605	1.09876	0.0941797	1.05874	1.14028	0.018928	4.97569	6.5e-07	Endocrine disorders	3e-06
N1	Brain_GM	40997	966	1.17408	0.160481	1.10585	1.24651	0.0305454	5.25385	1.49e-07	Renal failure	3.76e-06
J1	Brain_GM	39484	696	1.20499	0.186474	1.12196	1.29417	0.0364262	5.11921	3.07e-07	Influenza and Pneumonia	7.36e-06
I3	heart	22092	641	1.22307	0.201363	1.13115	1.32246	0.0398621	5.05148	4.38e-07	Arrhythmias	1e-05
F2	Brain_GM	39528	407	1.26352	0.233899	1.15282	1.38484	0.0467795	5.00004	5.73e-07	Substance abuse	1.25e-05
J2	OCT	43340	1817	1.12749	0.119995	1.07558	1.18191	0.0240484	4.98971	6.05e-07	Chronic obstructive pulmonary disease	1.26e-05
N1	kidney	35152	840	1.1782	0.163988	1.10388	1.25752	0.0332436	4.93293	8.1e-07	Renal failure	1.62e-05
J0	Brain_GM	21039	1081	1.15528	0.14434	1.08983	1.22466	0.0297557	4.85084	1.23e-06	Respiratory system disorders	2.36e-05
H1	meanOverall	41603	2106	1.10043	0.095701	1.05577	1.14698	0.0211379	4.52745	5.97e-06	Cataracts	2.39e-05
N0	meanOverall	25233	1946	1.10306	0.0980872	1.05731	1.15079	0.0216128	4.5384	5.67e-06	Genitourinary system disorders	2.39e-05
D0	Brain_GM	38403	1187	1.14706	0.137205	1.08499	1.21269	0.0283847	4.83377	1.34e-06	Blood and immune disorders	2.47e-05
F2	meanOverall	43185	456	1.20713	0.188244	1.11167	1.31078	0.0420302	4.47878	7.51e-06	Substance abuse	2.82e-05
N1	OCT	44093	2936	1.09445	0.090254	1.05474	1.13566	0.0188568	4.78628	1.7e-06	Renal failure	3.02e-05
H2	OCT	44689	891	1.16901	0.15616	1.09644	1.24639	0.0327008	4.77542	1.79e-06	Glaucoma	3.07e-05
D1	Brain_GM	39224	990	1.15841	0.147047	1.09008	1.23102	0.0310189	4.74055	2.13e-06	Anemia	3.53e-05
X2	meanOverall	45918	39	1.57895	0.456761	1.28604	1.93858	0.104694	4.36281	1.28e-05	Nervous system	4.53e-05
E0	Brain_WM	26285	2157	1.11872	0.112185	1.06713	1.1728	0.0240881	4.65729	3.2e-06	Endocrine disorders	5.13e-05
H0	meanOverall	33522	2157	1.09467	0.0904506	1.0506	1.14058	0.0209639	4.31459	1.6e-05	Eye disorders	5.33e-05
X3	Brain_GM	42012	148	1.39285	0.331352	1.21086	1.6022	0.0714419	4.63806	3.52e-06	Circulatory system	5.45e-05
I5	Brain_GM	41410	328	1.26367	0.234021	1.14408	1.39576	0.0507235	4.61365	3.96e-06	Stroke	5.93e-05
X3	meanOverall	45918	170	1.2904	0.254952	1.14547	1.45367	0.0607866	4.19421	2.74e-05	Circulatory system	8.65e-05
X1	Brain_GM	42012	413	1.23404	0.21029	1.12587	1.3526	0.0468049	4.4929	7.03e-06	Cancer	0.000102196
I5	meanOverall	45187	376	1.21417	0.194058	1.10707	1.33162	0.0471114	4.11912	3.8e-05	Stroke	0.000114097
X2	Brain_WM	39823	28	2.36779	0.861955	1.61893	3.46303	0.193978	4.44358	8.85e-06	Nervous system	0.000124906
I4	Brain_GM	41752	421	1.22223	0.200676	1.11749	1.33679	0.0457114	4.39006	1.13e-05	Heart failure	0.000155409
H0	Brain_GM	30728	1926	1.10263	0.0976964	1.05538	1.152	0.0223472	4.37175	1.23e-05	Eye disorders	0.00016434
F0	OCT	36700	4643	1.06722	0.0650554	1.0363	1.09906	0.0150007	4.33683	1.45e-05	Mental and behavioural disorders	0.000187531
N1	Pancreas	28613	625	1.16124	0.149485	1.08417	1.24378	0.0350359	4.26662	1.98e-05	Renal failure	0.000250681
G1	Brain_GM	41922	58	1.51323	0.414244	1.24616	1.83753	0.0990716	4.18126	2.9e-05	Parkinson disease	0.000356801
J2	meanOverall	43627	423	1.18471	0.169495	1.08578	1.29265	0.044491	3.80965	0.000139162	Chronic obstructive pulmonary disease	0.000397606
D1	meanOverall	42890	1116	1.11474	0.108622	1.05372	1.1793	0.028725	3.78145	0.000155915	Anemia	0.000406736
J0	meanOverall	22995	1219	1.10812	0.102661	1.05083	1.16852	0.0270823	3.79069	0.00015023	Respiratory system disorders	0.000406736
N1	Brain_WM	38849	863	1.16614	0.153697	1.08366	1.25489	0.0374248	4.10683	4.01e-05	Renal failure	0.000481354
D0	Brain_WM	36381	1081	1.14924	0.139098	1.07483	1.2288	0.0341537	4.07271	4.65e-05	Blood and immune disorders	0.000531074
E0	Brain_GM	27677	2342	1.08596	0.0824653	1.04372	1.12991	0.0202421	4.07394	4.62e-05	Endocrine disorders	0.000531074
I7	heart	22677	263	1.28475	0.250561	1.13856	1.4497	0.0616312	4.06548	4.79e-05	Peripheral artery diseases	0.000535063
I0	Brain_WM	22019	2039	1.09595	0.0916178	1.04825	1.14581	0.0226999	4.03604	5.44e-05	Circulatory system disorders	0.00059302
F4	Brain_WM	34893	350	1.27408	0.242224	1.13118	1.43503	0.060696	3.99077	6.59e-05	Mood disorders	0.000687231
H0	OCT	38394	6490	1.05139	0.0501166	1.02586	1.07757	0.012546	3.99464	6.48e-05	Eye disorders	0.000687231
H1	Brain_GM	38107	1864	1.09272	0.0886696	1.04512	1.14248	0.0227219	3.90239	9.52e-05	Cataracts	0.000972756
I4	Brain_WM	39573	379	1.24304	0.217558	1.11416	1.38683	0.0558482	3.89553	9.8e-05	Heart failure	0.000979856
D1	Brain_WM	37162	902	1.15546	0.1445	1.07417	1.24291	0.0372215	3.88217	0.000103527	Anemia	0.000993863
F4	OCT	40911	1680	1.10117	0.0963774	1.04888	1.15608	0.0248236	3.88249	0.000103391	Mood disorders	0.000993863
A1	Brain_GM	37713	916	1.13189	0.123885	1.06307	1.20515	0.0320021	3.87116	0.000108317	Bacterial infections	0.00101945
F2	boneSub	13454	163	1.32296	0.27987	1.14706	1.52583	0.0727913	3.84483	0.000120638	Substance abuse	0.00109257
I4	boneSub	14301	148	1.33505	0.28897	1.15226	1.54685	0.0751281	3.84636	0.000119883	Heart failure	0.00109257
I6	heart	22818	355	1.23277	0.209265	1.10778	1.37186	0.0545449	3.83656	0.000124768	Cerebrovascular diseases	0.00110905
I3	Brain_GM	39690	1098	1.11836	0.111866	1.05603	1.18437	0.0292583	3.82341	0.000131619	Arrhythmias	0.00114867
I7	boneSub	13992	171	1.31175	0.271365	1.14065	1.50853	0.0713119	3.80532	0.000141622	Peripheral artery diseases	0.0012139
X1	OCT	44823	1482	1.10572	0.100493	1.04983	1.16458	0.0264626	3.79755	0.000146134	Cancer	0.0012306
E0	heart	15666	1435	1.10517	0.0999968	1.04944	1.16386	0.0263997	3.78779	0.00015199	Endocrine disorders	0.00125785
E2	heart	22327	627	1.15342	0.142732	1.07115	1.24202	0.0377576	3.78021	0.000156696	Obesity	0.00127482
A1	meanOverall	41184	1025	1.10845	0.102966	1.04574	1.17493	0.029717	3.46489	0.000530454	Bacterial infections	0.00132614
A0	meanOverall	28504	955	1.11173	0.105919	1.04637	1.18118	0.0309159	3.42602	0.000612497	Diseases of Infections	0.00141345
K2	meanOverall	45104	557	1.14592	0.136207	1.06006	1.23874	0.0397377	3.42766	0.00060881	Liver diseases	0.00141345
A0	Brain_WM	24528	787	1.17211	0.158807	1.0785	1.27385	0.0424699	3.73929	0.000184541	Diseases of Infections	0.00147633
D0	meanOverall	41995	1339	1.09389	0.0897424	1.03863	1.1521	0.0264497	3.39294	0.000691467	Blood and immune disorders	0.00153659
N0	Brain_GM	23052	1735	1.09086	0.0869673	1.04154	1.14252	0.0236069	3.68397	0.000229629	Genitourinary system disorders	0.00180692
E1	meanOverall	43441	439	1.1553	0.144363	1.06065	1.2584	0.043613	3.3101	0.000932614	Diabetes	0.00195421
F5	meanOverall	41028	673	1.13154	0.123581	1.05139	1.2178	0.0374823	3.29704	0.000977103	Neurotic disorders	0.00195421
I2	meanOverall	43137	1162	1.0953	0.0910294	1.0377	1.1561	0.0275648	3.30237	0.000958704	Ischemic heart diseases	0.00195421
A0	Brain_GM	26070	856	1.1285	0.12089	1.05756	1.2042	0.0331251	3.64951	0.000262744	Diseases of Infections	0.00203415
G3	kidney	35447	126	1.38611	0.326499	1.16186	1.65364	0.0900428	3.62605	0.000287795	Transient ischemic attack	0.00215846
X3	OCT	44823	552	1.17031	0.157265	1.07501	1.27405	0.0433357	3.62899	0.000284536	Circulatory system	0.00215846
M0	Brain_GM	18058	1802	1.08696	0.0833879	1.0388	1.13737	0.0231262	3.60578	0.000311216	Musculoskeletal system disorders	0.00229821
J2	Pancreas	27921	237	1.23207	0.208697	1.09846	1.38194	0.0585684	3.56331	0.00036621	Chronic obstructive pulmonary disease	0.00266335
J2	Brain_WM	37864	336	1.22977	0.206825	1.09622	1.37958	0.0586515	3.52634	0.000421339	Chronic obstructive pulmonary disease	0.00301855
I7	Brain_WM	38823	403	1.2117	0.192028	1.08851	1.34885	0.054706	3.51019	0.000447783	Peripheral artery diseases	0.00316082
C2	OCT	44802	344	1.20401	0.185658	1.08448	1.33672	0.0533482	3.48012	0.00050119	Lung cancer	0.00348654
F2	OCT	42073	2367	1.07555	0.0728321	1.03173	1.12123	0.0212211	3.43207	0.000598997	Substance abuse	0.00405179
M4	Pancreas	20906	604	1.14088	0.131796	1.05816	1.23006	0.0384031	3.43192	0.000599327	Soft tissue disorders	0.00405179
E1	Brain_WM	37812	370	1.2121	0.192353	1.08558	1.35336	0.056245	3.41991	0.00062641	Diabetes	0.00417607
J1	OCT	43154	2487	1.07305	0.0705012	1.03044	1.11741	0.0206712	3.41059	0.000648222	Influenza and Pneumonia	0.00426228
I4	OCT	44608	1319	1.10146	0.0966327	1.04186	1.16446	0.0283824	3.40467	0.00066245	Heart failure	0.00429697
E1	Pancreas	27764	244	1.20119	0.183312	1.0799	1.3361	0.0543091	3.37535	0.000737231	Diabetes	0.00468182
H0	Pancreas	21422	1306	1.09269	0.088647	1.0378	1.1505	0.0263008	3.37051	0.000750292	Eye disorders	0.00468182
I3	Brain_WM	37623	1009	1.12498	0.117761	1.05051	1.20472	0.0349415	3.37023	0.000751042	Arrhythmias	0.00468182
I7	Brain_GM	40971	444	1.16314	0.151127	1.06333	1.27232	0.0457758	3.30145	0.000961851	Peripheral artery diseases	0.00591908
I7	meanOverall	44765	515	1.13112	0.123204	1.04248	1.22729	0.0416338	2.95923	0.00308406	Peripheral artery diseases	0.00596916
M2	Brain_GM	34795	1751	1.08014	0.0770869	1.03149	1.13107	0.0235095	3.27897	0.00104188	Osteoarthritis	0.00633039
D0	OCT	42464	3955	1.05429	0.0528711	1.02138	1.08826	0.0161803	3.26761	0.00108458	Blood and immune disorders	0.00642714
J2	boneSub	13667	138	1.30263	0.264386	1.11166	1.52641	0.0808858	3.26864	0.00108067	Chronic obstructive pulmonary disease	0.00642714
E2	OCT	43797	3388	1.05901	0.0573301	1.02311	1.09616	0.0175916	3.25894	0.00111829	Obesity	0.0065461
I2	boneSub	13545	358	1.17274	0.159346	1.06426	1.29228	0.0495239	3.21755	0.00129288	Ischemic heart diseases	0.00747692
C6	liver	27028	66	0.662755	-0.411349	0.515352	0.85232	0.128347	-3.20497	0.00135078	Leukaemia	0.00771877
H0	Brain_WM	29079	1778	1.0889	0.0851646	1.03352	1.14724	0.0266287	3.19823	0.00138276	Eye disorders	0.00780854
J0	Brain_WM	19873	977	1.10998	0.104338	1.04098	1.18354	0.0327419	3.18669	0.00143911	Respiratory system disorders	0.00803224
H3	meanOverall	36783	715	1.10756	0.102162	1.03245	1.18814	0.0358306	2.85126	0.00435467	Ear disorders	0.008165
N0	Pancreas	15986	1131	1.09263	0.0885916	1.03431	1.15425	0.0279882	3.16531	0.00154916	Genitourinary system disorders	0.00854708
H1	OCT	43462	4214	1.05064	0.049396	1.01886	1.0834	0.0156683	3.15261	0.00161817	Cataracts	0.00882637
D0	boneSub	13080	443	1.15486	0.143979	1.05587	1.26313	0.0457231	3.14894	0.00163864	Blood and immune disorders	0.00883764
I2	Brain_GM	39535	1037	1.0978	0.0933112	1.0349	1.16453	0.0301051	3.09951	0.00193841	Ischemic heart diseases	0.0103382
G3	meanOverall	45251	162	1.21799	0.197202	1.05846	1.40156	0.0716267	2.75318	0.00590187	Transient ischemic attack	0.0107307
I4	heart	23200	217	1.23232	0.2089	1.07779	1.40901	0.0683639	3.0557	0.00224534	Heart failure	0.0118435
I2	heart	22347	654	1.12587	0.118555	1.0424	1.21602	0.0393014	3.01655	0.00255666	Ischemic heart diseases	0.0132005
M2	boneSub	11863	615	1.12705	0.119608	1.04278	1.21814	0.0396519	3.01644	0.0025576	Osteoarthritis	0.0132005
A1	Brain_WM	35697	841	1.12185	0.114978	1.03936	1.21088	0.0389644	2.95085	0.00316898	Bacterial infections	0.016182
M2	meanOverall	37986	1951	1.05888	0.0572105	1.01399	1.10576	0.0221034	2.58831	0.00964484	Osteoarthritis	0.0170203
X1	kidney	35966	385	0.880904	-0.126807	0.809291	0.958854	0.0432611	-2.93119	0.00337665	Cancer	0.017061
F0	boneSub	10556	359	1.16008	0.148486	1.05027	1.28136	0.0507328	2.92683	0.00342433	Mental and behavioural disorders	0.0171216
N1	boneSub	14036	323	1.16519	0.152887	1.05107	1.29171	0.0525923	2.90703	0.00364877	Renal failure	0.0180558
F2	Brain_WM	37467	356	1.18444	0.169273	1.05654	1.32783	0.0583056	2.9032	0.00369373	Substance abuse	0.0180918
I0	OCT	28402	7572	1.03427	0.0336973	1.01094	1.05814	0.0116394	2.89511	0.00379021	Circulatory system disorders	0.0182204
X4	Brain_GM	42012	43	1.45946	0.378068	1.12984	1.88524	0.130609	2.89464	0.00379591	Respiratory system	0.0182204
E1	Brain_GM	39847	396	1.14838	0.138355	1.04462	1.26245	0.0483179	2.86344	0.00419069	Diabetes	0.0199162
M0	meanOverall	19661	2002	1.05644	0.0549065	1.01234	1.10247	0.0217583	2.52347	0.0116202	Musculoskeletal system disorders	0.0199203
D1	boneSub	13388	372	1.15279	0.142189	1.04555	1.27104	0.0498221	2.85393	0.00431819	Anemia	0.0201236
D1	OCT	43095	3153	1.05312	0.0517566	1.01637	1.0912	0.0181218	2.85604	0.0042896	Anemia	0.0201236
E2	boneSub	13713	407	1.1366	0.128045	1.04075	1.24129	0.0449518	2.8485	0.0043926	Obesity	0.0202735
I3	OCT	43472	3393	1.0504	0.0491684	1.01506	1.08696	0.0174577	2.81643	0.00485613	Arrhythmias	0.0221994
M1	Brain_GM	37899	1034	1.08932	0.085552	1.02625	1.15627	0.0304319	2.81126	0.00493482	Rheumatoid arthritis disorders	0.0223464
I1	OCT	33432	5219	1.03987	0.0390976	1.01153	1.06901	0.0140977	2.77334	0.00554843	Hypertension	0.0246597
I5	heart	22878	219	1.21032	0.190881	1.05766	1.385	0.0687859	2.77501	0.00552003	Stroke	0.0246597
F4	boneSub	12270	115	1.27432	0.242416	1.07269	1.51386	0.0878835	2.75838	0.00580879	Mood disorders	0.0253475
I0	Pancreas	16084	1417	1.07039	0.0680223	1.01991	1.12337	0.0246474	2.75982	0.0057834	Circulatory system disorders	0.0253475
I4	Pancreas	29140	252	1.16031	0.148689	1.04362	1.29006	0.0540806	2.7494	0.0059705	Heart failure	0.0258184
M0	kidney	15350	1622	0.938286	-0.0637004	0.896571	0.981942	0.0232031	-2.74534	0.00604474	Musculoskeletal system disorders	0.025906
X4	meanOverall	45918	50	1.30706	0.267781	1.0504	1.62644	0.111539	2.40079	0.0163598	Respiratory system	0.0272664
X0	boneSub	14372	271	1.16986	0.156888	1.04401	1.31089	0.0580727	2.70158	0.00690118	All-cause mortality	0.0293147
X2	liver	27201	13	0.487258	-0.718961	0.288824	0.822026	0.26683	-2.69445	0.00705051	Nervous system	0.0296863
F3	Brain_GM	41950	22	1.40122	0.33734	1.09475	1.79348	0.125929	2.67882	0.00738823	Pyschotic disorders	0.0308378
J2	Brain_GM	39926	380	1.14286	0.133537	1.03636	1.26031	0.0499104	2.67554	0.00746087	Chronic obstructive pulmonary disease	0.0308501
X3	Brain_WM	39823	139	1.27818	0.245434	1.06765	1.53021	0.0918227	2.67291	0.00751971	Circulatory system	0.0308501
M1	liver	24347	536	0.886292	-0.120709	0.810929	0.968658	0.0453406	-2.66227	0.00776147	Rheumatoid arthritis disorders	0.0313068
X4	heart	23237	27	0.686146	-0.376665	0.520065	0.905264	0.141399	-2.66385	0.00772522	Respiratory system	0.0313068
G1	Brain_WM	39741	52	1.47966	0.391812	1.10808	1.97584	0.147545	2.65554	0.00791813	Parkinson disease	0.0316725
D1	liver	25342	544	0.888466	-0.118259	0.813919	0.969842	0.0447132	-2.64482	0.00817333	Anemia	0.0324231
C6	meanOverall	45635	141	0.843691	-0.169969	0.730701	0.974153	0.0733595	-2.31693	0.0205073	Leukaemia	0.033255
F4	Brain_GM	36782	383	1.13963	0.1307	1.03324	1.25697	0.0500022	2.61388	0.00895192	Mood disorders	0.0349343
K0	OCT	27621	10175	1.02635	0.0260113	1.00654	1.04656	0.00994736	2.6149	0.00892544	Digestive system disorders	0.0349343
N0	Brain_WM	21795	1584	1.08	0.0769618	1.01918	1.14445	0.0295714	2.60258	0.00925251	Genitourinary system disorders	0.0358162
G1	meanOverall	45815	70	1.26788	0.237349	1.03356	1.55533	0.104256	2.2766	0.0228104	Parkinson disease	0.0360164
G2	OCT	44340	289	1.16559	0.15323	1.03825	1.30856	0.0590292	2.59583	0.00943616	Epilepsy	0.0362349
J1	Brain_WM	37417	642	1.12011	0.11343	1.0279	1.22061	0.043836	2.58761	0.0096645	Influenza and Pneumonia	0.0368171
K1	meanOverall	43902	446	1.11089	0.10516	1.01368	1.21742	0.046721	2.2508	0.024398	Inflammatory bowel disease	0.0375355
I2	OCT	42708	3161	1.04792	0.0468039	1.01126	1.0859	0.0181685	2.5761	0.00999227	Ischemic heart diseases	0.0377661
D0	liver	24789	647	0.901239	-0.103984	0.831449	0.976888	0.0411238	-2.52857	0.0114528	Blood and immune disorders	0.042948
M4	Brain_GM	30301	965	1.08287	0.0796155	1.0178	1.15211	0.0316209	2.51782	0.0118085	Soft tissue disorders	0.0439386
F4	heart	20230	240	1.1764	0.162455	1.03575	1.33614	0.0649648	2.50066	0.0123961	Mood disorders	0.0457704
M2	heart	19267	1105	1.07956	0.0765573	1.01648	1.14656	0.03072	2.4921	0.0126992	Osteoarthritis	0.0465314
G4	heart	22602	114	1.24568	0.219678	1.04571	1.48388	0.0892777	2.46062	0.0138699	Sleep disorders	0.0501841
I0	kidney	19836	1968	0.949645	-0.0516672	0.911342	0.989558	0.0210055	-2.4597	0.0139052	Circulatory system disorders	0.0501841
J0	OCT	28486	5519	1.03458	0.0339967	1.0068	1.06313	0.0138887	2.4478	0.0143731	Respiratory system disorders	0.0508667
K2	OCT	44411	1395	1.06926	0.066964	1.01346	1.12813	0.027345	2.44886	0.014331	Liver diseases	0.0508667
X1	Brain_WM	39823	389	1.14612	0.136379	1.02751	1.27842	0.0557372	2.44682	0.0144122	Cancer	0.0508667
M2	Brain_WM	32974	1615	1.07013	0.0677836	1.0135	1.12993	0.0277419	2.44336	0.0145511	Osteoarthritis	0.0509819
F4	Pancreas	25598	236	1.16012	0.148524	1.02912	1.3078	0.0611342	2.42948	0.0151206	Mood disorders	0.0525933
E0	OCT	33547	7828	1.02828	0.0278838	1.00537	1.0517	0.0114943	2.42587	0.0152717	Endocrine disorders	0.0527367
H3	Brain_WM	31885	583	1.12076	0.114008	1.02198	1.22908	0.047073	2.42194	0.0154377	Ear disorders	0.0529294
M0	OCT	25822	7987	1.0275	0.0271248	1.00487	1.05063	0.0113591	2.38794	0.016943	Musculoskeletal system disorders	0.0576782
E2	Brain_GM	40143	1076	1.07324	0.070682	1.01176	1.13846	0.0300986	2.34835	0.0188569	Obesity	0.0622736
H1	Pancreas	26643	1299	1.06419	0.0622177	1.01044	1.12081	0.0264469	2.35255	0.018645	Cataracts	0.0622736
H3	Brain_GM	33688	636	1.09538	0.0911002	1.01539	1.18167	0.0386897	2.35463	0.018541	Ear disorders	0.0622736
H3	kidney	28711	572	1.10241	0.0974978	1.0162	1.19594	0.0415471	2.34668	0.0189416	Ear disorders	0.0622736
X2	OCT	44823	163	1.19512	0.178248	1.03013	1.38654	0.0758009	2.35153	0.0186966	Nervous system	0.0622736
L1	OCT	38694	3193	1.0429	0.0420034	1.00682	1.08027	0.0179612	2.33857	0.0193579	Infections and excema	0.0632094
E2	kidney	34372	955	0.940481	-0.0613638	0.89322	0.990243	0.0263059	-2.3327	0.0196638	Obesity	0.0637746
J0	boneSub	7019	382	1.12225	0.11534	1.01833	1.23678	0.0495797	2.32635	0.0199999	Respiratory system disorders	0.0644293
X3	heart	23237	79	1.29005	0.254679	1.03978	1.60055	0.110037	2.31449	0.0206407	Circulatory system	0.0660503
C0	kidney	31785	1714	0.949255	-0.0520782	0.907896	0.992497	0.0227286	-2.2913	0.0219458	Cancer	0.0697614
G4	Pancreas	28450	118	1.19958	0.181967	1.02619	1.40226	0.0796518	2.28454	0.02234	Sleep disorders	0.0705475
M0	Brain_WM	17042	1630	1.0598	0.0580844	1.00783	1.11446	0.0256569	2.26389	0.0235807	Musculoskeletal system disorders	0.0739786
M2	kidney	29855	1582	0.947966	-0.0534362	0.90472	0.99328	0.0238236	-2.24299	0.0248973	Osteoarthritis	0.0776019
X4	Pancreas	29320	26	1.41707	0.348591	1.04266	1.92593	0.156542	2.22682	0.0259593	Respiratory system	0.08039
X1	meanOverall	45918	465	1.08766	0.0840258	0.997638	1.1858	0.0440775	1.90632	0.0566086	Cancer	0.0849129
F3	meanOverall	45849	27	1.34432	0.295886	0.986629	1.83168	0.157833	1.87468	0.060837	Pyschotic disorders	0.0890297
K2	Brain_GM	41272	488	1.09944	0.0948015	1.00767	1.19957	0.0444707	2.13177	0.0330255	Liver diseases	0.101617
X0	Pancreas	29320	465	1.0934	0.0892948	1.00678	1.18748	0.0421108	2.12047	0.0339663	All-cause mortality	0.103846
F5	heart	20631	365	1.1192	0.112612	1.00808	1.24256	0.0533488	2.11087	0.0347832	Neurotic disorders	0.105671
K2	Pancreas	28797	321	1.11421	0.108145	1.00688	1.23298	0.0516774	2.0927	0.0363763	Liver diseases	0.109815
E2	Pancreas	27986	688	1.07015	0.067795	1.00229	1.1426	0.033424	2.02833	0.0425263	Obesity	0.126004
F0	heart	17612	643	1.08418	0.0808216	1.00276	1.1722	0.0398289	2.02922	0.0424359	Mental and behavioural disorders	0.126004
X3	boneSub	14372	46	1.31212	0.271642	1.00946	1.70552	0.133793	2.03031	0.0423252	Circulatory system	0.126004
I6	OCT	44124	1578	1.05279	0.051446	1.00103	1.10723	0.0257223	2.00005	0.0454944	Cerebrovascular diseases	0.133971
J1	Pancreas	27543	441	1.091	0.0870981	1.00099	1.18911	0.0439314	1.9826	0.0474126	Influenza and Pneumonia	0.138769
H1	Brain_WM	36103	1729	1.05335	0.0519723	1.00048	1.109	0.0262713	1.97829	0.0478962	Cataracts	0.139334
D0	kidney	32892	1068	0.945781	-0.0557447	0.894688	0.99979	0.0283347	-1.96737	0.0491409	Blood and immune disorders	0.141243
X4	boneSub	14372	15	1.6037	0.472313	1.00233	2.56586	0.239791	1.96969	0.0488742	Respiratory system	0.141243
E0	boneSub	9317	824	1.06749	0.0653112	0.999789	1.13978	0.0334305	1.95364	0.050744	Endocrine disorders	0.144125
N0	OCT	29780	6675	1.02459	0.0242937	0.999946	1.04984	0.0124223	1.95566	0.0505058	Genitourinary system disorders	0.144125
M0	boneSub	5858	640	1.07916	0.0761792	0.999564	1.16509	0.0390903	1.9488	0.0513194	Musculoskeletal system disorders	0.144902
I5	OCT	44191	861	1.06978	0.0674486	0.999327	1.14519	0.0347569	1.94058	0.0523089	Stroke	0.146832
N1	heart	22745	571	1.08304	0.0797738	0.996658	1.17691	0.0424097	1.88103	0.0599683	Renal failure	0.167353
G1	Pancreas	29253	42	1.27229	0.240822	0.988963	1.6368	0.128533	1.87361	0.0609836	Parkinson disease	0.168452
I7	liver	26540	271	0.888275	-0.118473	0.784706	1.00551	0.0632522	-1.87303	0.0610639	Peripheral artery diseases	0.168452
E0	Pancreas	19186	1474	1.0462	0.0451676	0.997509	1.09727	0.0243174	1.85742	0.063252	Endocrine disorders	0.172505
K1	OCT	43213	1351	1.05278	0.0514325	0.997222	1.11143	0.027661	1.85939	0.0629721	Inflammatory bowel disease	0.172505
K1	Brain_GM	40166	404	1.09583	0.0915079	0.994802	1.20711	0.0493478	1.85435	0.0636898	Inflammatory bowel disease	0.172718
A1	OCT	42805	3306	1.03297	0.0324394	0.997827	1.06935	0.0176607	1.83681	0.0662375	Bacterial infections	0.178618
M4	kidney	25763	871	0.943556	-0.0581	0.88647	1.00432	0.0318414	-1.82467	0.0680513	Soft tissue disorders	0.182484
A1	boneSub	12846	339	1.09925	0.0946286	0.992365	1.21765	0.0521911	1.81312	0.0698137	Bacterial infections	0.186014
F5	Brain_GM	37517	607	1.07603	0.0732772	0.99399	1.16484	0.0404626	1.81099	0.0701429	Neurotic disorders	0.186014
A0	boneSub	8870	306	1.10482	0.0996807	0.990928	1.2318	0.0555081	1.79579	0.0725282	Diseases of Infections	0.191283
K1	Pancreas	28090	275	1.11161	0.10581	0.989877	1.24832	0.059177	1.78803	0.0737718	Inflammatory bowel disease	0.1935
L0	Pancreas	17563	645	1.06983	0.0675011	0.992676	1.15298	0.0381905	1.76748	0.0771474	Skin disorders	0.201254
M4	boneSub	10083	339	1.09775	0.0932646	0.989425	1.21794	0.0530093	1.7594	0.0785094	Soft tissue disorders	0.2037
F1	OCT	44773	682	1.07087	0.0684678	0.992046	1.15595	0.0390075	1.75525	0.0792167	Dementia	0.20443
G3	Brain_WM	39280	132	1.1838	0.168733	0.979447	1.4308	0.0966854	1.74518	0.0809539	Transient ischemic attack	0.206946
H3	boneSub	11412	224	1.12039	0.113677	0.986065	1.27301	0.0651592	1.7446	0.0810539	Ear disorders	0.206946
I3	boneSub	13547	396	1.0878	0.0841615	0.989423	1.19597	0.0483657	1.74011	0.0818404	Arrhythmias	0.207849
C2	Brain_WM	39803	58	1.27834	0.245566	0.969041	1.68637	0.141336	1.73746	0.0823066	Lung cancer	0.207932
X1	heart	23237	258	0.896993	-0.108707	0.79307	1.01453	0.0628261	-1.73028	0.0835794	Cancer	0.210042
F0	Pancreas	22251	629	1.06803	0.0658114	0.990062	1.15213	0.0386739	1.7017	0.088811	Mental and behavioural disorders	0.220906
G2	liver	26955	40	0.75612	-0.279555	0.547962	1.04335	0.164286	-1.70164	0.0888227	Epilepsy	0.220906
G0	heart	18115	769	1.06379	0.0618368	0.990355	1.14267	0.0364948	1.6944	0.0901896	Nervous system disorders	0.222062
M0	Pancreas	12309	1141	1.05	0.048792	0.992378	1.11097	0.0287981	1.69428	0.0902127	Musculoskeletal system disorders	0.222062
A0	OCT	36558	4597	1.02557	0.0252468	0.995889	1.05613	0.0149831	1.68502	0.0919856	Diseases of Infections	0.225271
E2	liver	25980	582	0.937046	-0.065023	0.868681	1.01079	0.0386516	-1.68228	0.0925138	Obesity	0.225414
K1	Brain_WM	38086	382	1.10284	0.097885	0.983762	1.23632	0.0582952	1.67913	0.0931277	Inflammatory bowel disease	0.225764
C4	heart	22746	128	1.16933	0.156429	0.972569	1.40589	0.0940035	1.66408	0.0960963	Breast cancer	0.23179
C5	boneSub	14121	140	1.1399	0.130942	0.976031	1.33129	0.0791865	1.65359	0.0982107	Prostate cancer	0.235706
A0	Pancreas	17394	507	1.0724	0.0698998	0.98688	1.16533	0.0424023	1.64849	0.0992522	Diseases of Infections	0.23702
G4	meanOverall	44583	232	1.08568	0.0822024	0.965278	1.22109	0.059971	1.3707	0.170468	Sleep disorders	0.243526
K0	liver	12550	1676	0.959706	-0.0411278	0.913249	1.00853	0.0253163	-1.62456	0.104257	Digestive system disorders	0.24652
K2	heart	22873	306	1.09713	0.0926993	0.981049	1.22695	0.0570583	1.62464	0.104239	Liver diseases	0.24652
J1	heart	21875	406	1.08399	0.0806516	0.9831	1.19524	0.0498459	1.61802	0.105659	Influenza and Pneumonia	0.248609
G0	Pancreas	22803	770	1.05722	0.0556436	0.987903	1.1314	0.0345996	1.60821	0.107789	Nervous system disorders	0.251158
M3	OCT	43222	1207	1.04826	0.0471344	0.989751	1.11023	0.0293046	1.60843	0.107741	Sciatica	0.251158
K2	boneSub	14130	200	1.11364	0.107633	0.976379	1.2702	0.0671123	1.60378	0.108763	Liver diseases	0.252205
C0	OCT	41865	5958	1.02112	0.0209015	0.995259	1.04766	0.0130888	1.5969	0.110287	Cancer	0.254509
F2	heart	21904	260	1.10205	0.0971743	0.977771	1.24213	0.0610492	1.59174	0.111444	Substance abuse	0.254729
G0	kidney	28056	1092	0.955433	-0.0455908	0.903307	1.01057	0.0286238	-1.59276	0.111215	Nervous system disorders	0.254729
L1	Pancreas	22643	277	1.09547	0.0911872	0.978665	1.22622	0.0575281	1.58509	0.112946	Infections and excema	0.256938
X0	liver	27201	378	0.919925	-0.0834627	0.829564	1.02013	0.0527521	-1.58217	0.113611	All-cause mortality	0.257232
C3	kidney	33785	838	0.949667	-0.0516435	0.890543	1.01272	0.032797	-1.57464	0.115339	Melanoma	0.258964
I1	kidney	25432	1291	0.960367	-0.0404402	0.913207	1.00996	0.0256903	-1.57414	0.115455	Hypertension	0.258964
K1	boneSub	13749	162	1.13028	0.122463	0.969836	1.31726	0.0781091	1.56785	0.116916	Inflammatory bowel disease	0.261023
C2	liver	27191	39	0.775053	-0.254824	0.562514	1.0679	0.163531	-1.55826	0.119172	Lung cancer	0.264826
K0	meanOverall	21260	3290	1.02283	0.022575	0.988661	1.05818	0.0173364	1.30217	0.192857	Digestive system disorders	0.266821
M4	meanOverall	33036	1069	1.03944	0.0386813	0.980289	1.10216	0.0298931	1.29399	0.195669	Soft tissue disorders	0.266821
D1	heart	21717	615	1.06542	0.0633702	0.982967	1.15479	0.0410976	1.54194	0.123088	Anemia	0.272267
L1	Brain_GM	32710	476	1.07106	0.0686467	0.980377	1.17013	0.0451357	1.5209	0.128286	Infections and excema	0.281174
M3	boneSub	13471	103	1.15496	0.144065	0.959522	1.3902	0.0945862	1.52311	0.127731	Sciatica	0.281174
F5	Pancreas	26044	371	1.08012	0.0770708	0.9775	1.19351	0.0509335	1.51317	0.130237	Neurotic disorders	0.284154
H1	heart	21297	1156	1.04783	0.0467185	0.986074	1.11345	0.0309917	1.50745	0.131694	Cataracts	0.286033
X3	liver	27201	74	0.840662	-0.173566	0.670373	1.05421	0.115489	-1.50287	0.132873	Circulatory system	0.287292
C6	Brain_GM	41760	132	0.878372	-0.129685	0.740602	1.04177	0.0870463	-1.48984	0.136267	Leukaemia	0.292001
J0	Pancreas	14373	668	1.05601	0.0544951	0.98301	1.13443	0.036547	1.49109	0.135937	Respiratory system disorders	0.292001
F4	liver	23847	214	1.10762	0.102217	0.96746	1.26809	0.0690308	1.48074	0.138676	Mood disorders	0.295841
E1	kidney	34095	326	0.933162	-0.0691764	0.850911	1.02336	0.0470783	-1.46939	0.141727	Diabetes	0.301013
G3	heart	22917	92	1.17044	0.157381	0.948031	1.44503	0.107527	1.46364	0.143291	Transient ischemic attack	0.301665
G4	OCT	43881	912	1.05096	0.0497022	0.983313	1.12326	0.0339447	1.46421	0.143136	Sleep disorders	0.301665
M2	liver	22668	980	0.952807	-0.0483432	0.892497	1.01719	0.0333623	-1.44903	0.147328	Osteoarthritis	0.308809
D0	Pancreas	26714	750	1.05153	0.0502421	0.982174	1.12577	0.0348115	1.44326	0.148946	Blood and immune disorders	0.309026
I1	Pancreas	20797	950	1.04403	0.0430888	0.984693	1.10694	0.0298545	1.44329	0.148938	Hypertension	0.309026
J1	boneSub	13502	254	1.09116	0.0872436	0.969131	1.22856	0.0605108	1.44179	0.149363	Influenza and Pneumonia	0.309026
X2	heart	23237	25	1.35547	0.304145	0.895641	2.05137	0.211412	1.43864	0.150254	Nervous system	0.309536
D1	kidney	33626	892	0.956471	-0.0445046	0.899804	1.01671	0.0311606	-1.42823	0.153225	Anemia	0.312971
K3	kidney	35834	64	0.861364	-0.149238	0.702015	1.05688	0.104371	-1.42988	0.152752	Pancreatitis	0.312971
C1	Brain_GM	41942	156	1.11544	0.109249	0.95904	1.29735	0.077079	1.41737	0.156375	Colorectal cancer	0.318051
F1	heart	23211	103	1.15671	0.145583	0.944622	1.41642	0.103345	1.4087	0.158923	Dementia	0.320516
F1	boneSub	14357	62	1.18793	0.172216	0.93504	1.50923	0.122136	1.41003	0.15853	Dementia	0.320516
G0	OCT	38589	4809	1.02038	0.020172	0.991711	1.04987	0.0145387	1.38747	0.165298	Nervous system disorders	0.330596
H0	kidney	26371	1714	0.968335	-0.0321769	0.925329	1.01334	0.0231783	-1.38823	0.165066	Eye disorders	0.330596
M4	Brain_WM	28646	876	1.0504	0.0491711	0.979655	1.12625	0.0355749	1.38218	0.166915	Soft tissue disorders	0.332445
L1	meanOverall	35737	534	1.04955	0.0483585	0.96653	1.13969	0.0420425	1.15023	0.25005	Infections and excema	0.3334
F1	Pancreas	29292	99	1.13399	0.125742	0.948219	1.35615	0.0912829	1.3775	0.168359	Dementia	0.333935
M1	OCT	42107	3133	1.02474	0.0244436	0.988953	1.06183	0.0181393	1.34755	0.177804	Rheumatoid arthritis disorders	0.351217
N0	heart	12764	1064	1.04212	0.0412524	0.981005	1.10703	0.0308321	1.33797	0.180906	Genitourinary system disorders	0.355881
C3	heart	21832	628	0.947633	-0.0537876	0.875329	1.02591	0.0404948	-1.32826	0.184092	Melanoma	0.357618
C6	heart	23120	95	0.876634	-0.131665	0.721533	1.06508	0.0993447	-1.32534	0.18506	Leukaemia	0.357618
I2	liver	25621	573	0.945477	-0.0560652	0.870394	1.02704	0.0422174	-1.32801	0.184174	Ischemic heart diseases	0.357618
I2	kidney	33887	915	1.04203	0.0411696	0.980418	1.10751	0.0310956	1.32397	0.185514	Ischemic heart diseases	0.357618
J0	liver	13478	565	0.943982	-0.0576484	0.867194	1.02757	0.0432884	-1.33173	0.182949	Respiratory system disorders	0.357618
F5	Brain_WM	35529	543	1.06634	0.0642329	0.968344	1.17425	0.049185	1.30595	0.191571	Neurotic disorders	0.366072
G4	boneSub	13938	67	1.15469	0.143828	0.929149	1.43497	0.110876	1.29719	0.194565	Sleep disorders	0.366072
I4	liver	27050	216	0.915084	-0.0887392	0.800188	1.04648	0.0684548	-1.29632	0.194866	Heart failure	0.366072
I7	OCT	44097	1409	1.03583	0.0352029	0.982093	1.09251	0.0271804	1.29516	0.195266	Peripheral artery diseases	0.366072
K2	Brain_WM	39117	451	1.0713	0.0688735	0.965683	1.18847	0.0529564	1.30057	0.193406	Liver diseases	0.366072
N0	kidney	19752	1534	1.03256	0.0320449	0.983632	1.08393	0.02477	1.2937	0.195769	Genitourinary system disorders	0.366072
X0	kidney	35966	681	0.956146	-0.0448452	0.89331	1.0234	0.0346823	-1.29303	0.196001	All-cause mortality	0.366072
X4	OCT	44823	185	1.10323	0.0982385	0.950911	1.27994	0.0758042	1.29595	0.194992	Respiratory system	0.366072
I2	Brain_WM	37522	945	1.04711	0.0460328	0.976317	1.12303	0.0357152	1.28889	0.197438	Ischemic heart diseases	0.367326
K3	heart	23148	50	1.1958	0.178819	0.909906	1.57153	0.139407	1.28271	0.199593	Pancreatitis	0.368479
X4	kidney	35966	40	1.21807	0.197267	0.901088	1.64656	0.153788	1.28272	0.19959	Respiratory system	0.368479
I3	Pancreas	27639	729	1.04447	0.043506	0.976819	1.1168	0.0341639	1.27345	0.202858	Arrhythmias	0.371649
K0	heart	11031	1923	1.02976	0.0293225	0.984386	1.07722	0.0229901	1.27544	0.202155	Digestive system disorders	0.371649
A1	Pancreas	26169	602	1.04993	0.048726	0.973236	1.13267	0.0387023	1.25899	0.208032	Bacterial infections	0.37824
C4	kidney	35121	187	0.906951	-0.0976671	0.77905	1.05585	0.0775592	-1.25926	0.207937	Breast cancer	0.37824
E1	boneSub	13600	117	1.11428	0.108205	0.940478	1.32019	0.0865178	1.25067	0.211057	Diabetes	0.382291
G0	boneSub	11074	412	1.06145	0.0596375	0.965659	1.16675	0.0482569	1.23583	0.21652	Nervous system disorders	0.39057
J2	heart	22144	249	1.08297	0.0797053	0.954178	1.22914	0.0645983	1.23386	0.217254	Chronic obstructive pulmonary disease	0.39057
X2	boneSub	14372	15	1.35487	0.303705	0.834576	2.19952	0.247217	1.22849	0.219261	Nervous system	0.392707
C6	kidney	35747	116	0.902549	-0.102532	0.765435	1.06423	0.0840725	-1.21957	0.222629	Leukaemia	0.395784
J1	kidney	33798	590	1.04885	0.0476914	0.971509	1.13234	0.0390806	1.22033	0.222338	Influenza and Pneumonia	0.395784
L0	boneSub	8539	350	0.937115	-0.064949	0.843922	1.0406	0.0534427	-1.2153	0.224251	Skin disorders	0.397197
E2	meanOverall	43819	1210	1.02759	0.0272207	0.975487	1.08249	0.0265513	1.02521	0.305263	Obesity	0.398169
M4	OCT	36236	5278	1.01699	0.0168447	0.989601	1.04513	0.0139281	1.2094	0.226508	Soft tissue disorders	0.399721
C6	OCT	44618	422	0.944898	-0.0566787	0.860903	1.03709	0.0474982	-1.19328	0.232759	Leukaemia	0.409247
G1	boneSub	14342	18	0.76273	-0.270851	0.48773	1.19279	0.228138	-1.18722	0.23514	Parkinson disease	0.410426
K0	Pancreas	13552	1907	1.02715	0.0267909	0.982766	1.07355	0.0225389	1.18865	0.234578	Digestive system disorders	0.410426
C1	meanOverall	45838	168	1.07478	0.0721172	0.931005	1.24076	0.0732707	0.984257	0.324989	Colorectal cancer	0.41488
E0	liver	17876	1282	0.967255	-0.0332933	0.915059	1.02243	0.0283032	-1.17631	0.239472	Endocrine disorders	0.416473
C6	boneSub	14291	55	0.852226	-0.159903	0.652469	1.11314	0.136273	-1.17341	0.240633	Leukaemia	0.416982
D1	Pancreas	27312	624	1.04474	0.0437653	0.969524	1.12578	0.0381206	1.14807	0.250938	Anemia	0.433274
H2	Brain_WM	38651	257	1.08233	0.0791199	0.945081	1.23952	0.0691872	1.14356	0.252805	Glaucoma	0.43338
X4	Brain_WM	39823	31	1.24948	0.222728	0.853245	1.82972	0.194614	1.14446	0.252433	Respiratory system	0.43338
C2	kidney	35947	65	0.885724	-0.121349	0.718587	1.09174	0.106695	-1.13735	0.255394	Lung cancer	0.434713
G2	Brain_WM	39489	58	1.18029	0.165759	0.887115	1.57035	0.145686	1.13778	0.255213	Epilepsy	0.434713
A2	Brain_GM	30007	172	0.916453	-0.0872446	0.787134	1.06702	0.0776099	-1.12414	0.260952	Viral infections	0.442605
E2	Brain_WM	38063	992	1.04067	0.0398654	0.970075	1.1164	0.035841	1.11229	0.266015	Obesity	0.449603
C2	meanOverall	45894	73	1.10571	0.100489	0.890948	1.37224	0.110185	0.912003	0.361767	Lung cancer	0.452209
H0	boneSub	10404	712	1.04165	0.0408105	0.968639	1.12017	0.0370792	1.10063	0.271058	Eye disorders	0.456518
X3	Pancreas	29320	85	1.10775	0.102331	0.920872	1.33255	0.0942697	1.08551	0.277695	Circulatory system	0.466061
X1	Pancreas	29320	267	1.06227	0.0604102	0.950021	1.18779	0.0569811	1.06018	0.289063	Cancer	0.48345
I1	boneSub	10162	537	1.04489	0.0439117	0.962986	1.13376	0.0416477	1.05436	0.291718	Hypertension	0.484514
K3	Pancreas	29218	49	1.14819	0.138184	0.888512	1.48375	0.130814	1.05634	0.290813	Pancreatitis	0.484514
C4	Brain_GM	40997	214	1.07539	0.072683	0.93879	1.23187	0.0693109	1.04865	0.294339	Breast cancer	0.485791
L0	liver	16403	565	0.954806	-0.0462469	0.875715	1.04104	0.0441171	-1.04828	0.294511	Skin disorders	0.485791
L0	Brain_GM	25526	1016	1.03309	0.0325561	0.971873	1.09817	0.0311672	1.04456	0.296225	Skin disorders	0.486946
X4	liver	27201	22	0.801087	-0.221786	0.52659	1.21867	0.214059	-1.0361	0.300156	Respiratory system	0.491723
C1	Brain_WM	39761	150	1.09657	0.0921906	0.919397	1.30789	0.0899137	1.02532	0.305211	Colorectal cancer	0.493881
I0	boneSub	7917	818	1.0356	0.0349815	0.968684	1.10714	0.0340816	1.0264	0.304701	Circulatory system disorders	0.493881
I5	Pancreas	28858	212	1.06852	0.0662709	0.941467	1.21271	0.0645861	1.02609	0.304851	Stroke	0.493881
I5	boneSub	14158	120	1.09441	0.0902143	0.920931	1.30057	0.0880551	1.02452	0.305589	Stroke	0.493881
H0	heart	17155	1211	1.03069	0.030229	0.97228	1.09261	0.0297658	1.01556	0.309839	Eye disorders	0.49907
J3	OCT	39658	1062	0.969229	-0.0312548	0.912368	1.02963	0.0308459	-1.01326	0.310938	Asthma	0.499165
C3	meanOverall	43048	1034	0.975793	-0.0245048	0.919047	1.03604	0.0305686	-0.801633	0.422765	Melanoma	0.502861
C5	meanOverall	45002	394	1.03845	0.0377321	0.947355	1.13831	0.0468443	0.805479	0.420544	Prostate cancer	0.502861
H2	meanOverall	44550	320	1.04423	0.0432803	0.938371	1.16203	0.054537	0.793594	0.427432	Glaucoma	0.502861
A0	heart	14528	527	1.04502	0.0440345	0.958684	1.13913	0.0439949	1.0009	0.316876	Diseases of Infections	0.503108
E1	heart	22153	210	1.06912	0.0668365	0.937764	1.21888	0.0668859	0.999262	0.317668	Diabetes	0.503108
J3	liver	23503	140	1.08887	0.0851398	0.921848	1.28615	0.0849579	1.00214	0.316276	Asthma	0.503108
K3	OCT	44661	234	0.938227	-0.063763	0.827271	1.06407	0.0642153	-0.992956	0.320732	Pancreatitis	0.503108
M1	Pancreas	26371	630	1.03906	0.0383158	0.963566	1.12047	0.0384857	0.995586	0.319451	Rheumatoid arthritis disorders	0.503108
M3	liver	25626	187	0.92672	-0.0761034	0.798442	1.07561	0.0760164	-1.00115	0.316757	Sciatica	0.503108
N0	boneSub	7768	650	1.03894	0.0381968	0.963517	1.12026	0.0384507	0.993396	0.320517	Genitourinary system disorders	0.503108
G2	Pancreas	29068	49	1.14037	0.131356	0.877422	1.48213	0.133739	0.982183	0.32601	Epilepsy	0.509722
K0	Brain_GM	19515	2991	1.01749	0.0173351	0.981802	1.05447	0.0182152	0.95168	0.341259	Digestive system disorders	0.531146
L1	heart	17943	298	1.05571	0.0542092	0.944039	1.18058	0.0570402	0.950368	0.341925	Infections and excema	0.531146
I6	boneSub	14104	203	1.06748	0.0653023	0.93251	1.22199	0.0689695	0.946828	0.343726	Cerebrovascular diseases	0.532222
G4	Brain_GM	40807	212	1.06549	0.0634324	0.933205	1.21652	0.0676351	0.937863	0.348315	Sleep disorders	0.535545
H3	OCT	38977	3269	1.01673	0.0165934	0.982108	1.05258	0.0176773	0.938682	0.347894	Ear disorders	0.535545
M4	heart	16591	612	0.96318	-0.037515	0.89042	1.04189	0.0400757	-0.936104	0.34922	Soft tissue disorders	0.535545
A0	kidney	22190	758	0.968363	-0.0321487	0.905133	1.03601	0.0344519	-0.933147	0.350744	Diseases of Infections	0.536169
F4	kidney	31445	338	1.05173	0.0504409	0.944983	1.17055	0.054608	0.923692	0.355647	Mood disorders	0.538519
H2	Brain_GM	40774	281	1.05583	0.054329	0.941047	1.18462	0.0587209	0.925207	0.354858	Glaucoma	0.538519
L1	kidney	27892	418	0.958788	-0.0420851	0.876923	1.0483	0.045537	-0.924196	0.355384	Infections and excema	0.538519
I7	kidney	35108	389	0.958035	-0.0428708	0.874096	1.05004	0.0467839	-0.916359	0.359479	Peripheral artery diseases	0.542609
K1	kidney	34412	364	1.04997	0.0487659	0.945437	1.16607	0.0535083	0.91137	0.3621	Inflammatory bowel disease	0.544853
A2	liver	18410	69	0.888792	-0.117892	0.688617	1.14716	0.130195	-0.905505	0.365198	Viral infections	0.547797
J3	Brain_GM	36278	260	1.05634	0.054806	0.936376	1.19166	0.0615031	0.89111	0.37287	Asthma	0.557563
A2	Pancreas	20092	89	1.09702	0.0925946	0.893281	1.34722	0.104823	0.883344	0.37705	Viral infections	0.562063
K2	liver	26728	281	1.05387	0.0524663	0.937099	1.18519	0.0599159	0.875665	0.381212	Liver diseases	0.566507
E1	liver	25760	210	1.06134	0.0595337	0.928364	1.21337	0.0683	0.871651	0.383399	Diabetes	0.567998
M1	kidney	32520	901	0.972458	-0.0279286	0.912761	1.03606	0.0323235	-0.864033	0.38757	Rheumatoid arthritis disorders	0.572411
C5	heart	22820	243	1.05479	0.0533381	0.93279	1.19274	0.0627122	0.850522	0.395035	Prostate cancer	0.581647
A1	kidney	32282	813	0.972845	-0.0275303	0.91242	1.03727	0.0327174	-0.841459	0.400091	Bacterial infections	0.58729
J3	boneSub	12408	84	1.08914	0.0853853	0.8854	1.33975	0.105666	0.80807	0.41905	Asthma	0.613244
C0	liver	24000	1057	0.974603	-0.0257254	0.914874	1.03823	0.0322679	-0.797244	0.425309	Cancer	0.617882
C5	liver	26703	204	1.05662	0.0550765	0.922608	1.2101	0.0691989	0.795915	0.426081	Prostate cancer	0.617882
L0	heart	13913	642	0.968891	-0.0316035	0.896493	1.04714	0.039624	-0.797584	0.425112	Skin disorders	0.617882
C5	OCT	44526	1094	1.02425	0.0239565	0.964631	1.08755	0.0305957	0.783003	0.433625	Prostate cancer	0.626928
M1	meanOverall	41407	1129	1.01779	0.0176364	0.961445	1.07744	0.029059	0.606915	0.543907	Rheumatoid arthritis disorders	0.627585
A2	kidney	25567	147	1.06808	0.0658649	0.904909	1.26068	0.0845859	0.778674	0.436172	Viral infections	0.628716
M4	liver	19456	527	1.0349	0.034309	0.948689	1.12895	0.04438	0.773074	0.439478	Soft tissue disorders	0.631586
F2	liver	25596	205	0.947665	-0.0537541	0.826011	1.08724	0.0700996	-0.766824	0.443186	Substance abuse	0.633787
K3	boneSub	14329	25	0.86003	-0.150789	0.584739	1.26492	0.196841	-0.766043	0.443651	Pancreatitis	0.633787
A2	OCT	39593	1499	1.02012	0.0199226	0.969113	1.07382	0.0261723	0.761208	0.446533	Viral infections	0.636011
G0	liver	21172	677	0.970329	-0.0301204	0.897586	1.04897	0.0397588	-0.757578	0.448704	Nervous system disorders	0.636881
I1	liver	19412	832	0.973893	-0.0264534	0.909321	1.04305	0.0350027	-0.755753	0.449797	Hypertension	0.636881
H2	Pancreas	28445	190	1.05319	0.0518247	0.918287	1.20791	0.069935	0.741041	0.458669	Glaucoma	0.647532
C0	Pancreas	25920	1216	1.02072	0.0205058	0.966228	1.07828	0.0279912	0.732583	0.463813	Cancer	0.652874
C0	Brain_GM	37036	1899	1.01643	0.016293	0.97219	1.06268	0.022703	0.717659	0.472967	Cancer	0.657253
C5	Brain_GM	41212	349	0.96372	-0.0369544	0.870497	1.06693	0.0519073	-0.71193	0.476508	Prostate cancer	0.657253
G3	Brain_GM	41431	140	1.06152	0.0597038	0.90186	1.24945	0.0831647	0.717899	0.47282	Transient ischemic attack	0.657253
I2	Pancreas	27602	662	1.02618	0.0258471	0.955804	1.10175	0.0362506	0.713013	0.475838	Ischemic heart diseases	0.657253
I6	Pancreas	28759	370	1.03627	0.0356254	0.940361	1.14196	0.0495503	0.718975	0.472156	Cerebrovascular diseases	0.657253
K3	Brain_GM	41863	71	1.08737	0.0837624	0.864074	1.36837	0.117277	0.714225	0.475088	Pancreatitis	0.657253
X1	boneSub	14372	154	1.05806	0.0564379	0.906962	1.23433	0.0786199	0.717857	0.472845	Cancer	0.657253
C5	Pancreas	28789	242	1.04121	0.0403828	0.928532	1.16756	0.0584362	0.691058	0.489529	Prostate cancer	0.671488
M2	Pancreas	24342	1122	1.02025	0.0200509	0.96384	1.07997	0.0290213	0.690903	0.489627	Osteoarthritis	0.671488
C6	Brain_WM	39582	118	0.962897	-0.037809	0.863125	1.0742	0.0558106	-0.677451	0.49812	Leukaemia	0.681189
K3	Brain_WM	39676	65	1.0979	0.093403	0.83336	1.44643	0.140662	0.664024	0.506675	Pancreatitis	0.69092
J3	meanOverall	39653	282	1.02969	0.0292619	0.918189	1.15474	0.0584774	0.500397	0.616796	Asthma	0.698259
C2	heart	23223	44	1.10399	0.0989292	0.8155	1.49453	0.154535	0.640172	0.522061	Lung cancer	0.703902
C3	liver	25529	526	0.970552	-0.0298901	0.886334	1.06277	0.0463126	-0.645399	0.518669	Melanoma	0.703902
H3	Pancreas	23338	389	1.03159	0.0311016	0.937919	1.13462	0.0485689	0.64036	0.521939	Ear disorders	0.703902
K3	liver	27103	40	0.902339	-0.102765	0.65955	1.2345	0.159918	-0.642611	0.520477	Pancreatitis	0.703902
A0	liver	15888	413	0.968399	-0.0321106	0.876556	1.06987	0.0508398	-0.631603	0.527646	Diseases of Infections	0.704142
G3	liver	26808	78	0.927046	-0.075752	0.733329	1.17194	0.119598	-0.633387	0.526481	Transient ischemic attack	0.704142
G3	OCT	44474	508	1.02901	0.0285943	0.942319	1.12367	0.0449016	0.636823	0.52424	Transient ischemic attack	0.704142
L1	liver	21077	236	0.958551	-0.0423325	0.840429	1.09328	0.0670986	-0.630899	0.528107	Infections and excema	0.704142
G4	kidney	34947	184	0.961682	-0.0390718	0.849247	1.089	0.0634363	-0.615921	0.537947	Sleep disorders	0.715275
M3	meanOverall	43241	379	1.0237	0.02342	0.926778	1.13075	0.0507463	0.461512	0.644431	Sciatica	0.716035
C2	Brain_GM	41991	65	1.07463	0.0719744	0.848084	1.36169	0.120793	0.595848	0.551276	Lung cancer	0.730974
A1	liver	24209	506	0.974223	-0.0261154	0.891462	1.06467	0.0452953	-0.576559	0.564237	Bacterial infections	0.739166
C3	Brain_GM	39420	940	0.981337	-0.0188395	0.920947	1.04569	0.0324056	-0.581365	0.560995	Melanoma	0.739166
F2	kidney	33851	352	0.971326	-0.0290928	0.880106	1.072	0.050317	-0.578191	0.563135	Substance abuse	0.739166
F3	kidney	35917	21	1.13918	0.130307	0.73401	1.768	0.224259	0.581055	0.561203	Pyschotic disorders	0.739166
J0	kidney	17951	956	1.01812	0.0179532	0.9577	1.08234	0.0312119	0.575203	0.565154	Respiratory system disorders	0.739166
I6	kidney	35296	524	1.02463	0.0243276	0.942705	1.11367	0.0425158	0.572203	0.567184	Cerebrovascular diseases	0.739806
F0	liver	20780	555	0.975701	-0.0245994	0.896337	1.06209	0.0432864	-0.568294	0.569835	Mental and behavioural disorders	0.741249
E1	OCT	42816	1700	1.01394	0.0138427	0.966125	1.06412	0.0246458	0.561668	0.574342	Diabetes	0.741734
F3	liver	27166	13	1.16889	0.156052	0.680514	2.00774	0.276004	0.565396	0.571804	Pyschotic disorders	0.741734
H1	boneSub	13097	706	1.02116	0.0209434	0.948824	1.09902	0.0374882	0.558666	0.576389	Cataracts	0.741734
H2	boneSub	13910	114	1.05299	0.051629	0.878945	1.26149	0.0921763	0.560111	0.575403	Glaucoma	0.741734
G2	kidney	35651	59	0.939384	-0.0625314	0.742228	1.18891	0.12019	-0.520271	0.602875	Epilepsy	0.771679
J3	heart	20087	158	0.959633	-0.0412049	0.822029	1.12027	0.0789683	-0.52179	0.601817	Asthma	0.771679
H0	liver	19924	1115	0.983744	-0.0163892	0.924567	1.04671	0.0316541	-0.517758	0.604627	Eye disorders	0.771865
C1	OCT	44610	538	1.02261	0.0223589	0.938349	1.11444	0.0438746	0.50961	0.610325	Colorectal cancer	0.773169
C2	Pancreas	29308	45	1.07476	0.072102	0.815031	1.41727	0.141141	0.510852	0.609455	Lung cancer	0.773169
G3	boneSub	14146	50	0.93071	-0.0718072	0.706029	1.22689	0.140968	-0.509386	0.610482	Transient ischemic attack	0.773169
G4	liver	26410	107	1.04777	0.0466596	0.874794	1.25494	0.0920562	0.50686	0.612253	Sleep disorders	0.773372
G2	boneSub	14239	26	0.906591	-0.0980639	0.618071	1.32979	0.195457	-0.501716	0.615867	Epilepsy	0.775896
F3	Pancreas	29277	15	0.875693	-0.132739	0.519785	1.4753	0.266128	-0.498781	0.617933	Pyschotic disorders	0.776461
H3	heart	18383	394	0.975274	-0.0250368	0.881545	1.07897	0.0515532	-0.48565	0.627216	Ear disorders	0.784019
M3	Pancreas	27582	208	1.03366	0.033107	0.904499	1.18127	0.0681037	0.486126	0.626878	Sciatica	0.784019
A1	heart	20933	552	1.02066	0.0204513	0.938948	1.10949	0.0425756	0.480351	0.630978	Bacterial infections	0.786673
K0	kidney	16796	2671	1.00895	0.00890967	0.972417	1.04685	0.0188166	0.473501	0.635856	Digestive system disorders	0.790701
F1	kidney	35930	156	1.0371	0.0364303	0.890559	1.20776	0.077724	0.468714	0.639274	Dementia	0.790855
H1	liver	24745	1148	1.01486	0.0147526	0.954365	1.07919	0.0313588	0.470445	0.638037	Cataracts	0.790855
C1	boneSub	14350	49	1.06362	0.061678	0.814872	1.3883	0.135922	0.453774	0.649992	Colorectal cancer	0.798777
F5	boneSub	12586	197	1.03257	0.0320547	0.898169	1.18709	0.0711503	0.450521	0.652335	Neurotic disorders	0.798777
M1	boneSub	12826	359	0.976483	-0.0237978	0.881584	1.0816	0.0521628	-0.456222	0.64823	Rheumatoid arthritis disorders	0.798777
X3	kidney	35966	123	1.03755	0.0368663	0.884267	1.21741	0.0815637	0.451994	0.651273	Circulatory system	0.798777
C2	boneSub	14366	31	1.08089	0.0777829	0.765402	1.52641	0.176094	0.441713	0.658697	Lung cancer	0.802473
F1	liver	27177	75	1.05491	0.0534547	0.833076	1.33581	0.120454	0.443777	0.657204	Dementia	0.802473
E0	kidney	23700	2062	0.991052	-0.00898852	0.951577	1.03216	0.0207383	-0.433426	0.664705	Endocrine disorders	0.807743
L1	Brain_WM	30966	430	1.02302	0.0227559	0.921624	1.13556	0.0532529	0.427317	0.669148	Infections and excema	0.811089
C0	heart	20616	1253	0.988158	-0.0119129	0.934496	1.0449	0.0284877	-0.418177	0.675818	Cancer	0.812627
F3	boneSub	14347	10	1.13091	0.123024	0.631655	2.02478	0.297167	0.413989	0.678882	Pyschotic disorders	0.812627
G1	heart	23189	38	0.93396	-0.0683214	0.679198	1.28428	0.162514	-0.420404	0.67419	Parkinson disease	0.812627
J3	kidney	31060	230	1.02707	0.0267118	0.906205	1.16406	0.0638797	0.418158	0.675831	Asthma	0.812627
K0	boneSub	6691	1080	1.01251	0.0124343	0.95465	1.07388	0.0300235	0.414152	0.678763	Digestive system disorders	0.812627
N0	liver	14851	980	1.01343	0.0133453	0.950657	1.08036	0.0326265	0.409031	0.682517	Genitourinary system disorders	0.814945
I6	liver	26700	339	0.977584	-0.0226712	0.875162	1.09199	0.0564682	-0.401487	0.688062	Cerebrovascular diseases	0.819527
C1	liver	27159	84	0.956544	-0.0444287	0.768936	1.18992	0.111389	-0.398861	0.689996	Colorectal cancer	0.819723
C4	OCT	44043	849	1.01394	0.0138477	0.946881	1.08576	0.0349136	0.396629	0.691641	Breast cancer	0.819723
F3	Brain_WM	39766	21	1.10087	0.0961046	0.675934	1.79296	0.248864	0.386173	0.699368	Pyschotic disorders	0.826839
C3	OCT	43805	2507	1.00773	0.00769797	0.968855	1.04816	0.0200708	0.383541	0.701319	Melanoma	0.827108
M1	Brain_WM	35908	949	1.01309	0.0130059	0.94753	1.08319	0.0341347	0.381018	0.70319	Rheumatoid arthritis disorders	0.827282
C0	meanOverall	40399	2094	0.993751	-0.00626816	0.953004	1.03624	0.0213614	-0.293433	0.769191	Cancer	0.829003
L0	meanOverall	27883	1145	1.00843	0.00839756	0.952322	1.06785	0.0292098	0.287491	0.773736	Skin disorders	0.829003
A2	boneSub	10268	53	1.04979	0.0485881	0.800213	1.3772	0.138506	0.350803	0.725736	Viral infections	0.839406
C1	kidney	35914	132	0.97145	-0.028966	0.828805	1.13864	0.0810241	-0.357498	0.720719	Colorectal cancer	0.839406
H2	kidney	34907	241	0.978093	-0.0221504	0.866325	1.10428	0.0619117	-0.357775	0.720512	Glaucoma	0.839406
I5	liver	26790	198	0.974346	-0.0259884	0.842781	1.12645	0.0740113	-0.351141	0.725482	Stroke	0.839406
L0	kidney	21755	922	1.01146	0.0113985	0.949636	1.07732	0.0321814	0.354193	0.723194	Skin disorders	0.839406
M0	heart	9916	1145	1.0109	0.010839	0.95325	1.07203	0.0299581	0.361804	0.717498	Musculoskeletal system disorders	0.839406
M3	Brain_GM	39560	336	0.980431	-0.0197626	0.880605	1.09157	0.0547887	-0.360706	0.718319	Sciatica	0.839406
M2	OCT	39917	5713	1.00467	0.00465858	0.978667	1.03136	0.0133793	0.348194	0.727695	Osteoarthritis	0.839648
C4	liver	26559	113	0.96406	-0.0366014	0.782388	1.18792	0.106534	-0.343565	0.731173	Breast cancer	0.841232
H2	heart	22602	177	1.02676	0.026406	0.882449	1.19467	0.077277	0.341705	0.732573	Glaucoma	0.841232
F0	kidney	27391	896	0.989375	-0.0106817	0.928624	1.0541	0.0323319	-0.330377	0.741115	Mental and behavioural disorders	0.84901
G2	Brain_GM	41661	65	1.04034	0.0395481	0.818554	1.32222	0.122331	0.323289	0.746477	Epilepsy	0.853116
J2	liver	25983	198	1.02179	0.0215579	0.884548	1.18033	0.0735913	0.292941	0.769567	Chronic obstructive pulmonary disease	0.877416
C3	boneSub	13522	326	1.01591	0.0157822	0.911541	1.13222	0.0553075	0.285354	0.775373	Melanoma	0.881941
A2	Brain_WM	28273	152	0.98275	-0.0174005	0.865317	1.11612	0.0649291	-0.267992	0.788706	Viral infections	0.888563
C1	Pancreas	29278	93	0.974365	-0.0259691	0.803567	1.18147	0.0983314	-0.264098	0.791705	Colorectal cancer	0.888563
G3	Pancreas	28890	94	1.02646	0.026113	0.843631	1.2489	0.10008	0.260921	0.794153	Transient ischemic attack	0.888563
G4	Brain_WM	38676	198	1.0209	0.020683	0.877502	1.18773	0.0772257	0.267826	0.788833	Sleep disorders	0.888563
J1	liver	25607	342	0.985218	-0.0148924	0.885322	1.09639	0.0545476	-0.273016	0.784841	Influenza and Pneumonia	0.888563
K0	Brain_WM	18498	2767	1.00518	0.00516615	0.967131	1.04473	0.019688	0.262401	0.793012	Digestive system disorders	0.888563
X0	heart	23237	455	1.01306	0.0129787	0.922128	1.11297	0.0479854	0.270472	0.786797	All-cause mortality	0.888563
C0	boneSub	12758	687	1.00941	0.00936742	0.937349	1.08701	0.0377899	0.247881	0.804226	Cancer	0.889467
C4	boneSub	14061	72	0.96796	-0.0325647	0.755075	1.24086	0.126723	-0.256975	0.797198	Breast cancer	0.889467
C5	Brain_WM	39062	326	1.01395	0.0138501	0.909444	1.13046	0.0554968	0.249565	0.802923	Prostate cancer	0.889467
K1	liver	26025	234	0.982604	-0.0175488	0.858023	1.12527	0.0691728	-0.253694	0.799732	Inflammatory bowel disease	0.889467
M0	liver	11483	987	0.99169	-0.00834506	0.929495	1.05805	0.033046	-0.252529	0.800632	Musculoskeletal system disorders	0.889467
F5	kidney	32065	531	0.989594	-0.0104601	0.909447	1.0768	0.0430917	-0.24274	0.808206	Neurotic disorders	0.889769
X1	liver	27201	217	0.983004	-0.0171418	0.856889	1.12768	0.0700547	-0.244691	0.806695	Cancer	0.889769
I0	liver	15037	1287	1.00663	0.00660575	0.952193	1.06417	0.0283647	0.232887	0.815849	Circulatory system disorders	0.892045
J3	Pancreas	25325	156	1.01845	0.0182802	0.875288	1.18502	0.0772883	0.23652	0.81303	Asthma	0.892045
X2	Pancreas	29320	20	0.947336	-0.0541019	0.603191	1.48783	0.23032	-0.234899	0.814287	Nervous system	0.892045
C0	Brain_WM	35083	1760	0.99496	-0.00505262	0.951601	1.0403	0.0227336	-0.222254	0.824116	Cancer	0.89253
F2	Pancreas	27559	241	0.98597	-0.014129	0.870111	1.11726	0.0637796	-0.221528	0.824681	Substance abuse	0.89253
G1	OCT	44755	277	0.986843	-0.0132443	0.87718	1.11022	0.0601026	-0.220361	0.82559	Parkinson disease	0.89253
I3	kidney	34016	981	1.00674	0.0067157	0.949607	1.06731	0.0298083	0.225296	0.821749	Arrhythmias	0.89253
M3	heart	21897	206	1.01572	0.0155946	0.884337	1.16662	0.0706706	0.220667	0.825352	Sciatica	0.89253
F3	OCT	44716	80	0.976716	-0.0235592	0.78308	1.21823	0.112738	-0.208973	0.834469	Pyschotic disorders	0.894312
G2	heart	23026	43	0.969215	-0.0312685	0.720472	1.30384	0.151319	-0.206639	0.836292	Epilepsy	0.894312
H1	kidney	32761	1663	1.0052	0.00518656	0.958721	1.05393	0.0241543	0.214726	0.829981	Cataracts	0.894312
I4	kidney	35751	358	1.00997	0.00992202	0.919118	1.10981	0.0480943	0.206303	0.836554	Heart failure	0.894312
J2	kidney	34270	333	0.989225	-0.0108338	0.892993	1.09583	0.0522164	-0.20748	0.835635	Chronic obstructive pulmonary disease	0.894312
G2	meanOverall	45517	75	0.980036	-0.020166	0.785393	1.22292	0.112964	-0.178517	0.858317	Epilepsy	0.903491
I5	kidney	35421	307	0.990143	-0.00990586	0.889474	1.10221	0.0547048	-0.181079	0.856306	Stroke	0.913393
H3	liver	21751	336	0.990154	-0.00989492	0.885736	1.10688	0.0568587	-0.174027	0.861845	Ear disorders	0.916158
J0	heart	11594	632	0.993053	-0.00697122	0.917606	1.0747	0.0403151	-0.172918	0.862716	Respiratory system disorders	0.916158
A2	meanOverall	32845	190	1.00899	0.00894705	0.874126	1.16466	0.0732045	0.12222	0.902725	Viral infections	0.918025
C4	meanOverall	44817	229	0.991346	-0.00869127	0.862806	1.13904	0.0708554	-0.122662	0.902375	Breast cancer	0.918025
C6	Pancreas	29126	82	0.982203	-0.0179568	0.793475	1.21582	0.108868	-0.164941	0.86899	Leukaemia	0.920721
M3	kidney	33886	303	1.00921	0.009164	0.903652	1.12709	0.056366	0.16258	0.870849	Sciatica	0.920721
C4	Pancreas	28648	126	0.984583	-0.0155368	0.809839	1.19703	0.0996872	-0.155855	0.876147	Breast cancer	0.92226
C4	Brain_WM	38846	198	1.01207	0.0119994	0.871338	1.17554	0.0763916	0.157077	0.875184	Breast cancer	0.92226
C5	kidney	35329	327	0.992696	-0.0073309	0.902361	1.09207	0.0486792	-0.150596	0.880294	Prostate cancer	0.924598
A2	heart	16718	112	1.01411	0.014013	0.840363	1.22378	0.0958865	0.146141	0.88381	Viral infections	0.926264
H2	liver	26404	175	1.01123	0.011164	0.865948	1.18088	0.0791311	0.141082	0.887805	Glaucoma	0.928423
J3	Brain_WM	34388	237	1.00945	0.00940124	0.883262	1.15366	0.068131	0.137988	0.89025	Asthma	0.928957
F5	liver	24227	333	1.00767	0.00763859	0.900901	1.12709	0.0571432	0.133674	0.89366	Neurotic disorders	0.930492
K3	meanOverall	45749	80	0.990794	-0.00924871	0.797256	1.23131	0.110885	-0.083408	0.933527	Pancreatitis	0.933527
C1	heart	23200	100	0.987498	-0.0125805	0.810146	1.20368	0.101002	-0.124557	0.900874	Colorectal cancer	0.933976
L0	OCT	33371	5566	1.00168	0.00167548	0.975607	1.02844	0.0134547	0.124528	0.900898	Skin disorders	0.933976
C3	Pancreas	27547	588	0.995295	-0.00471657	0.918223	1.07884	0.0411226	-0.114695	0.908687	Melanoma	0.938151
I3	liver	25674	639	1.00462	0.00460633	0.928452	1.08703	0.0402266	0.11451	0.908834	Arrhythmias	0.938151
F3	heart	23206	19	0.976336	-0.023948	0.627323	1.51953	0.225691	-0.10611	0.915495	Pyschotic disorders	0.94268
G1	kidney	35885	59	0.988921	-0.0111404	0.783758	1.24779	0.118632	-0.0939077	0.925182	Parkinson disease	0.94268
K1	heart	22230	256	0.993682	-0.00633837	0.878589	1.12385	0.0628072	-0.100918	0.919616	Inflammatory bowel disease	0.94268
K2	kidney	35370	451	1.0043	0.00428949	0.920153	1.09614	0.044646	0.0960777	0.923459	Liver diseases	0.94268
L0	Brain_WM	24143	933	1.00305	0.00304643	0.939793	1.07057	0.0332364	0.0916595	0.926969	Skin disorders	0.94268
M1	heart	21143	636	1.00401	0.00400616	0.926932	1.08751	0.0407566	0.0982949	0.921698	Rheumatoid arthritis disorders	0.94268
M3	Brain_WM	37488	309	1.00589	0.00586958	0.896244	1.12894	0.0588851	0.0996785	0.9206	Sciatica	0.94268
L1	boneSub	10973	155	1.0059	0.00588034	0.862309	1.1734	0.0785841	0.0748286	0.940351	Infections and excema	0.954267
G1	liver	27137	35	0.991557	-0.00847888	0.711503	1.38184	0.169338	-0.0500706	0.960066	Parkinson disease	0.972219
I7	Pancreas	28598	299	0.998457	-0.00154421	0.894501	1.11449	0.0560955	-0.0275282	0.978038	Peripheral artery diseases	0.988334
C3	Brain_WM	37353	865	0.999599	-0.000401157	0.934929	1.06874	0.0341248	-0.0117556	0.990621	Melanoma	0.993944
F5	OCT	41891	2359	0.999788	-0.000212461	0.959735	1.04151	0.0208602	-0.010185	0.991874	Neurotic disorders	0.993944
N1	liver	26527	508	0.999395	-0.000604996	0.914848	1.09176	0.0450987	-0.0134149	0.989297	Renal failure	0.993944
X2	kidney	35966	31	1.00273	0.00273033	0.708022	1.42012	0.17756	0.015377	0.987731	Nervous system	0.993944
D0	heart	21271	737	0.999915	-8.48e-05	0.929029	1.07621	0.0375162	-0.00225937	0.998197	Blood and immune disorders	0.998197

## Sheet: Table9-Survival_discrete
The summary of statistics of survival analysis, without regressing age and imaging site from age gap
Target	Organ	Number of all	Number of target	HR	Beta	95% CI (lower)	95% CI (upper)	SE	Z	P	Disease	FDR
I7	Body composition	6988	92	1.46848	0.384229	1.16856	1.84538	0.11656	3.2964	0.00097932	Peripheral artery diseases	0.0072319
I4	Body composition	7150	87	1.4753	0.388859	1.16303	1.8714	0.121343	3.20463	0.00135238	Heart failure	0.00901585
I2	Body composition	6739	185	1.2745	0.242553	1.09214	1.48731	0.0787864	3.07862	0.00207962	Ischemic heart diseases	0.012582
N1	Body composition	7000	170	1.28993	0.254586	1.09529	1.51915	0.0834537	3.05063	0.0022836	Renal failure	0.0135324
J2	Body composition	6814	69	1.49428	0.401644	1.14442	1.95109	0.136096	2.95118	0.00316563	Chronic obstructive pulmonary disease	0.0180893
F2	Body composition	6724	81	1.41002	0.343604	1.1002	1.80708	0.126588	2.71435	0.00664053	Substance abuse	0.0318321
D0	Body composition	6545	216	1.21118	0.191595	1.0517	1.39484	0.0720333	2.65982	0.00781836	Blood and immune disorders	0.0367923
D1	Body composition	6704	183	1.2192	0.198193	1.0456	1.42162	0.0783715	2.52889	0.0114424	Anemia	0.0474219
F4	Body composition	6104	55	1.43246	0.359394	1.07252	1.91319	0.147646	2.43416	0.0149263	Mood disorders	0.0573169
J0	Body composition	3537	200	1.18505	0.169782	1.02466	1.37054	0.0741956	2.2883	0.0221203	Respiratory system disorders	0.0792368
E2	Body composition	6841	227	1.15882	0.147398	1.01086	1.32843	0.0696956	2.11488	0.03444	Obesity	0.112457
M2	Body composition	5913	321	1.12338	0.116338	1.00287	1.25836	0.0578932	2.00952	0.0444818	Osteoarthritis	0.1378
F0	Body composition	5245	196	1.1614	0.149629	1.00319	1.34457	0.0747197	2.00254	0.0452266	Mental and behavioural disorders	0.139159
X0	Body composition	7186	151	1.16394	0.15181	0.982173	1.37934	0.0866333	1.75233	0.0797171	All-cause mortality	0.207087
X2	Body composition	7186	7	2.14516	0.763215	0.913282	5.03866	0.435684	1.75176	0.0798147	Nervous system	0.207087
C5	Body composition	7045	78	1.2212	0.199832	0.96126	1.55143	0.122116	1.63641	0.101753	Prostate cancer	0.249255
K1	Body composition	6887	83	1.2067	0.187892	0.963515	1.51127	0.114828	1.63629	0.101779	Inflammatory bowel disease	0.249255
A1	Body composition	6426	178	1.13177	0.123784	0.970858	1.31935	0.0782459	1.58198	0.113654	Bacterial infections	0.268738
J1	Body composition	6757	136	1.1535	0.142798	0.965309	1.37837	0.0908717	1.57143	0.116084	Influenza and Pneumonia	0.271901
A0	Body composition	4461	157	1.13912	0.130259	0.967054	1.34181	0.0835527	1.559	0.118995	Diseases of Infections	0.272805
I3	Body composition	6766	213	1.11838	0.111878	0.971693	1.2872	0.0717322	1.55965	0.118842	Arrhythmias	0.272805
L0	Body composition	4222	188	0.887827	-0.118978	0.76383	1.03195	0.0767527	-1.55015	0.121106	Skin disorders	0.272916
M4	Body composition	5020	160	1.12645	0.119068	0.958792	1.32342	0.0822205	1.44815	0.147575	Soft tissue disorders	0.317651
E0	Body composition	4535	413	1.07417	0.0715494	0.97138	1.18784	0.0513208	1.39416	0.163269	Endocrine disorders	0.342578
G1	Body composition	7171	12	0.648907	-0.432466	0.35127	1.19874	0.313136	-1.38108	0.167254	Parkinson disease	0.344558
G4	Body composition	6972	43	1.23197	0.208617	0.898265	1.68966	0.16118	1.29431	0.195558	Sleep disorders	0.387884
C6	Body composition	7143	30	0.782647	-0.245073	0.53681	1.14107	0.19237	-1.27396	0.202676	Leukaemia	0.398192
H0	Body composition	5173	369	1.07009	0.0677411	0.962051	1.19026	0.0543015	1.2475	0.212215	Eye disorders	0.405829
H3	Body composition	5678	122	1.11722	0.110846	0.92758	1.34564	0.0949114	1.16789	0.24285	Ear disorders	0.443225
M3	Body composition	6703	60	1.16999	0.156996	0.897434	1.52533	0.135315	1.16023	0.245954	Sciatica	0.445646
A2	Body composition	5172	27	1.26477	0.234888	0.849432	1.88318	0.203104	1.1565	0.247479	Viral infections	0.446578
X3	Body composition	7186	32	1.24578	0.219758	0.857674	1.80949	0.190457	1.15385	0.248563	Circulatory system	0.446856
M0	Body composition	2870	309	1.06844	0.0661953	0.951962	1.19916	0.0588916	1.12402	0.261005	Musculoskeletal system disorders	0.455011
X4	Body composition	7186	6	1.88227	0.632479	0.623859	5.67908	0.563434	1.12254	0.261631	Respiratory system	0.455011
G0	Body composition	5526	218	1.08023	0.077173	0.941198	1.2398	0.0702943	1.09786	0.272267	Nervous system disorders	0.463434
C2	Body composition	7184	18	1.31724	0.275539	0.790215	2.19576	0.260714	1.05686	0.290573	Lung cancer	0.482613
N0	Body composition	3923	352	1.06016	0.0584157	0.950456	1.18252	0.0557301	1.04819	0.294551	Genitourinary system disorders	0.487533
I0	Body composition	3880	411	1.05279	0.0514481	0.95263	1.16349	0.0510096	1.0086	0.313168	Circulatory system disorders	0.511295
I1	Body composition	4971	266	1.04835	0.0472151	0.925946	1.18693	0.0633454	0.745359	0.456054	Hypertension	0.643618
I5	Body composition	7075	63	1.09241	0.08839	0.844389	1.41329	0.131397	0.672697	0.50114	Stroke	0.673884
K2	Body composition	7062	106	1.06758	0.0653988	0.876469	1.30037	0.100641	0.649824	0.515806	Liver diseases	0.683941
F1	Body composition	7177	36	1.11165	0.105844	0.786304	1.57161	0.176664	0.599125	0.549089	Dementia	0.708502
H2	Body composition	6941	58	1.08119	0.0780638	0.826958	1.41358	0.13677	0.570765	0.568159	Glaucoma	0.719568
C0	Body composition	6345	357	1.02546	0.0251428	0.920835	1.14198	0.0549076	0.457911	0.647017	Cancer	0.788244
G3	Body composition	7077	22	0.904786	-0.100057	0.586385	1.39607	0.22129	-0.452155	0.651158	Transient ischemic attack	0.789282
I6	Body composition	7051	107	1.04541	0.044409	0.857431	1.2746	0.101136	0.4391	0.660589	Cerebrovascular diseases	0.792707
L1	Body composition	5441	76	1.04854	0.0473967	0.829657	1.32516	0.119461	0.396755	0.691548	Infections and excema	0.819613
K3	Body composition	7158	10	0.887321	-0.119548	0.462646	1.70182	0.332274	-0.359789	0.719005	Pancreatitis	0.839714
H1	Body composition	6538	379	1.01914	0.0189611	0.917027	1.13263	0.0538679	0.351992	0.724845	Cataracts	0.844479
F3	Body composition	7173	5	0.879987	-0.127848	0.342133	2.26338	0.482003	-0.265243	0.790822	Pyschotic disorders	0.882239
F5	Body composition	6287	117	1.02677	0.0264145	0.851396	1.23826	0.0955594	0.27642	0.782225	Neurotic disorders	0.882239
C3	Body composition	6746	172	1.02072	0.0205046	0.873572	1.19265	0.0794248	0.258164	0.79628	Melanoma	0.884756
M1	Body composition	6399	181	0.982984	-0.0171622	0.84393	1.14495	0.0778197	-0.220537	0.825453	Rheumatoid arthritis disorders	0.903407
G2	Body composition	7125	9	1.06736	0.0651862	0.539727	2.11079	0.347903	0.187369	0.851372	Epilepsy	0.926663
C1	Body composition	7175	25	0.962243	-0.0384881	0.639393	1.44811	0.208549	-0.184552	0.85358	Colorectal cancer	0.926965
J3	Body composition	6221	46	0.973715	-0.026637	0.721556	1.31399	0.152915	-0.174195	0.861712	Asthma	0.931581
K0	Body composition	3342	540	1.00711	0.00708547	0.922552	1.09942	0.0447444	0.158354	0.874178	Digestive system disorders	0.938714
X1	Body composition	7186	82	1.01705	0.0169017	0.81113	1.27523	0.115425	0.14643	0.883582	Cancer	0.944586
C4	Body composition	7024	29	0.98023	-0.0199678	0.666786	1.44102	0.196594	-0.101569	0.919099	Breast cancer	0.957095
E1	Body composition	6722	61	1.01234	0.0122691	0.780298	1.3134	0.132833	0.0923647	0.926408	Diabetes	0.960423
X0	Brain GM	21011	432	1.5078	0.410653	1.3551	1.67771	0.0544799	7.5377	4.78e-14	All-cause mortality	1.15e-11
F1	Brain GM	20990	109	2.81617	1.03538	2.08371	3.8061	0.15369	6.7368	1.62e-11	Dementia	2.59e-09
I1	Brain GM	14634	742	1.25686	0.228613	1.16795	1.35253	0.0374311	6.10757	1.01e-09	Hypertension	9.71e-08
F0	Brain GM	16017	556	1.29951	0.261988	1.19012	1.41896	0.0448648	5.8395	5.24e-09	Mental and behavioural disorders	3.59e-07
I0	Brain GM	11442	1130	1.16713	0.154549	1.10033	1.23799	0.0300712	5.13946	2.76e-07	Circulatory system disorders	1.32e-05
I6	Brain GM	20601	326	1.3487	0.299143	1.20202	1.51328	0.0587452	5.09222	3.54e-07	Cerebrovascular diseases	1.54e-05
N1	Brain GM	20490	518	1.23971	0.214876	1.13233	1.35727	0.0462267	4.64831	3.35e-06	Renal failure	0.000100398
A1	Brain GM	18819	494	1.24503	0.21916	1.13478	1.36599	0.0473064	4.63277	3.61e-06	Bacterial infections	0.000101874
J1	Brain GM	19777	389	1.28098	0.247624	1.15245	1.42384	0.0539479	4.59006	4.43e-06	Influenza and Pneumonia	0.000118164
D0	Brain GM	19212	637	1.2072	0.1883	1.11368	1.30856	0.0411373	4.57735	4.71e-06	Blood and immune disorders	0.000118962
F2	Brain GM	19752	218	1.41582	0.347707	1.2189	1.64454	0.0764075	4.55069	5.35e-06	Substance abuse	0.000128328
A0	Brain GM	13063	441	1.24918	0.222487	1.13221	1.37824	0.050163	4.43528	9.2e-06	Diseases of Infections	0.000182988
I4	Brain GM	20863	239	1.36579	0.311735	1.18972	1.56792	0.0704172	4.42698	9.56e-06	Heart failure	0.000182988
D1	Brain GM	19640	526	1.21724	0.196586	1.11368	1.33043	0.0453681	4.33312	1.47e-05	Anemia	0.000252014
J0	Brain GM	10589	569	1.19687	0.179707	1.09913	1.30329	0.0434641	4.13462	3.56e-05	Respiratory system disorders	0.000550525
X1	Brain GM	21011	231	1.32947	0.284783	1.15742	1.5271	0.0707083	4.02758	5.64e-05	Cancer	0.000819704
G0	Brain GM	16367	673	1.16957	0.156634	1.08184	1.26441	0.0397826	3.93726	8.24e-05	Nervous system disorders	0.0011078
H0	Brain GM	15288	983	1.13346	0.125271	1.06344	1.20808	0.0325325	3.85064	0.000117811	Eye disorders	0.00147312
I5	Brain GM	20674	190	1.33731	0.29066	1.15039	1.5546	0.0768176	3.78376	0.000154474	Stroke	0.00176542
E0	Brain GM	13626	1173	1.11533	0.10915	1.05216	1.18229	0.0297466	3.66934	0.000243174	Endocrine disorders	0.0026528
I2	Brain GM	19729	553	1.17278	0.159373	1.07567	1.27865	0.0440985	3.61402	0.000301487	Ischemic heart diseases	0.00308792
X3	Brain GM	21011	85	1.58412	0.460027	1.23429	2.0331	0.127316	3.61327	0.000302358	Circulatory system	0.00308792
E2	Brain GM	20019	545	1.17193	0.158652	1.07044	1.28305	0.0462175	3.43273	0.000597543	Obesity	0.00486137
I3	Brain GM	19820	549	1.16041	0.148775	1.06444	1.26503	0.0440435	3.3779	0.000730405	Arrhythmias	0.00565475
H1	Brain GM	18963	972	1.11294	0.107004	1.04399	1.18645	0.0326319	3.27913	0.00104127	Cataracts	0.00757287
N0	Brain GM	11591	893	1.11915	0.112566	1.04601	1.1974	0.0344824	3.26444	0.00109681	Genitourinary system disorders	0.00785773
M0	Brain GM	8958	903	1.11537	0.109187	1.04349	1.1922	0.0339892	3.21239	0.00131635	Musculoskeletal system disorders	0.00889929
M1	Brain GM	18957	546	1.14823	0.13822	1.05341	1.25158	0.0439734	3.14326	0.00167075	Rheumatoid arthritis disorders	0.0104151
X2	Brain GM	21011	23	2.57095	0.944277	1.39898	4.72473	0.310482	3.04132	0.00235543	Nervous system	0.0137879
J2	Brain GM	19937	193	1.24882	0.222198	1.07636	1.44892	0.0758265	2.93035	0.0033858	Chronic obstructive pulmonary disease	0.0188975
M4	Brain GM	15053	470	1.14419	0.134701	1.04254	1.25576	0.0474688	2.83767	0.00454446	Soft tissue disorders	0.0239708
G1	Brain GM	20963	33	1.83089	0.604804	1.2018	2.78928	0.21479	2.81579	0.00486571	Parkinson disease	0.0251133
M2	Brain GM	17347	888	1.09818	0.093656	1.02683	1.1745	0.0342774	2.73229	0.00628949	Osteoarthritis	0.0308057
I7	Brain GM	20479	240	1.18858	0.172762	1.04239	1.35528	0.0669647	2.5799	0.00988287	Peripheral artery diseases	0.0431252
L1	Brain GM	16349	237	1.18276	0.167848	1.03573	1.35066	0.0677273	2.47829	0.0132015	Infections and excema	0.052565
K1	Brain GM	20056	197	1.19676	0.179617	1.03488	1.38396	0.0741513	2.42231	0.0154223	Inflammatory bowel disease	0.0587517
C0	Brain GM	18471	945	1.07959	0.076582	1.01192	1.15179	0.0330289	2.31863	0.020415	Cancer	0.0742364
X4	Brain GM	21011	28	1.70721	0.534859	1.08201	2.69364	0.232675	2.29874	0.0215198	Respiratory system	0.0776654
H3	Brain GM	16803	325	1.13309	0.124949	1.01347	1.26683	0.0569233	2.19504	0.028161	Ear disorders	0.0945263
E1	Brain GM	19790	209	1.17046	0.157394	1.01627	1.34803	0.0720683	2.18395	0.0289657	Diabetes	0.0965524
F3	Brain GM	20983	11	3.09587	1.13007	1.1031	8.68865	0.526514	2.14632	0.0318472	Pyschotic disorders	0.105425
K2	Brain GM	20636	241	1.14946	0.13929	1.0076	1.31128	0.067203	2.07267	0.0382026	Liver diseases	0.123069
F4	Brain GM	18371	216	1.15398	0.143214	1.00459	1.32558	0.0707344	2.02467	0.0429008	Mood disorders	0.136373
F5	Brain GM	18787	305	1.11909	0.112519	0.996986	1.25616	0.0589486	1.90877	0.0562924	Neurotic disorders	0.161799
C1	Brain GM	20974	88	1.20592	0.187246	0.969921	1.49935	0.111118	1.68511	0.0919666	Colorectal cancer	0.23112
L0	Brain GM	12748	496	1.07473	0.0720686	0.982329	1.17582	0.045867	1.57125	0.116125	Skin disorders	0.271901
C4	Brain GM	20487	104	1.15318	0.142522	0.949049	1.40121	0.0993982	1.43385	0.151615	Breast cancer	0.324889
K0	Brain GM	9646	1485	1.03709	0.036418	0.984918	1.09202	0.0263344	1.38291	0.166694	Digestive system disorders	0.344558
C6	Brain GM	20883	67	0.890372	-0.116116	0.698191	1.13545	0.124057	-0.935992	0.349277	Leukaemia	0.540816
J3	Brain GM	18132	124	1.0902	0.0863635	0.910063	1.306	0.0921471	0.937235	0.348638	Asthma	0.540816
C2	Brain GM	21001	35	1.17562	0.161792	0.833765	1.65763	0.175307	0.922907	0.356056	Lung cancer	0.545308
H2	Brain GM	20375	139	1.0685	0.0662532	0.902663	1.2648	0.086052	0.769921	0.441347	Glaucoma	0.628625
C3	Brain GM	19696	443	1.03675	0.0360947	0.943633	1.13906	0.0480176	0.751697	0.452234	Melanoma	0.641362
G3	Brain GM	20700	86	1.08357	0.0802652	0.874119	1.34322	0.109596	0.732373	0.463941	Transient ischemic attack	0.643618
G4	Brain GM	20392	113	1.07235	0.0698499	0.883813	1.3011	0.0986549	0.708023	0.478931	Sleep disorders	0.654861
K3	Brain GM	20938	28	1.12946	0.121739	0.768162	1.66069	0.196684	0.618958	0.535944	Pancreatitis	0.693405
M3	Brain GM	19762	169	0.952414	-0.048756	0.816659	1.11073	0.0784593	-0.621417	0.534325	Sciatica	0.693405
G2	Brain GM	20819	41	1.05138	0.0501083	0.768324	1.43873	0.160029	0.313119	0.75419	Epilepsy	0.863662
C5	Brain GM	20605	182	0.991663	-0.00837189	0.855998	1.14883	0.0750604	-0.111535	0.911192	Prostate cancer	0.957095
A2	Brain GM	15051	80	0.998828	-0.00117252	0.798751	1.24902	0.11405	-0.0102808	0.991797	Viral infections	0.998035
I6	Brain WM	19539	304	1.44767	0.369952	1.27981	1.63754	0.0628793	5.88353	4.02e-09	Cerebrovascular diseases	3.21e-07
F1	Brain WM	19888	78	2.44823	0.895364	1.77487	3.37705	0.164104	5.45607	4.87e-08	Dementia	2.92e-06
I1	Brain WM	14000	667	1.224	0.202125	1.13212	1.32334	0.0398147	5.07666	3.84e-07	Hypertension	1.54e-05
F0	Brain WM	15268	452	1.26921	0.238397	1.15116	1.39937	0.0498097	4.78615	1.7e-06	Mental and behavioural disorders	5.83e-05
X0	Brain WM	19910	377	1.29938	0.261885	1.16514	1.44908	0.0556371	4.70703	2.51e-06	All-cause mortality	8.04e-05
G0	Brain WM	15495	600	1.20868	0.189527	1.11134	1.31454	0.0428392	4.42414	9.68e-06	Nervous system disorders	0.000182988
D0	Brain WM	18164	559	1.21208	0.19234	1.11091	1.32247	0.0444714	4.32503	1.53e-05	Blood and immune disorders	0.00025243
D1	Brain WM	18572	471	1.22861	0.205885	1.11703	1.35134	0.0485797	4.23809	2.25e-05	Anemia	0.00036068
A0	Brain WM	12243	398	1.23599	0.211875	1.11462	1.37058	0.0527363	4.01763	5.88e-05	Diseases of Infections	0.000829915
I5	Brain WM	19610	174	1.36489	0.311073	1.16339	1.60128	0.0814971	3.81699	0.00013509	Stroke	0.00162109
E0	Brain WM	12974	1095	1.11913	0.112551	1.05307	1.18934	0.0310444	3.62549	0.000288416	Endocrine disorders	0.00307644
J2	Brain WM	18922	176	1.32983	0.285049	1.13251	1.56152	0.081946	3.4785	0.000504237	Chronic obstructive pulmonary disease	0.00440062
J0	Brain WM	9985	494	1.17641	0.16247	1.07303	1.28976	0.046933	3.46174	0.000536702	Respiratory system disorders	0.00450937
F4	Brain WM	17521	180	1.31497	0.273818	1.1237	1.53881	0.0802013	3.41413	0.000639859	Mood disorders	0.00511888
A1	Brain WM	17852	426	1.18426	0.169121	1.07176	1.30858	0.0509303	3.32063	0.000898159	Bacterial infections	0.00684312
N1	Brain WM	19417	478	1.16968	0.156727	1.06416	1.28566	0.0482364	3.24915	0.00115752	Renal failure	0.00805232
I7	Brain WM	19393	208	1.27146	0.240168	1.09875	1.47132	0.0744863	3.22432	0.00126273	Peripheral artery diseases	0.00865873
H0	Brain WM	14374	925	1.11182	0.106002	1.04086	1.18763	0.0336508	3.15006	0.00163234	Eye disorders	0.0104151
I0	Brain WM	10781	1005	1.10373	0.0986987	1.03666	1.17515	0.0319886	3.08543	0.00203258	Circulatory system disorders	0.0125082
I3	Brain WM	18777	515	1.1295	0.121779	1.03241	1.23573	0.0458577	2.65559	0.00791699	Arrhythmias	0.0368947
X2	Brain WM	19910	21	2.08985	0.737093	1.20745	3.61711	0.279895	2.63346	0.00845188	Nervous system	0.0382727
E1	Brain WM	18806	200	1.21993	0.198798	1.05156	1.41528	0.0757803	2.62334	0.0087072	Diabetes	0.0390603
I4	Brain WM	19765	207	1.21153	0.191885	1.04698	1.40194	0.074477	2.57643	0.00998262	Heart failure	0.0431681
M2	Brain WM	16534	827	1.0963	0.0919366	1.02191	1.17609	0.0358491	2.56455	0.0103311	Osteoarthritis	0.0438843
F2	Brain WM	18705	177	1.23098	0.207813	1.04915	1.44433	0.08155	2.54829	0.0108252	Substance abuse	0.0455799
K1	Brain WM	18997	191	1.2068	0.187972	1.04047	1.39972	0.0756639	2.4843	0.0129807	Inflammatory bowel disease	0.052359
H1	Brain WM	17982	892	1.07922	0.0762373	1.00924	1.15404	0.0342025	2.229	0.025814	Cataracts	0.0878774
H3	Brain WM	15949	299	1.13325	0.125088	1.00772	1.27441	0.0598962	2.08841	0.0367605	Ear disorders	0.119223
J1	Brain WM	18740	335	1.12371	0.116638	1.00442	1.25718	0.0572619	2.03693	0.0416575	Influenza and Pneumonia	0.133304
X3	Brain WM	19910	78	1.28847	0.253459	1.00778	1.64735	0.125364	2.02178	0.0431991	Circulatory system	0.136418
M0	Brain WM	8520	801	1.07452	0.0718729	1.00105	1.15338	0.0361356	1.98897	0.046704	Musculoskeletal system disorders	0.13928
N0	Brain WM	10931	813	1.07537	0.0726693	1.00125	1.15499	0.03644	1.99422	0.0461281	Genitourinary system disorders	0.13928
G1	Brain WM	19859	31	1.46576	0.382377	0.987434	2.17581	0.201546	1.89722	0.0577989	Parkinson disease	0.162749
X4	Brain WM	19910	12	1.71379	0.538706	0.883555	3.32415	0.33802	1.59371	0.111001	Respiratory system	0.265077
G3	Brain WM	19614	71	1.21707	0.196443	0.954871	1.55126	0.123789	1.58692	0.112532	Transient ischemic attack	0.267402
X1	Brain WM	19910	209	1.11725	0.11087	0.970689	1.28594	0.0717458	1.54532	0.122269	Cancer	0.274248
M1	Brain WM	17892	463	1.07053	0.0681505	0.974809	1.17564	0.0477888	1.42608	0.153846	Rheumatoid arthritis disorders	0.328205
G2	Brain WM	19733	33	1.29992	0.2623	0.897386	1.883	0.189069	1.38732	0.165343	Epilepsy	0.343571
C2	Brain WM	19897	26	1.30439	0.265736	0.864742	1.96756	0.209728	1.26705	0.205138	Lung cancer	0.398192
I2	Brain WM	18719	482	1.06179	0.0599592	0.967922	1.16477	0.0472267	1.2696	0.204226	Ischemic heart diseases	0.398192
C3	Brain WM	18668	410	1.06379	0.0618339	0.96369	1.17428	0.0504188	1.22641	0.220046	Melanoma	0.415835
E2	Brain WM	18990	489	1.06086	0.0590809	0.964338	1.16705	0.0486714	1.21387	0.224796	Obesity	0.421493
J3	Brain WM	17211	117	1.11583	0.109594	0.92526	1.34564	0.0955499	1.14698	0.251389	Asthma	0.448575
M4	Brain WM	14335	434	1.05608	0.0545676	0.958604	1.16348	0.0494115	1.10435	0.26944	Soft tissue disorders	0.461898
C1	Brain WM	19878	83	1.1308	0.122924	0.902473	1.41689	0.115074	1.06822	0.285421	Colorectal cancer	0.478941
K2	Brain WM	19529	229	1.06686	0.0647169	0.932599	1.22044	0.0686221	0.943092	0.345634	Liver diseases	0.540405
C0	Brain WM	17522	862	1.03017	0.02972	0.962103	1.10304	0.0348749	0.85219	0.394109	Cancer	0.583865
C6	Brain WM	19780	59	0.901428	-0.103775	0.694066	1.17074	0.133376	-0.778063	0.436532	Leukaemia	0.623617
F5	Brain WM	17786	270	1.0456	0.0445946	0.924659	1.18237	0.0627177	0.711037	0.477061	Neurotic disorders	0.654255
H2	Brain WM	19325	128	1.06669	0.064559	0.893258	1.27379	0.0905318	0.713109	0.475778	Glaucoma	0.654255
K0	Brain WM	9193	1389	1.0172	0.0170578	0.963826	1.07354	0.0275016	0.620246	0.535096	Digestive system disorders	0.693405
C5	Brain WM	19542	164	1.04888	0.0477226	0.895088	1.2291	0.0808975	0.589914	0.555248	Prostate cancer	0.712618
C4	Brain WM	19411	88	1.05772	0.0561136	0.85592	1.30709	0.108008	0.519533	0.603389	Breast cancer	0.756206
G4	Brain WM	19327	104	1.02804	0.0276527	0.838026	1.26113	0.104267	0.265211	0.790847	Sleep disorders	0.882239
K3	Brain WM	19830	43	1.04274	0.0418565	0.763763	1.42363	0.158857	0.263485	0.792177	Pancreatitis	0.882239
M3	Brain WM	18776	165	1.02219	0.0219522	0.873469	1.19624	0.0802231	0.273639	0.784362	Sciatica	0.882239
F3	Brain WM	19875	10	0.963663	-0.0370135	0.51128	1.81632	0.323385	-0.114456	0.908876	Pyschotic disorders	0.957095
L0	Brain WM	12083	455	0.994489	-0.0055264	0.905091	1.09272	0.048059	-0.114992	0.908452	Skin disorders	0.957095
A2	Brain WM	14155	80	1.0073	0.00727807	0.805612	1.25949	0.113998	0.0638439	0.949094	Viral infections	0.97343
L1	Brain WM	15518	203	0.997389	-0.00261469	0.865137	1.14986	0.0725794	-0.0360253	0.971262	Infections and excema	0.987724
I1	heart	8287	440	1.47321	0.387445	1.33452	1.62631	0.0504456	7.68045	1.59e-14	Hypertension	7.61e-12
I0	heart	6485	675	1.27167	0.240331	1.17771	1.37313	0.039163	6.13669	8.43e-10	Circulatory system disorders	9.71e-08
I3	heart	11003	325	1.29904	0.261627	1.15951	1.45537	0.0579757	4.5127	6.4e-06	Arrhythmias	0.000145328
I6	heart	11390	187	1.35385	0.302953	1.16424	1.57434	0.0769832	3.93532	8.31e-05	Cerebrovascular diseases	0.0011078
E0	heart	7850	683	1.15828	0.146934	1.07311	1.2502	0.0389647	3.77094	0.000162633	Endocrine disorders	0.00181544
I7	heart	11341	129	1.39566	0.333365	1.15921	1.68033	0.0947071	3.51996	0.000431613	Peripheral artery diseases	0.00406224
E2	heart	11148	324	1.19986	0.182209	1.07229	1.34262	0.0573563	3.17678	0.00148918	Obesity	0.00979187
X3	heart	11616	38	1.7507	0.560015	1.19953	2.55512	0.192904	2.90307	0.00369525	Circulatory system	0.0201559
I5	heart	11424	112	1.32959	0.284867	1.09507	1.61433	0.099007	2.87724	0.0040117	Stroke	0.0216361
I4	heart	11597	120	1.30785	0.268383	1.08424	1.57757	0.0956653	2.80544	0.00502483	Heart failure	0.0256587
M2	heart	9678	512	1.13117	0.123255	1.03566	1.23549	0.0450068	2.73859	0.00617023	Osteoarthritis	0.0305331
I2	heart	11171	334	1.16391	0.151784	1.04297	1.29887	0.0559778	2.7115	0.006698	Ischemic heart diseases	0.0318321
G4	heart	11314	50	1.50109	0.406191	1.10637	2.03664	0.155671	2.60929	0.00907304	Sleep disorders	0.0403246
N1	heart	11369	295	1.16276	0.150797	1.03419	1.30732	0.0597883	2.52218	0.0116629	Renal failure	0.0478479
K2	heart	11430	152	1.22297	0.201279	1.03832	1.44045	0.0835093	2.41026	0.015941	Liver diseases	0.0602495
X4	heart	11616	16	0.533877	-0.627589	0.300195	0.949468	0.293748	-2.13649	0.0326396	Respiratory system	0.107308
D1	heart	10903	333	1.11747	0.111068	1.00181	1.24649	0.055748	1.99233	0.046335	Anemia	0.13928
F4	heart	10118	127	1.19846	0.181034	1.00263	1.43252	0.091024	1.98886	0.046717	Mood disorders	0.13928
C5	heart	11410	127	1.1927	0.176223	0.996943	1.4269	0.0914734	1.92649	0.0540432	Prostate cancer	0.156269
G2	heart	11512	24	0.684385	-0.379235	0.446726	1.04848	0.217645	-1.74245	0.0814301	Epilepsy	0.210142
N0	heart	6449	540	1.07434	0.0717076	0.98638	1.17015	0.0435828	1.64532	0.0999043	Genitourinary system disorders	0.247186
G0	heart	9155	387	1.08617	0.0826549	0.981976	1.20141	0.0514518	1.60646	0.108174	Nervous system disorders	0.26224
K3	heart	11569	24	1.39677	0.334162	0.910078	2.14373	0.218569	1.52886	0.126298	Pancreatitis	0.281968
J2	heart	11063	129	1.14514	0.135529	0.959547	1.36664	0.0902176	1.50225	0.133034	Chronic obstructive pulmonary disease	0.294268
F2	heart	10897	137	1.12756	0.120053	0.949389	1.33916	0.0877516	1.3681	0.171281	Substance abuse	0.349851
J3	heart	10049	76	0.862454	-0.147973	0.686186	1.084	0.116652	-1.2685	0.20462	Asthma	0.398192
G3	heart	11462	46	1.20557	0.186955	0.896761	1.62073	0.150983	1.23826	0.215621	Transient ischemic attack	0.410707
X2	heart	11616	10	1.52381	0.421211	0.768456	3.02162	0.349284	1.20593	0.227845	Nervous system	0.423898
J1	heart	10934	196	1.0911	0.0871851	0.946375	1.25795	0.0726043	1.20083	0.229819	Influenza and Pneumonia	0.425919
H1	heart	10667	583	1.05166	0.0503733	0.968363	1.14213	0.0421039	1.19641	0.231538	Cataracts	0.427455
E1	heart	11081	101	1.12864	0.121014	0.924251	1.37823	0.101933	1.18719	0.235154	Diabetes	0.432467
C0	heart	10366	617	1.04729	0.0462063	0.967225	1.13398	0.0405773	1.13872	0.254818	Cancer	0.451339
H0	heart	8598	620	1.04529	0.0442964	0.965207	1.13202	0.0406688	1.0892	0.276066	Eye disorders	0.46824
F0	heart	8804	322	1.05845	0.0568039	0.947527	1.18235	0.0564823	1.00569	0.314563	Mental and behavioural disorders	0.511608
L0	heart	6974	325	0.946742	-0.0547284	0.848583	1.05626	0.0558473	-0.979965	0.327104	Skin disorders	0.522285
X1	heart	11616	114	0.911799	-0.0923356	0.756765	1.09859	0.0950868	-0.971067	0.331515	Cancer	0.522859
F5	heart	10349	193	1.07057	0.0681887	0.928266	1.23468	0.0727694	0.937052	0.348732	Neurotic disorders	0.540816
H2	heart	11304	75	1.11147	0.105681	0.883248	1.39865	0.117262	0.901236	0.367463	Glaucoma	0.552923
F1	heart	11603	49	1.13989	0.130931	0.855554	1.51872	0.1464	0.894342	0.371139	Dementia	0.554974
K0	heart	5482	955	1.02816	0.0277699	0.964643	1.09586	0.0325346	0.853551	0.393354	Digestive system disorders	0.583865
C4	heart	11392	64	1.09717	0.0927368	0.856163	1.40603	0.126549	0.732815	0.463671	Breast cancer	0.643618
J0	heart	5793	322	0.963429	-0.0372562	0.862733	1.07588	0.0563242	-0.661459	0.508318	Respiratory system disorders	0.679645
G1	heart	11586	16	0.848253	-0.164577	0.51485	1.39756	0.254751	-0.64603	0.51826	Parkinson disease	0.685303
D0	heart	10688	402	1.0305	0.0300462	0.933565	1.13751	0.0504046	0.596101	0.551108	Blood and immune disorders	0.7092
C6	heart	11561	47	0.917401	-0.0862111	0.686778	1.22547	0.147724	-0.583597	0.559491	Leukaemia	0.716149
F3	heart	11598	12	1.18534	0.170029	0.664904	2.11313	0.294976	0.576416	0.564334	Pyschotic disorders	0.717009
C2	heart	11609	20	1.11389	0.107856	0.71355	1.73883	0.227228	0.47466	0.635029	Lung cancer	0.783568
X0	heart	11616	217	1.03341	0.0328631	0.90249	1.18332	0.0691136	0.475493	0.634436	All-cause mortality	0.783568
A1	heart	10483	274	0.972164	-0.0282308	0.862811	1.09538	0.060883	-0.463689	0.642871	Bacterial infections	0.787315
C3	heart	10966	303	0.975542	-0.0247625	0.871024	1.0926	0.0578192	-0.428275	0.668451	Melanoma	0.800141
K1	heart	11077	126	1.03701	0.0363408	0.869824	1.23633	0.089698	0.405146	0.68537	Inflammatory bowel disease	0.816322
A2	heart	8371	57	1.04498	0.0439982	0.804746	1.35693	0.133281	0.330115	0.741313	Viral infections	0.857422
C1	heart	11601	52	1.04327	0.0423572	0.792736	1.37297	0.140116	0.302301	0.762423	Colorectal cancer	0.867211
M0	heart	4987	574	1.0106	0.0105449	0.930498	1.0976	0.0421334	0.250275	0.802375	Musculoskeletal system disorders	0.889027
M4	heart	8332	329	0.987893	-0.0121812	0.886145	1.10132	0.0554571	-0.21965	0.826144	Soft tissue disorders	0.903407
H3	heart	9192	209	1.00805	0.00802186	0.878726	1.15642	0.0700546	0.114509	0.908835	Ear disorders	0.957095
L1	heart	8965	145	0.989877	-0.010175	0.84014	1.1663	0.0836809	-0.121593	0.903222	Infections and excema	0.957095
M3	heart	10938	102	0.993148	-0.00687577	0.81673	1.20767	0.0997829	-0.0689074	0.945063	Sciatica	0.97343
M1	heart	10591	305	1.00193	0.00192871	0.894069	1.1228	0.0581139	0.0331884	0.973524	Rheumatoid arthritis disorders	0.987932
A0	heart	7271	250	0.999612	-0.000388143	0.882112	1.13276	0.063801	-0.00608366	0.995146	Diseases of Infections	0.99931
N1	kidney	17524	469	1.28558	0.251206	1.16479	1.41889	0.0503419	4.99	6.04e-07	Renal failure	2.23e-05
I0	kidney	9481	994	0.890131	-0.116387	0.834298	0.9497	0.0330503	-3.52151	0.000429091	Circulatory system disorders	0.00406224
X1	kidney	17980	214	0.809216	-0.211689	0.702706	0.931871	0.0720053	-2.93991	0.0032831	Cancer	0.0185398
G3	kidney	17703	72	1.38735	0.327397	1.07638	1.78817	0.129491	2.52834	0.0114603	Transient ischemic attack	0.0474219
C0	kidney	15821	901	0.922366	-0.0808132	0.861825	0.98716	0.0346385	-2.33305	0.0196456	Cancer	0.0719839
I1	kidney	12297	683	0.91424	-0.0896617	0.845699	0.988337	0.0397608	-2.25502	0.0241318	Hypertension	0.0845493
M2	kidney	14902	824	0.921882	-0.0813377	0.858471	0.989978	0.0363602	-2.237	0.0252866	Osteoarthritis	0.0866969
E2	kidney	17116	499	0.912088	-0.0920189	0.83336	0.998253	0.0460572	-1.99792	0.0457248	Obesity	0.13928
M0	kidney	7596	838	0.931478	-0.0709826	0.86821	0.999357	0.0358881	-1.97789	0.0479416	Musculoskeletal system disorders	0.141178
C6	kidney	17875	64	0.788831	-0.237203	0.610385	1.01945	0.130851	-1.81277	0.0698672	Leukaemia	0.188858
H3	kidney	14355	312	1.11139	0.105608	0.98877	1.24921	0.059645	1.77062	0.0766246	Ear disorders	0.202087
X0	kidney	17980	378	0.912977	-0.0910449	0.821804	1.01426	0.0536787	-1.69611	0.0898656	All-cause mortality	0.227029
D0	kidney	16454	555	0.933437	-0.0688814	0.85582	1.01809	0.0442937	-1.55511	0.119921	Blood and immune disorders	0.272805
L1	kidney	13908	214	0.898543	-0.106981	0.782182	1.03221	0.0707599	-1.51188	0.130564	Infections and excema	0.290142
I7	kidney	17546	210	0.900518	-0.104785	0.782397	1.03647	0.0717401	-1.46062	0.144119	Peripheral artery diseases	0.31302
M4	kidney	12860	454	0.934571	-0.0676679	0.849445	1.02823	0.0487275	-1.3887	0.164925	Soft tissue disorders	0.343571
H2	kidney	17430	131	0.88161	-0.126006	0.736249	1.05567	0.0919309	-1.37066	0.170481	Glaucoma	0.349705
X4	kidney	17980	15	1.38759	0.327566	0.793776	2.42562	0.284964	1.1495	0.250351	Respiratory system	0.44839
I6	kidney	17616	299	1.07017	0.0678174	0.949809	1.20578	0.0608745	1.11405	0.265257	Cerebrovascular diseases	0.457997
K3	kidney	17913	34	0.817389	-0.201641	0.573555	1.16488	0.180749	-1.11559	0.264599	Pancreatitis	0.457997
C3	kidney	16864	424	0.948677	-0.0526867	0.859147	1.04754	0.0505764	-1.04172	0.29754	Melanoma	0.490787
J1	kidney	16908	317	1.06204	0.0601873	0.946304	1.19192	0.0588679	1.02241	0.306585	Influenza and Pneumonia	0.503976
G1	kidney	17941	30	0.827835	-0.188941	0.569314	1.20375	0.191015	-0.989141	0.322594	Parkinson disease	0.519615
F3	kidney	17954	8	1.44515	0.368213	0.691526	3.02007	0.376062	0.979129	0.327516	Pyschotic disorders	0.522285
N0	kidney	9985	814	1.03623	0.0355935	0.964704	1.11307	0.0364942	0.975319	0.329402	Genitourinary system disorders	0.522859
C5	kidney	17616	177	0.931661	-0.0707861	0.801443	1.08304	0.0768157	-0.921506	0.356786	Prostate cancer	0.545308
D1	kidney	16842	467	0.956509	-0.0444654	0.87001	1.05161	0.0483607	-0.919453	0.357858	Anemia	0.545308
F0	kidney	13758	469	0.956942	-0.044013	0.871559	1.05069	0.0476842	-0.923009	0.356002	Mental and behavioural disorders	0.545308
I2	kidney	16822	437	1.04671	0.0456527	0.94901	1.15447	0.0499952	0.913142	0.361168	Ischemic heart diseases	0.54861
G0	kidney	14044	571	0.961378	-0.0393875	0.882643	1.04714	0.0435962	-0.90346	0.366282	Nervous system disorders	0.552878
H0	kidney	13105	866	0.970626	-0.0298141	0.905331	1.04063	0.0355313	-0.839093	0.401417	Eye disorders	0.591043
C4	kidney	17573	91	0.912228	-0.0918654	0.73319	1.13499	0.111474	-0.824095	0.409885	Breast cancer	0.599832
K0	kidney	8268	1366	1.02213	0.0218924	0.967431	1.07993	0.0280633	0.780107	0.435328	Digestive system disorders	0.623617
A0	kidney	11178	419	0.963331	-0.0373584	0.871975	1.06426	0.0508358	-0.734883	0.462411	Diseases of Infections	0.643618
C2	kidney	17971	42	0.88847	-0.118254	0.648729	1.21681	0.160455	-0.736993	0.461127	Lung cancer	0.643618
I3	kidney	16938	535	0.968076	-0.0324445	0.88635	1.05734	0.0450003	-0.720984	0.47092	Arrhythmias	0.649544
J2	kidney	17103	167	1.05822	0.0565901	0.90436	1.23826	0.0801639	0.70593	0.480232	Chronic obstructive pulmonary disease	0.654861
A2	kidney	12880	80	0.924566	-0.0784312	0.735807	1.16175	0.11651	-0.673169	0.50084	Viral infections	0.673884
G4	kidney	17444	104	0.936096	-0.0660374	0.767908	1.14112	0.101047	-0.653531	0.513414	Sleep disorders	0.683201
E1	kidney	16902	173	0.951943	-0.0492498	0.815159	1.11168	0.0791456	-0.622269	0.533765	Diabetes	0.693405
F1	kidney	17961	83	1.06777	0.065574	0.850205	1.34101	0.116253	0.564063	0.572711	Dementia	0.723425
E0	kidney	11608	1047	0.982417	-0.0177399	0.922426	1.04631	0.0321478	-0.551824	0.581069	Endocrine disorders	0.732056
K1	kidney	17192	162	1.0423	0.0414332	0.888838	1.22227	0.0812636	0.509862	0.610148	Inflammatory bowel disease	0.762685
I4	kidney	17850	208	0.964998	-0.0356289	0.836803	1.11283	0.0727245	-0.489917	0.624193	Heart failure	0.77585
F4	kidney	15739	185	1.02418	0.0238962	0.882184	1.18904	0.0761498	0.313806	0.753669	Mood disorders	0.863662
K2	kidney	17649	249	0.979683	-0.0205261	0.861483	1.1141	0.0655998	-0.312899	0.754358	Liver diseases	0.863662
M1	kidney	16167	459	0.984597	-0.0155225	0.894539	1.08372	0.0489419	-0.317162	0.751121	Rheumatoid arthritis disorders	0.863662
X2	kidney	17980	17	0.926831	-0.0759844	0.563532	1.52434	0.253855	-0.299322	0.764694	Nervous system	0.867738
J0	kidney	8987	493	0.986425	-0.0136681	0.899721	1.08148	0.0469407	-0.291178	0.770915	Respiratory system disorders	0.872734
A1	kidney	16148	458	0.988111	-0.0119603	0.8983	1.0869	0.0486189	-0.246002	0.805681	Bacterial infections	0.889027
X3	kidney	17980	77	1.03025	0.0298006	0.812603	1.30619	0.12108	0.246122	0.805587	Circulatory system	0.889027
G2	kidney	17822	30	0.956442	-0.044535	0.659477	1.38713	0.189684	-0.234786	0.814375	Epilepsy	0.89656
C1	kidney	17952	70	0.979823	-0.0203834	0.767503	1.25088	0.124609	-0.163578	0.870063	Colorectal cancer	0.937076
F5	kidney	16099	271	1.00656	0.00654083	0.889553	1.13896	0.0630508	0.103739	0.917376	Neurotic disorders	0.957095
H1	kidney	16310	798	1.00397	0.00396675	0.933187	1.08013	0.0373052	0.106332	0.915319	Cataracts	0.957095
I5	kidney	17686	183	1.0085	0.00846307	0.86672	1.17347	0.0772984	0.109486	0.912817	Stroke	0.957095
F2	kidney	16902	187	0.995004	-0.00500892	0.860071	1.1511	0.0743539	-0.0673659	0.94629	Substance abuse	0.97343
M3	kidney	16916	172	0.994805	-0.00520816	0.851363	1.16242	0.0794447	-0.065557	0.947731	Sciatica	0.97343
L0	kidney	10892	478	1.00246	0.00245448	0.913381	1.10022	0.0474788	0.0516963	0.958771	Skin disorders	0.977675
J3	kidney	15476	115	0.999959	-4.09e-05	0.827094	1.20895	0.0968365	-0.000421893	0.999663	Asthma	0.999663
M1	liver	12138	275	0.830918	-0.185224	0.728943	0.94716	0.0668053	-2.77259	0.00556125	Rheumatoid arthritis disorders	0.0278062
C6	liver	13507	39	0.646863	-0.435621	0.457102	0.915401	0.177161	-2.4589	0.0139362	Leukaemia	0.0539464
E2	liver	12890	334	0.861133	-0.149506	0.756924	0.97969	0.0658107	-2.27176	0.0231012	Obesity	0.0815337
D0	liver	12452	345	0.877826	-0.130306	0.783166	0.983928	0.0582174	-2.23827	0.0252034	Blood and immune disorders	0.0866969
X2	liver	13596	9	0.431103	-0.841408	0.190025	0.978029	0.417963	-2.01312	0.0441024	Nervous system	0.1378
D1	liver	12712	292	0.883471	-0.123897	0.780171	1.00045	0.0634428	-1.95289	0.050833	Anemia	0.147878
C5	liver	13316	94	1.24069	0.215669	0.991078	1.55317	0.11461	1.88177	0.0598676	Prostate cancer	0.165517
L0	liver	8233	299	0.892187	-0.114079	0.789864	1.00777	0.0621515	-1.8355	0.0664315	Skin disorders	0.181177
K2	liver	13328	167	1.15814	0.146819	0.981111	1.36712	0.0846388	1.73466	0.0828015	Liver diseases	0.212539
H0	liver	10008	581	1.07441	0.0717732	0.984172	1.17293	0.0447597	1.60352	0.108819	Eye disorders	0.262479
X3	liver	13596	44	0.765527	-0.267191	0.5477	1.06999	0.170838	-1.564	0.117818	Circulatory system	0.272805
N0	liver	7529	511	1.07233	0.0698357	0.976519	1.17755	0.0477542	1.4624	0.143632	Genitourinary system disorders	0.31302
K3	liver	13552	21	0.69687	-0.361156	0.419334	1.15809	0.259153	-1.3936	0.163438	Pancreatitis	0.342578
G2	liver	13474	19	0.711678	-0.34013	0.433105	1.16943	0.253395	-1.34229	0.179501	Epilepsy	0.363547
F4	liver	11887	120	1.13839	0.129612	0.937282	1.38264	0.0991768	1.30688	0.191254	Mood disorders	0.382507
C4	liver	13282	57	1.20758	0.188615	0.908354	1.60537	0.145276	1.29832	0.194177	Breast cancer	0.386743
F5	liver	12093	157	1.11495	0.108814	0.939959	1.32253	0.0871101	1.24915	0.21161	Neurotic disorders	0.405829
I1	liver	9498	437	0.938704	-0.0632548	0.848884	1.03803	0.0513161	-1.23265	0.217706	Hypertension	0.413039
H1	liver	12371	556	1.05741	0.0558249	0.966707	1.15663	0.0457584	1.21999	0.222468	Cataracts	0.418764
I7	liver	13268	141	0.898749	-0.106751	0.752414	1.07355	0.090674	-1.1773	0.239074	Peripheral artery diseases	0.437998
C2	liver	13592	22	0.754315	-0.281945	0.468457	1.21461	0.243048	-1.16004	0.246034	Lung cancer	0.445646
L1	liver	10562	130	0.897291	-0.108375	0.74489	1.08087	0.0949736	-1.1411	0.253828	Infections and excema	0.451249
E1	liver	12706	100	1.13373	0.125517	0.91289	1.40801	0.110542	1.13547	0.256177	Diabetes	0.452076
H2	liver	13199	101	1.12753	0.120027	0.912313	1.39351	0.108063	1.11072	0.26669	Glaucoma	0.458822
M2	liver	11301	504	0.949588	-0.0517271	0.864196	1.04342	0.0480764	-1.07593	0.281957	Osteoarthritis	0.476547
A2	liver	9280	38	0.828395	-0.188266	0.586037	1.17098	0.176589	-1.06613	0.286367	Viral infections	0.478941
I6	liver	13348	161	1.09509	0.0908327	0.926131	1.29486	0.0854979	1.0624	0.288055	Cerebrovascular diseases	0.480092
F3	liver	13572	5	1.67294	0.514581	0.621352	4.50424	0.505335	1.0183	0.308537	Pyschotic disorders	0.505453
C1	liver	13575	43	1.178	0.163822	0.849057	1.63439	0.16707	0.980561	0.326809	Colorectal cancer	0.522285
X0	liver	13596	203	0.928594	-0.0740837	0.799637	1.07835	0.076284	-0.971156	0.33147	All-cause mortality	0.522859
J1	liver	12798	196	1.07417	0.0715456	0.922441	1.25085	0.0776939	0.920865	0.357121	Influenza and Pneumonia	0.545308
K0	liver	6154	873	0.967986	-0.0325373	0.901407	1.03948	0.0363586	-0.894899	0.370841	Digestive system disorders	0.554974
J3	liver	11741	75	1.10988	0.104252	0.868476	1.41838	0.125138	0.833092	0.404793	Asthma	0.594191
G4	liver	13152	56	1.1281	0.120533	0.845557	1.50505	0.14709	0.819446	0.412532	Sleep disorders	0.600482
N1	liver	13246	267	1.05607	0.0545562	0.926801	1.20337	0.0666197	0.818921	0.412832	Renal failure	0.600482
X4	liver	13596	10	0.741911	-0.298525	0.357662	1.53897	0.372273	-0.8019	0.422611	Respiratory system	0.61285
F2	liver	12741	110	0.920857	-0.0824509	0.750823	1.1294	0.104152	-0.791639	0.428571	Substance abuse	0.61776
I0	liver	7320	669	1.03137	0.0308869	0.951441	1.11801	0.0411559	0.750486	0.452962	Circulatory system disorders	0.641362
M3	liver	12766	100	0.923392	-0.0797015	0.744637	1.14506	0.109776	-0.726039	0.467815	Sciatica	0.647122
I3	liver	12811	353	1.04115	0.0403301	0.930153	1.1654	0.0575195	0.701155	0.483206	Arrhythmias	0.657051
G0	liver	10594	351	1.03924	0.038489	0.928162	1.16361	0.0576735	0.66736	0.504542	Nervous system disorders	0.676481
I4	liver	13524	117	0.936034	-0.0661039	0.767555	1.14149	0.101247	-0.652895	0.513824	Heart failure	0.683201
F1	liver	13579	40	1.1147	0.108582	0.794353	1.56423	0.172865	0.62813	0.529919	Dementia	0.693405
K1	liver	12986	129	1.05225	0.0509317	0.873405	1.26772	0.0950466	0.535861	0.592055	Inflammatory bowel disease	0.743943
J2	liver	12916	117	1.04999	0.0487794	0.863188	1.27721	0.0999518	0.488029	0.625529	Chronic obstructive pulmonary disease	0.77585
C3	liver	12738	269	0.969605	-0.0308661	0.853055	1.10208	0.0653403	-0.472389	0.636649	Melanoma	0.783568
G3	liver	13409	30	1.09174	0.0877762	0.741936	1.60648	0.197079	0.445385	0.656042	Transient ischemic attack	0.791932
I2	liver	12748	307	0.97497	-0.0253488	0.864501	1.09955	0.0613553	-0.413148	0.679498	Ischemic heart diseases	0.811341
G1	liver	13560	20	1.09618	0.0918359	0.679059	1.76954	0.244332	0.375865	0.707018	Parkinson disease	0.827984
X1	liver	13596	109	1.03542	0.0348087	0.845262	1.26836	0.103531	0.336214	0.736709	Cancer	0.856224
C0	liver	11947	538	1.01455	0.0144458	0.9263	1.11121	0.0464307	0.311127	0.755704	Cancer	0.863662
I5	liver	13395	97	1.02959	0.0291581	0.830328	1.27666	0.109743	0.265695	0.790474	Stroke	0.882239
M0	liver	5736	501	0.987339	-0.0127413	0.899178	1.08415	0.047722	-0.266991	0.789476	Musculoskeletal system disorders	0.882239
J0	liver	6731	301	0.986408	-0.0136855	0.872954	1.11461	0.0623413	-0.219525	0.826241	Respiratory system disorders	0.903407
E0	liver	8740	665	0.993867	-0.00615211	0.916445	1.07783	0.0413792	-0.148677	0.881809	Endocrine disorders	0.944586
H3	liver	10844	170	1.00841	0.00837948	0.857491	1.1859	0.0827181	0.101302	0.919311	Ear disorders	0.957095
A0	liver	8001	222	0.995628	-0.00438154	0.86329	1.14825	0.0727683	-0.0602122	0.951987	Diseases of Infections	0.974315
F0	liver	10310	287	1.00325	0.00324626	0.885535	1.13662	0.0636798	0.0509779	0.959343	Mental and behavioural disorders	0.977675
A1	liver	12140	281	0.998793	-0.00120747	0.879928	1.13372	0.0646479	-0.0186777	0.985098	Bacterial infections	0.993538
M4	liver	9766	284	0.99882	-0.00118086	0.881224	1.13211	0.0639109	-0.0184766	0.985259	Soft tissue disorders	0.993538
N1	meanOverall	22340	616	1.39835	0.33529	1.28009	1.52752	0.045081	7.43749	1.03e-13	Renal failure	6.16e-12
I1	meanOverall	15704	795	1.29568	0.259037	1.20441	1.39387	0.03727	6.95027	3.65e-12	Hypertension	1.09e-10
I0	meanOverall	12172	1186	1.1793	0.164917	1.1121	1.25056	0.0299349	5.5092	3.6e-08	Circulatory system disorders	7.21e-07
F1	meanOverall	22923	119	1.84419	0.61204	1.47908	2.29942	0.112563	5.43732	5.41e-08	Dementia	8.11e-07
F0	meanOverall	17550	637	1.24614	0.220052	1.14715	1.35367	0.0422292	5.2109	1.88e-07	Mental and behavioural disorders	2.26e-06
I4	meanOverall	22775	261	1.41739	0.348814	1.23373	1.62838	0.0708017	4.92664	8.37e-07	Heart failure	8.37e-06
I6	meanOverall	22456	347	1.32129	0.278608	1.1787	1.48113	0.0582635	4.78187	1.74e-06	Cerebrovascular diseases	1.49e-05
I3	meanOverall	21578	678	1.21301	0.193109	1.11912	1.31478	0.0411047	4.69797	2.63e-06	Arrhythmias	1.97e-05
X0	meanOverall	22956	471	1.26042	0.231443	1.14109	1.39223	0.0507476	4.56067	5.1e-06	All-cause mortality	3.4e-05
N0	meanOverall	12743	1029	1.16026	0.148641	1.08766	1.2377	0.0329683	4.5086	6.53e-06	Genitourinary system disorders	3.92e-05
E0	meanOverall	14716	1326	1.13225	0.124208	1.07053	1.19753	0.0285986	4.34314	1.4e-05	Endocrine disorders	6.95e-05
F4	meanOverall	20155	242	1.35831	0.306242	1.18363	1.55877	0.070233	4.36037	1.3e-05	Mood disorders	6.95e-05
J1	meanOverall	21559	439	1.25198	0.224728	1.13083	1.38611	0.0519272	4.32775	1.51e-05	Influenza and Pneumonia	6.95e-05
J2	meanOverall	21716	212	1.37538	0.318727	1.18534	1.59588	0.0758684	4.20105	2.66e-05	Chronic obstructive pulmonary disease	0.000113865
I2	meanOverall	21421	570	1.19892	0.181418	1.09842	1.30861	0.0446681	4.06146	4.88e-05	Ischemic heart diseases	0.000195068
A0	meanOverall	14320	500	1.19643	0.179344	1.09021	1.31301	0.0474383	3.78058	0.000156462	Diseases of Infections	0.000586733
A1	meanOverall	20555	564	1.16896	0.156115	1.07137	1.27544	0.0444793	3.50983	0.000448397	Bacterial infections	0.00141599
D1	meanOverall	21457	601	1.16384	0.151727	1.06937	1.26666	0.0431939	3.5127	0.000443584	Anemia	0.00141599
X3	meanOverall	22956	92	1.58196	0.458665	1.22693	2.03973	0.129672	3.53712	0.00040451	Circulatory system	0.00141599
E1	meanOverall	21540	239	1.2741	0.242236	1.10941	1.46322	0.0706155	3.43036	0.000602787	Diabetes	0.00180822
F2	meanOverall	21508	265	1.25762	0.229224	1.10268	1.43433	0.0670812	3.41712	0.000632876	Substance abuse	0.00180822
H3	meanOverall	18304	385	1.19521	0.178319	1.07531	1.32847	0.0539333	3.30628	0.000945419	Ear disorders	0.00257842
K2	meanOverall	22511	314	1.20902	0.189807	1.07488	1.3599	0.060002	3.16334	0.0015597	Liver diseases	0.00406878
G0	meanOverall	17944	734	1.11688	0.11054	1.03551	1.20464	0.0385951	2.86408	0.0041822	Nervous system disorders	0.00965122
H1	meanOverall	20732	1093	1.0948	0.0905689	1.02924	1.16453	0.0315061	2.87465	0.00404478	Cataracts	0.00965122
I5	meanOverall	22546	205	1.23934	0.214578	1.07113	1.43397	0.0744231	2.88322	0.00393628	Stroke	0.00965122
D0	meanOverall	21005	714	1.11644	0.110144	1.0337	1.20581	0.0392881	2.8035	0.00505519	Blood and immune disorders	0.0108325
H0	meanOverall	16680	1108	1.09163	0.0876687	1.02683	1.16051	0.0312222	2.8079	0.00498658	Eye disorders	0.0108325
J0	meanOverall	11473	653	1.12056	0.113831	1.03395	1.21443	0.0410453	2.7733	0.00554912	Respiratory system disorders	0.0114809
M2	meanOverall	18935	1002	1.09183	0.0878518	1.02366	1.16453	0.0328907	2.67102	0.00756211	Osteoarthritis	0.0151242
K1	meanOverall	21879	223	1.20203	0.184011	1.04606	1.38126	0.0709116	2.59493	0.0094609	Inflammatory bowel disease	0.0183114
X2	meanOverall	22956	19	1.98641	0.686329	1.13169	3.48667	0.287054	2.39094	0.0168054	Nervous system	0.0315101
F5	meanOverall	20586	355	1.13905	0.130198	1.02202	1.26948	0.0553136	2.35381	0.0185822	Neurotic disorders	0.0337859
I7	meanOverall	22361	271	1.15423	0.143432	1.01724	1.30967	0.0644617	2.22508	0.0260758	Peripheral artery diseases	0.0460161
M0	meanOverall	9808	1012	1.06759	0.0654034	1.0015	1.13804	0.0326065	2.00584	0.044873	Musculoskeletal system disorders	0.0749379
M1	meanOverall	20688	576	1.09091	0.0870151	1.00196	1.18777	0.043399	2.005	0.0449628	Rheumatoid arthritis disorders	0.0749379
C6	meanOverall	22805	77	0.79749	-0.226285	0.632079	1.00619	0.118602	-1.90794	0.0563987	Leukaemia	0.0914573
C5	meanOverall	22447	209	1.13215	0.124117	0.980332	1.30748	0.0734611	1.68956	0.0911114	Prostate cancer	0.14386
G4	meanOverall	22252	128	1.16965	0.156705	0.966874	1.41495	0.0971404	1.61318	0.106705	Sleep disorders	0.164162
E2	meanOverall	21800	655	1.06672	0.0645905	0.983212	1.15733	0.041593	1.55292	0.120443	Obesity	0.180665
M4	meanOverall	16491	523	1.069	0.066722	0.977886	1.1686	0.0454518	1.46797	0.142112	Soft tissue disorders	0.207969
K0	meanOverall	10422	1608	1.0357	0.0350755	0.984794	1.08923	0.0257141	1.36406	0.17255	Digestive system disorders	0.2465
X4	meanOverall	22956	32	1.29216	0.256314	0.878505	1.90058	0.196865	1.30198	0.192923	Respiratory system	0.269195
G1	meanOverall	22887	41	1.24132	0.216179	0.888726	1.73382	0.170485	1.26802	0.20479	Parkinson disease	0.279259
L1	meanOverall	17839	278	1.07428	0.0716522	0.950067	1.21474	0.0626922	1.14292	0.253072	Infections and excema	0.337429
A2	meanOverall	16539	86	1.13541	0.126996	0.910774	1.41546	0.11248	1.12906	0.258874	Viral infections	0.337662
G3	meanOverall	22627	86	1.13299	0.124861	0.90767	1.41425	0.113133	1.10367	0.269736	Transient ischemic attack	0.337988
J3	meanOverall	19786	135	1.10428	0.0991959	0.925702	1.31731	0.090001	1.10216	0.27039	Asthma	0.337988
F3	meanOverall	22916	16	1.31606	0.274641	0.780714	2.21849	0.266427	1.03083	0.302621	Pyschotic disorders	0.370556
C1	meanOverall	22908	93	1.10477	0.0996331	0.89403	1.36517	0.107986	0.922646	0.356192	Colorectal cancer	0.42743
C4	meanOverall	22405	111	1.08625	0.0827303	0.898282	1.31355	0.0969412	0.853407	0.393433	Breast cancer	0.462863
M3	meanOverall	21637	194	1.06375	0.0617967	0.918754	1.23162	0.0747634	0.826563	0.408485	Sciatica	0.471328
C0	meanOverall	20091	1068	1.02596	0.0256288	0.964356	1.0915	0.0315941	0.81119	0.417257	Cancer	0.472366
X1	meanOverall	22956	247	1.05296	0.051601	0.923701	1.2003	0.0668218	0.772218	0.439985	Cancer	0.488873
C3	meanOverall	21505	519	0.974793	-0.0255306	0.892064	1.06519	0.0452493	-0.564221	0.572604	Melanoma	0.624658
L0	meanOverall	13969	578	1.02323	0.0229633	0.940344	1.11342	0.043099	0.532804	0.594169	Skin disorders	0.63661
H2	meanOverall	22257	145	1.04305	0.0421487	0.880866	1.23509	0.086225	0.488822	0.624968	Glaucoma	0.657861
C2	meanOverall	22940	39	1.06572	0.0636523	0.769246	1.47646	0.166328	0.382692	0.701948	Lung cancer	0.726153
K3	meanOverall	22868	39	0.982454	-0.0177015	0.710022	1.35942	0.165696	-0.106831	0.914923	Pancreatitis	0.93043
G2	meanOverall	22745	47	0.990746	-0.00929722	0.737369	1.33119	0.150701	-0.0616931	0.950807	Epilepsy	0.950807
X0	OCT	22395	1472	1.15764	0.146384	1.09754	1.22103	0.0272001	5.38172	7.38e-08	All-cause mortality	3.93e-06
J2	OCT	21646	941	1.16604	0.153616	1.09065	1.24665	0.0341046	4.50425	6.66e-06	Chronic obstructive pulmonary disease	0.000145328
F0	OCT	18364	2321	1.09896	0.0943608	1.05391	1.14592	0.021353	4.41909	9.91e-06	Mental and behavioural disorders	0.000182988
N1	OCT	22024	1488	1.12556	0.118279	1.06768	1.18657	0.0269348	4.39129	1.13e-05	Renal failure	0.000200321
H2	OCT	22327	468	1.20576	0.187113	1.09761	1.32457	0.0479484	3.90238	9.53e-05	Glaucoma	0.0012357
F4	OCT	20478	825	1.1481	0.138104	1.07009	1.23179	0.0359015	3.84676	0.000119691	Mood disorders	0.00147312
J1	OCT	21562	1250	1.11048	0.104791	1.04837	1.17626	0.0293631	3.5688	0.00035862	Influenza and Pneumonia	0.0035862
N0	OCT	14920	3368	1.06448	0.0624834	1.02816	1.10208	0.0177116	3.52782	0.000419002	Genitourinary system disorders	0.00406224
D0	OCT	21230	1970	1.0848	0.0813976	1.03662	1.13522	0.0231793	3.51165	0.000445332	Blood and immune disorders	0.00411076
F2	OCT	21020	1162	1.11171	0.1059	1.04748	1.17988	0.0303638	3.48769	0.000487216	Substance abuse	0.00433081
H0	OCT	19065	3333	1.06339	0.0614655	1.02704	1.10104	0.0177485	3.46315	0.000533899	Eye disorders	0.00450937
I4	OCT	22284	650	1.14994	0.139713	1.06061	1.2468	0.0412613	3.38606	0.000709046	Heart failure	0.00557938
X1	OCT	22395	748	1.1328	0.124694	1.05192	1.2199	0.037794	3.29931	0.000969212	Cancer	0.0072319
E2	OCT	21877	1751	1.08157	0.0784177	1.02998	1.13575	0.0249366	3.14468	0.00166266	Obesity	0.0104151
I0	OCT	14245	3840	1.04923	0.0480544	1.01598	1.08356	0.0164283	2.9251	0.00344348	Circulatory system disorders	0.0189985
D1	OCT	21548	1575	1.07723	0.0743954	1.02386	1.13339	0.0259277	2.86935	0.00411323	Anemia	0.0219372
X3	OCT	22395	284	1.19474	0.177928	1.05593	1.35179	0.0630138	2.82364	0.00474823	Circulatory system	0.0247734
E0	OCT	16687	3948	1.04615	0.0451186	1.01336	1.08001	0.0162504	2.77647	0.00549535	Endocrine disorders	0.027766
I2	OCT	21351	1588	1.07096	0.0685574	1.01804	1.12663	0.0258554	2.65157	0.00801181	Ischemic heart diseases	0.0369776
I1	OCT	16706	2644	1.05404	0.0526276	1.01373	1.09595	0.0198955	2.6452	0.00816416	Hypertension	0.0373219
K0	OCT	13718	5024	1.03766	0.0369697	1.00876	1.06739	0.0144118	2.56524	0.0103105	Digestive system disorders	0.0438843
K2	OCT	22181	685	1.10483	0.0996918	1.02236	1.19395	0.0395797	2.51876	0.0117769	Liver diseases	0.0479059
H1	OCT	21644	2206	1.05539	0.053906	1.01131	1.10138	0.021763	2.47696	0.0132508	Cataracts	0.052565
K1	OCT	21587	670	1.1028	0.097853	1.02044	1.19181	0.039603	2.47085	0.0134793	Inflammatory bowel disease	0.0526021
I3	OCT	21736	1737	1.0609	0.0591199	1.01087	1.11342	0.0246495	2.39842	0.0164658	Arrhythmias	0.0617468
J0	OCT	14220	2781	1.04759	0.0464922	1.00844	1.08826	0.0194329	2.39244	0.0167368	Respiratory system disorders	0.0622763
C2	OCT	22384	198	1.19289	0.176379	1.03084	1.38042	0.0744952	2.36766	0.0179009	Lung cancer	0.0660956
M0	OCT	12904	4030	1.03642	0.0357705	1.00423	1.06964	0.0160979	2.22206	0.0262795	Musculoskeletal system disorders	0.088832
X2	OCT	22395	81	1.26863	0.23794	1.00587	1.60004	0.118416	2.00937	0.044498	Nervous system	0.1378
I6	OCT	22041	801	1.07099	0.0685805	0.997358	1.15005	0.0363406	1.88716	0.0591392	Cerebrovascular diseases	0.16504
F1	OCT	22365	348	1.10996	0.10432	0.995618	1.23742	0.0554661	1.8808	0.0599998	Dementia	0.165517
I7	OCT	22062	702	1.07507	0.0723832	0.996263	1.1601	0.0388409	1.86358	0.0623804	Peripheral artery diseases	0.171101
M3	OCT	21567	576	1.08064	0.077556	0.993672	1.17522	0.0428088	1.81169	0.0700348	Sciatica	0.188858
G0	OCT	19236	2398	1.03733	0.0366509	0.995729	1.08067	0.0208836	1.75501	0.0792584	Nervous system disorders	0.207087
L1	OCT	19335	1628	1.04444	0.0434775	0.993595	1.09788	0.025461	1.70761	0.0877083	Infections and excema	0.222751
H3	OCT	19407	1658	1.04226	0.0413916	0.992132	1.09492	0.0251487	1.64587	0.0997895	Ear disorders	0.247186
A1	OCT	21377	1658	1.03991	0.0391341	0.989921	1.09242	0.0251352	1.55695	0.119483	Bacterial infections	0.272805
M4	OCT	18129	2641	1.03167	0.0311804	0.992067	1.07286	0.0199725	1.56117	0.118484	Soft tissue disorders	0.272805
X4	OCT	22395	97	1.17239	0.159045	0.95166	1.44432	0.106427	1.49441	0.135069	Respiratory system	0.297399
C0	OCT	20880	3026	1.0273	0.0269338	0.990532	1.06543	0.0185956	1.4484	0.147506	Cancer	0.317651
C5	OCT	22228	578	1.06167	0.0598408	0.976338	1.15445	0.0427494	1.3998	0.161572	Prostate cancer	0.341651
I5	OCT	22074	440	1.06865	0.0663926	0.971209	1.17586	0.0487795	1.36107	0.17349	Stroke	0.352861
M1	OCT	21024	1643	1.034	0.0334326	0.984132	1.08639	0.0252187	1.32571	0.184937	Rheumatoid arthritis disorders	0.371421
A0	OCT	18279	2322	1.02719	0.0268318	0.985305	1.07087	0.0212432	1.26308	0.206562	Diseases of Infections	0.398192
A2	OCT	19813	763	1.04279	0.0419045	0.969856	1.12122	0.0369968	1.13265	0.25736	Viral infections	0.452501
G2	OCT	22141	146	1.09563	0.0913278	0.927123	1.29476	0.0852037	1.07187	0.283776	Epilepsy	0.477939
G4	OCT	21908	474	1.0476	0.046499	0.953618	1.15084	0.0479556	0.969626	0.332233	Sleep disorders	0.522859
L0	OCT	16696	2772	1.01562	0.0154976	0.977627	1.05509	0.0194518	0.796719	0.425615	Skin disorders	0.615346
E1	OCT	21361	855	1.02807	0.027683	0.959183	1.1019	0.0353868	0.782297	0.43404	Diabetes	0.623617
C3	OCT	21886	1261	1.018	0.0178381	0.962184	1.07705	0.02877	0.620024	0.535242	Melanoma	0.693405
F5	OCT	20939	1183	1.01727	0.0171239	0.959687	1.07831	0.0297313	0.575956	0.564645	Neurotic disorders	0.717009
G1	OCT	22368	146	0.961736	-0.0390154	0.815478	1.13423	0.0841674	-0.463545	0.642974	Parkinson disease	0.787315
K3	OCT	22309	106	0.956991	-0.0439608	0.788378	1.16167	0.0988878	-0.444552	0.656643	Pancreatitis	0.791932
F3	OCT	22339	38	1.06891	0.0666393	0.770957	1.48201	0.166719	0.399711	0.689369	Pyschotic disorders	0.819052
C1	OCT	22289	258	1.0254	0.0250824	0.905233	1.16152	0.063596	0.394403	0.693284	Colorectal cancer	0.819646
J3	OCT	19768	525	0.98527	-0.0148392	0.902498	1.07563	0.0447709	-0.331448	0.740306	Asthma	0.857422
C6	OCT	22289	196	0.977855	-0.022394	0.847799	1.12786	0.0728166	-0.30754	0.758432	Leukaemia	0.864721
C4	OCT	21991	431	0.993588	-0.00643279	0.902015	1.09446	0.049333	-0.130395	0.896254	Breast cancer	0.953884
G3	OCT	22218	255	0.993689	-0.00633107	0.876537	1.1265	0.0640038	-0.0989171	0.921204	Transient ischemic attack	0.957095
M2	OCT	19924	2860	0.998677	-0.00132396	0.961926	1.03683	0.0191299	-0.0692086	0.944824	Osteoarthritis	0.97343
N1	Pancreas	14289	347	1.2632	0.23365	1.12828	1.41426	0.0576309	4.05424	5.03e-05	Renal failure	0.000754463
H0	Pancreas	10574	680	1.16388	0.151757	1.07618	1.25872	0.0399696	3.79682	0.000146562	Eye disorders	0.00171585
E2	Pancreas	13907	386	1.22561	0.203435	1.0937	1.37342	0.0580986	3.50155	0.000462553	Obesity	0.00418916
E1	Pancreas	13713	146	1.38543	0.32601	1.15167	1.66664	0.0942862	3.45766	0.000544882	Diabetes	0.00450937
J2	Pancreas	13908	116	1.39126	0.330208	1.14013	1.69771	0.101568	3.25111	0.00114955	Chronic obstructive pulmonary disease	0.00805232
H1	Pancreas	13233	692	1.13321	0.125052	1.04862	1.22462	0.0395819	3.15933	0.00158134	Cataracts	0.0102574
N0	Pancreas	8039	602	1.13956	0.13064	1.04854	1.23847	0.042469	3.07614	0.002097	Genitourinary system disorders	0.012582
M4	Pancreas	10325	309	1.19678	0.179631	1.06458	1.34539	0.0597213	3.00782	0.0026313	Soft tissue disorders	0.0152171
I0	Pancreas	7668	735	1.10923	0.103662	1.0295	1.19513	0.0380573	2.72385	0.00645258	Circulatory system disorders	0.0312852
E0	Pancreas	9220	767	1.10223	0.0973389	1.02396	1.18649	0.0375814	2.59008	0.00959533	Endocrine disorders	0.0422546
I4	Pancreas	14566	135	1.25825	0.229725	1.04887	1.50943	0.0928626	2.47381	0.013368	Heart failure	0.0525953
I1	Pancreas	10005	492	1.11266	0.106751	1.01515	1.21953	0.0467954	2.28123	0.0225348	Hypertension	0.0801236
G4	Pancreas	14184	66	1.3756	0.318892	1.04112	1.81755	0.142144	2.24344	0.0248684	Sleep disorders	0.0864988
K3	Pancreas	14604	26	1.56899	0.450434	1.00467	2.45029	0.227439	1.98046	0.0476522	Pancreatitis	0.141178
J1	Pancreas	13729	245	1.14028	0.131277	0.999594	1.30078	0.0671869	1.95391	0.0507115	Influenza and Pneumonia	0.147878
M1	Pancreas	13139	338	1.11471	0.108598	0.996869	1.24649	0.0570079	1.90496	0.0567853	Rheumatoid arthritis disorders	0.162244
G0	Pancreas	11298	402	1.10364	0.0986103	0.996876	1.22183	0.0519085	1.89969	0.0574732	Nervous system disorders	0.162749
K2	Pancreas	14373	175	1.16683	0.154291	0.994796	1.36862	0.0813835	1.89585	0.0579794	Liver diseases	0.162749
F4	Pancreas	12829	127	1.18362	0.168577	0.984978	1.42232	0.0937324	1.79849	0.0720999	Mood disorders	0.193341
X4	Pancreas	14663	14	1.81162	0.594219	0.945471	3.47123	0.331787	1.79096	0.073299	Respiratory system	0.195464
L1	Pancreas	11190	151	1.16442	0.152225	0.984985	1.37655	0.0853863	1.78279	0.0746213	Infections and excema	0.197891
G1	Pancreas	14630	27	1.45198	0.372929	0.950703	2.21757	0.216066	1.72599	0.0843488	Parkinson disease	0.215359
K0	Pancreas	6572	951	1.05653	0.0549897	0.98992	1.12762	0.0332255	1.65504	0.0979159	Digestive system disorders	0.24479
H2	Pancreas	14213	102	1.18307	0.168114	0.965538	1.44961	0.103667	1.62167	0.104874	Glaucoma	0.255529
M2	Pancreas	12111	552	1.07317	0.0706149	0.984236	1.17014	0.0441359	1.59994	0.109612	Osteoarthritis	0.263068
M0	Pancreas	6010	550	1.0707	0.0683135	0.982238	1.16713	0.0439982	1.55264	0.120508	Musculoskeletal system disorders	0.272849
A1	Pancreas	13031	323	1.08893	0.0851972	0.972074	1.21984	0.0579196	1.47095	0.141303	Bacterial infections	0.309706
X3	Pancreas	14663	59	1.21852	0.197638	0.92599	1.60346	0.140068	1.41101	0.158242	Circulatory system	0.33609
C5	Pancreas	14358	129	1.1287	0.121063	0.944827	1.34835	0.0907246	1.3344	0.182072	Prostate cancer	0.367203
F1	Pancreas	14652	56	1.1936	0.176978	0.907906	1.56921	0.13959	1.26784	0.204857	Dementia	0.398192
L0	Pancreas	8605	346	1.07288	0.0703454	0.96202	1.19651	0.0556467	1.26414	0.206178	Skin disorders	0.398192
A0	Pancreas	8572	264	1.08004	0.0769982	0.953257	1.22369	0.0637097	1.20858	0.226824	Diseases of Infections	0.423641
C2	Pancreas	14656	25	1.27449	0.242549	0.836589	1.94162	0.214785	1.12926	0.258787	Lung cancer	0.45335
G2	Pancreas	14536	31	1.22928	0.206431	0.851137	1.77543	0.187561	1.1006	0.271069	Epilepsy	0.463036
I2	Pancreas	13705	362	1.05603	0.054516	0.94917	1.17492	0.0544312	1.00156	0.316557	Ischemic heart diseases	0.511608
X2	Pancreas	14663	10	0.701298	-0.354823	0.350471	1.40331	0.353912	-1.00257	0.316067	Nervous system	0.511608
I7	Pancreas	14285	162	1.08167	0.0785037	0.922576	1.26819	0.0811696	0.967157	0.333466	Peripheral artery diseases	0.523083
C1	Pancreas	14639	57	0.882298	-0.125225	0.673911	1.15512	0.137468	-0.910943	0.362325	Colorectal cancer	0.548631
H3	Pancreas	11613	217	1.06444	0.0624483	0.927237	1.22194	0.0704067	0.886966	0.375097	Ear disorders	0.559151
C3	Pancreas	13733	301	0.950884	-0.0503632	0.845647	1.06922	0.0598427	-0.841593	0.400016	Melanoma	0.590793
I3	Pancreas	13752	411	1.0385	0.037778	0.939676	1.14772	0.0510206	0.740445	0.45903	Arrhythmias	0.643618
X1	Pancreas	14663	157	0.940598	-0.0612396	0.800118	1.10574	0.0825304	-0.742025	0.458072	Cancer	0.643618
K1	Pancreas	14015	137	1.06361	0.0616694	0.89363	1.26592	0.0888448	0.694125	0.487604	Inflammatory bowel disease	0.661158
F2	Pancreas	13725	122	0.938794	-0.0631588	0.780981	1.1285	0.0939023	-0.672601	0.501201	Substance abuse	0.673884
J0	Pancreas	7060	348	1.03616	0.0355213	0.929355	1.15524	0.055504	0.639978	0.522187	Respiratory system disorders	0.688598
I5	Pancreas	14382	110	1.06391	0.0619506	0.8767	1.2911	0.0987475	0.627364	0.530421	Stroke	0.693405
C6	Pancreas	14562	42	0.911417	-0.0927545	0.665313	1.24856	0.160587	-0.577598	0.563535	Leukaemia	0.717009
X0	Pancreas	14663	281	1.03126	0.0307845	0.913379	1.16436	0.0619344	0.49705	0.619154	All-cause mortality	0.771932
I6	Pancreas	14331	195	1.03458	0.0339958	0.894527	1.19656	0.0742136	0.45808	0.646895	Cerebrovascular diseases	0.788244
D0	Pancreas	13391	416	1.02329	0.02302	0.926219	1.13053	0.0508502	0.452703	0.650763	Blood and immune disorders	0.789282
F0	Pancreas	11133	339	1.0251	0.0247877	0.918048	1.14463	0.0562731	0.44049	0.659582	Mental and behavioural disorders	0.792707
J3	Pancreas	12616	87	0.957969	-0.0429403	0.770279	1.19139	0.111258	-0.385952	0.699532	Asthma	0.825001
C0	Pancreas	12869	645	1.0154	0.0152821	0.937564	1.0997	0.0406905	0.37557	0.707237	Cancer	0.827984
C4	Pancreas	14327	63	0.951218	-0.0500122	0.733728	1.23318	0.132454	-0.377583	0.705741	Breast cancer	0.827984
D1	Pancreas	13694	343	1.01206	0.0119906	0.906824	1.12951	0.05602	0.214042	0.830514	Anemia	0.906015
M3	Pancreas	13737	99	0.981299	-0.0188782	0.798219	1.20637	0.105356	-0.179185	0.857792	Sciatica	0.929436
G3	Pancreas	14405	52	1.02359	0.0233162	0.773026	1.35537	0.143247	0.162769	0.8707	Transient ischemic attack	0.937076
F5	Pancreas	13043	202	1.01004	0.00999084	0.874543	1.16653	0.0734935	0.135942	0.891867	Neurotic disorders	0.951325
A2	Pancreas	9974	43	1.00372	0.00371011	0.738065	1.36498	0.156856	0.0236529	0.981129	Viral infections	0.993538
F3	Pancreas	14643	9	0.998969	-0.00103159	0.508468	1.96264	0.344558	-0.00299395	0.997611	Pyschotic disorders	0.999663

[truncated: 12 more sheets: Table10-DiseasePredict_lifelong, Table11_DiseasePredict_10year, Table12-MetabolicAsso, Table13-MetaAsso_sensitivity, Table14-ProteomicAsso, Table15-ProAsso_sensitivity, Table16-TissueEnrichment, Table17-GOEnrichment, Table18-PheWAS_categories, Table19-PheWAS_results_noEye, Table20-PheWAS_results_withEye, Table 21-Drug target]
